# Supplementary material for: Social Support of Patients with Type 2 Diabetes in Marginalized Contexts in Mexico and Its Relation to Compliance with Treatment: A Sociocultural Approach
Source: PubMed Central journal article supplement (PMC4636160; doi:10.1371/journal.pone.0141766), 2015-11-06

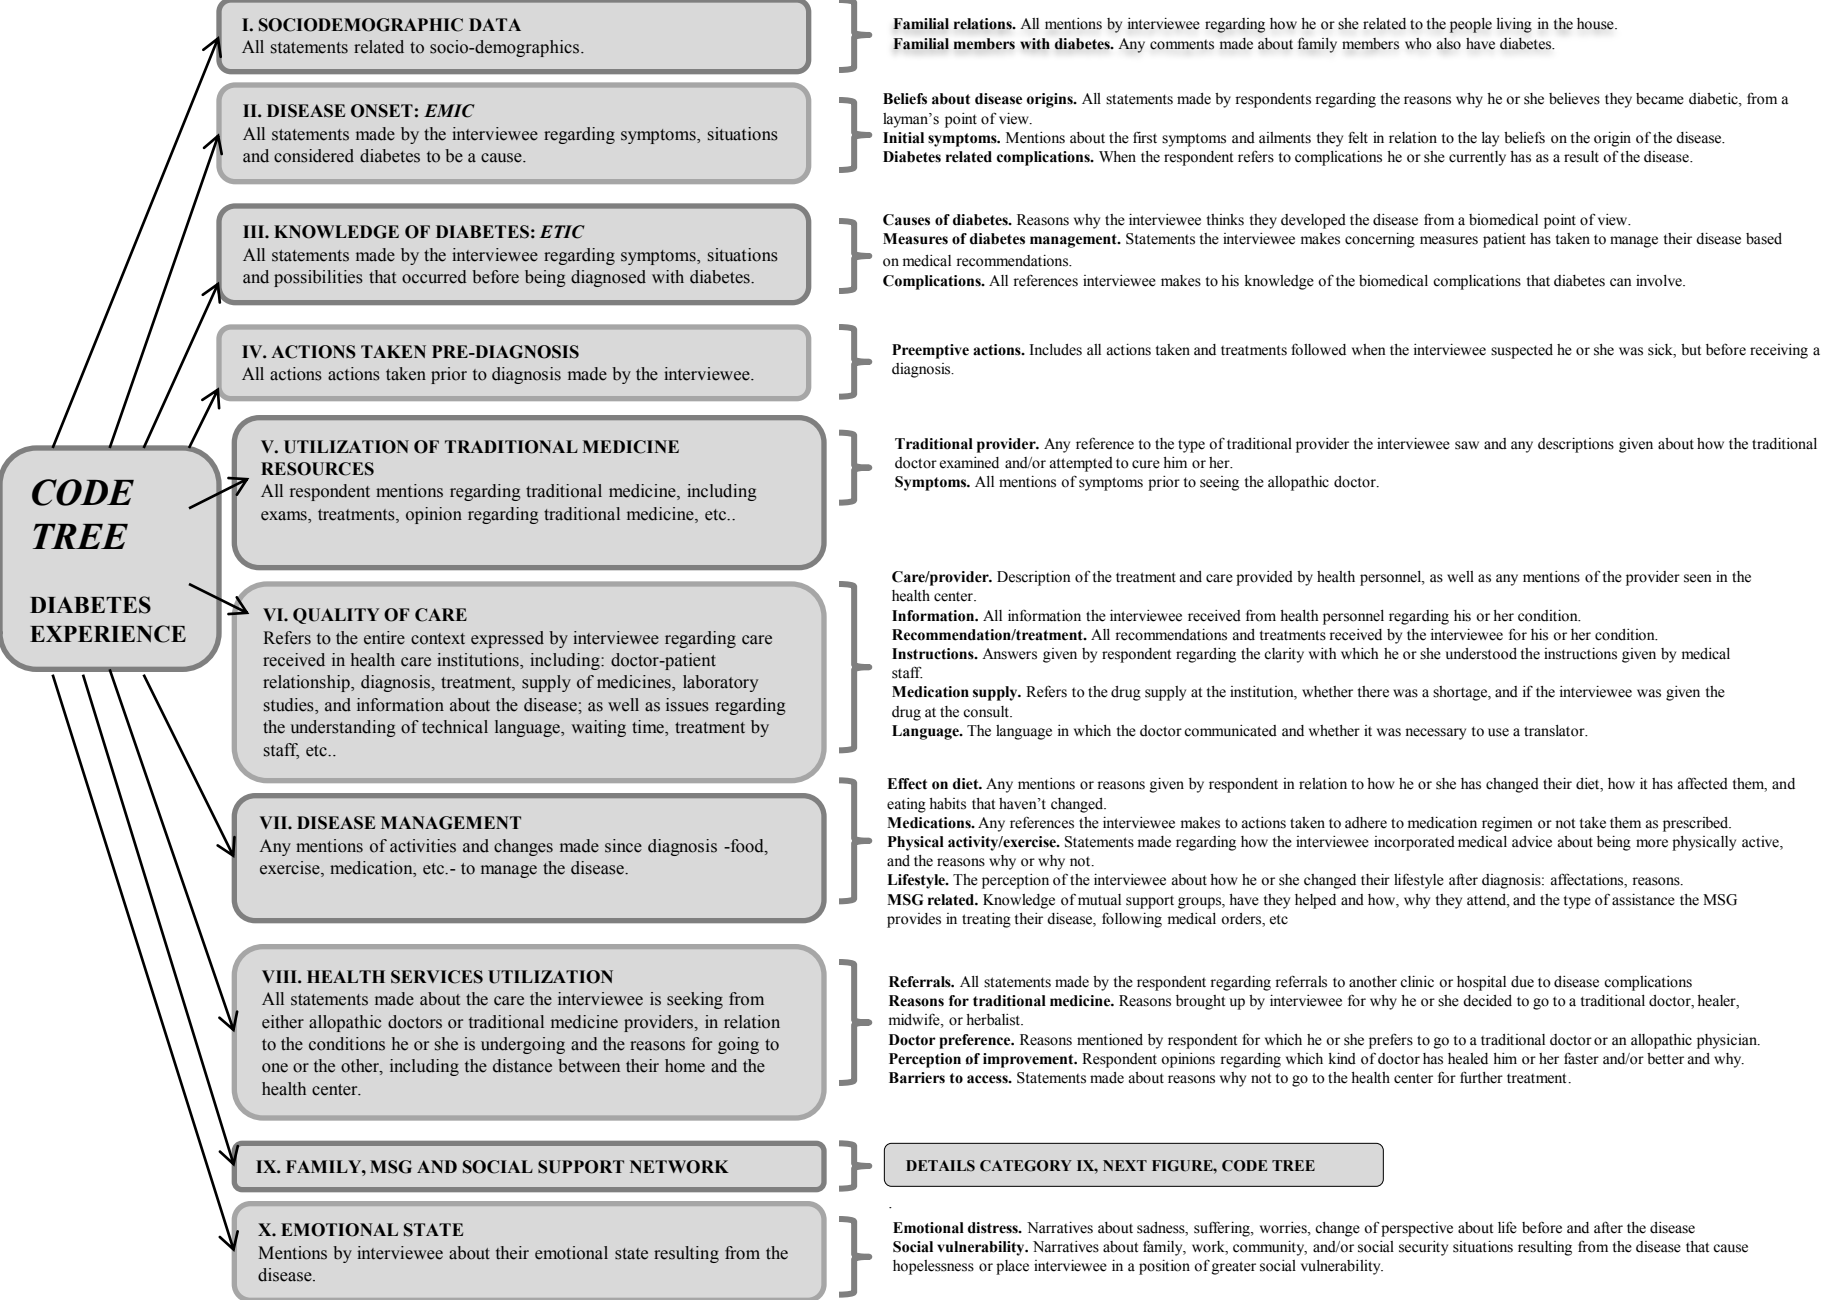

Supplement: pone.0141766.s001.pdf [file pone.0141766.s001.pdf]
