# Supplementary material for: Social Support of Patients with Type 2 Diabetes in Marginalized Contexts in Mexico and Its Relation to Compliance with Treatment: A Sociocultural Approach
Source: PubMed Central journal article supplement (PMC4636160; doi:10.1371/journal.pone.0141766), 2015-11-06
Supplement: pone.0141766.s003.pdf [file pone.0141766.s003.pdf]

## Dictionary: Quantitative Variables

| Variable name | Variable description                         | Coding                                                               |
|---------------|----------------------------------------------|----------------------------------------------------------------------|
| ID            |                                              |                                                                      |
| edadf         | Age in years                                 | Range: 21 - 86                                                       |
| tipoMpio      | Type of locality                             | 0=indigenous, 1=rural, 2=urban                                       |
| sexo          | Sex                                          | 1=Male, 2=Female                                                     |
| gpo_edad2     | Age group                                    | 1=21-49 years, 2=50-64 years, 3= 65-86 years                         |
| edociv4       | Marital status                               | 1=Single, 2=Separated/Divorced, 3=Widowed, 4=Married/Cohabiting      |
| school        | Schooling                                    | 1=illiterate, 2=elementary, 3=higher than elementary                 |
| p77           | Occupation                                   | 1=housekeeper, 2=farmer or trader, 3=worker, 4=professional or other |
| progrm        | Beneficiary of government assistance program | 1=Yes, 2=No                                                          |
| tdiab5        | Time elapsed since diabetes diagnosis        | 1=3 years or fewer, 2=4-12 years, 3=more than 12 years               |
| p31           | Had complications                            | 1=Yes, 0=No                                                          |
| comp_Neuro    | Ulcers                                       | 1=Yes, 0=No                                                          |
| comp_Amp      | Amputations                                  | 1=Yes, 0=No                                                          |
| comp_Nefro    | Nephropathy                                  | 1=Yes, 0=No                                                          |
| comp_Vista    | Visual impairment                            | 1=Yes, 0=No                                                          |
| comadbt       | Diabetic coma                                | 1=Yes, 0=No                                                          |
| p89           | Had any support                              | 0=no support, 1=some support                                         |
| Apoy_eco      | Economic support                             | 1=Yes, 0=No                                                          |
| Apoy_especie  | Material support                             | 1=Yes, 0=No                                                          |
| Apoy_cuid     | Treatment support                            | 1=Yes, 0=No                                                          |
| Apoy_afect    | Emotional support                            | 1=Yes, 0=No                                                          |
| Apoy_otro     | Other support                                | 1=Yes, 0=No                                                          |
| p57           | Consumption of tobacco                       | 1=Yes, 0=No                                                          |
| p59           | Consumption of alcohol                       | 1=Yes, 0=No                                                          |
| p85           | Family composition                           | 0=lives alone, 1=lives with relative                                 |
| p96           | Family history of diabetes                   | 1=Yes, 0=No                                                          |
| conocDM       | Knowledge of disease                         | 1=Yes, 0=No                                                          |
| scare         | Self-care                                    | 1=Yes, 0=No                                                          |
| p43           | Satisfied with medical care                  | 1=Yes, 2=No, 3=regular                                               |
| trad2         | Use of traditional medicine                  | 1=Yes, 0=No                                                          |
