# Supplementary material for: Social Support of Patients with Type 2 Diabetes in Marginalized Contexts in Mexico and Its Relation to Compliance with Treatment: A Sociocultural Approach
Source: PubMed Central journal article supplement (PMC4636160; doi:10.1371/journal.pone.0141766), 2015-11-06
Supplement: pone.0141766.s004.pdf [file pone.0141766.s004.pdf]

| ID | edadf | tipoMpio              | sexo   | gpo_edad2   | edociv4              | school                 | p77                   |
|----|-------|-----------------------|--------|-------------|----------------------|------------------------|-----------------------|
| 1  | 52    | Indigenous localities | Female | 50-64 years | Married/Cohabitation | Elementary             | Housekeeper           |
| 2  | 43    | Indigenous localities | Female | 21-49 years | Married/Cohabitation | Elementary             | Housekeeper           |
| 3  | 56    | Indigenous localities | Female | 50-64 years | Married/Cohabitation | Elementary             | Former or trader      |
| 4  |       | Indigenous localities | Female |             | Married/Cohabitation | Illiteracy             | Housekeeper           |
| 5  | 52    | Indigenous localities | Female | 50-64 years | Separated/Divorced   | Elementary             | Housekeeper           |
| 6  | 37    | Indigenous localities | Female | 21-49 years | Married/Cohabitation | Elementary             | Housekeeper           |
| 7  | 61    | Indigenous localities | Female | 50-64 years | Married/Cohabitation | Illiteracy             | Housekeeper           |
| 8  |       | Indigenous localities | Female |             | Married/Cohabitation | Elementary             | Housekeeper           |
| 9  | 60    | Indigenous localities | Female | 50-64 years | Widowed              | Elementary             | Housekeeper           |
| 10 | 65    | Indigenous localities | Female | 65-86 years | Separated/Divorced   | Elementary             | Housekeeper           |
| 11 | 52    | Indigenous localities | Female | 50-64 years | Widowed              | Elementary             | Housekeeper           |
| 12 | 51    | Indigenous localities | Female | 50-64 years | Married/Cohabitation | Elementary             | Housekeeper           |
| 13 | 41    | Indigenous localities | Female | 21-49 years | Married/Cohabitation | Elementary             | Housekeeper           |
| 14 | 54    | Indigenous localities | Female | 50-64 years | Married/Cohabitation | Elementary             | Housekeeper           |
| 15 | 59    | Indigenous localities | Female | 50-64 years | Married/Cohabitation | Elementary             | Former or trader      |
| 16 | 79    | Indigenous localities | Female | 65-86 years | Widowed              | Elementary             | Former or trader      |
| 17 | 52    | Indigenous localities | Female | 50-64 years | Single               | Elementary             | Housekeeper           |
| 18 | 54    | Indigenous localities | Female | 50-64 years | Married/Cohabitation | Elementary             | Housekeeper           |
| 19 | 51    | Indigenous localities | Female | 50-64 years | Married/Cohabitation | Illiteracy             | Housekeeper           |
| 20 | 44    | Indigenous localities | Female | 21-49 years | Married/Cohabitation | Elementary             | Housekeeper           |
| 21 | 34    | Indigenous localities | Female | 21-49 years | Married/Cohabitation | Elementary             | Housekeeper           |
| 22 | 37    | Indigenous localities | Female | 21-49 years | Married/Cohabitation | Elementary             | Housekeeper           |
| 23 | 36    | Indigenous localities | Female | 21-49 years | Single               | Higher than elementary | Housekeeper           |
| 24 |       | Indigenous localities | Female |             | Married/Cohabitation | Elementary             | Housekeeper           |
| 25 | 49    | Indigenous localities | Female | 21-49 years | Married/Cohabitation | Elementary             | Housekeeper           |
| 26 |       | Indigenous localities | Female |             | Separated/Divorced   | Elementary             | Housekeeper           |
| 27 | 59    | Indigenous localities | Female | 50-64 years | Married/Cohabitation | Elementary             | Professional or other |
| 28 |       | Indigenous localities | Female |             | Single               | Elementary             | Housekeeper           |
| 29 | 47    | Indigenous localities | Men    | 21-49 years | Married/Cohabitation | Elementary             | Housekeeper           |

|    |    |                       |        |             |                      |            |                  |
|----|----|-----------------------|--------|-------------|----------------------|------------|------------------|
| 30 | 55 | Indigenous localities | Female | 50-64 years | Married/Cohabitation | Elementary | Housekeeper      |
| 31 | 44 | Indigenous localities | Female | 21-49 years | Married/Cohabitation | Elementary | Housekeeper      |
| 32 | 40 | Indigenous localities | Female | 21-49 years | Married/Cohabitation | Elementary | Housekeeper      |
| 33 | 49 | Indigenous localities | Men    | 21-49 years | Married/Cohabitation | Elementary |                  |
| 34 | 75 | Indigenous localities | Female | 65-86 years | Married/Cohabitation | Elementary | Housekeeper      |
| 35 | 52 | Indigenous localities | Female | 50-64 years | Single               | Elementary | Housekeeper      |
| 36 | 28 | Indigenous localities | Female | 21-49 years | Married/Cohabitation | Illiteracy | Housekeeper      |
| 37 | 68 | Indigenous localities | Female | 65-86 years | Married/Cohabitation | Illiteracy | Housekeeper      |
| 38 | 53 | Indigenous localities | Female | 50-64 years | Married/Cohabitation | Illiteracy | Housekeeper      |
| 39 |    | Indigenous localities | Female |             | Married/Cohabitation | Illiteracy | Housekeeper      |
| 40 |    | Indigenous localities | Female |             | Married/Cohabitation | Illiteracy | Housekeeper      |
| 41 | 49 | Indigenous localities | Female | 21-49 years | Married/Cohabitation | Elementary | Housekeeper      |
| 42 | 51 | Indigenous localities | Female | 50-64 years | Married/Cohabitation | Elementary | Housekeeper      |
| 43 | 64 | Indigenous localities | Female | 50-64 years | Married/Cohabitation | Illiteracy | Former or trader |
| 44 | 76 | Indigenous localities | Female | 65-86 years | Married/Cohabitation | Illiteracy | Former or trader |
| 45 | 69 | Indigenous localities | Female | 65-86 years | Married/Cohabitation | Illiteracy | Housekeeper      |
| 46 | 77 | Indigenous localities | Female | 65-86 years | Married/Cohabitation | Illiteracy | Housekeeper      |
| 47 | 61 | Indigenous localities | Female | 50-64 years | Single               | Elementary | Housekeeper      |
| 48 | 42 | Indigenous localities | Men    | 21-49 years | Married/Cohabitation | Elementary | worker           |
| 49 | 54 | Indigenous localities | Female | 50-64 years | Married/Cohabitation | Illiteracy | Housekeeper      |
| 50 |    | Indigenous localities | Female |             | Married/Cohabitation | Illiteracy | Housekeeper      |
| 51 |    | Indigenous localities | Female |             | Married/Cohabitation | Elementary | Housekeeper      |
| 52 |    | Indigenous localities | Men    |             | Married/Cohabitation | Elementary | worker           |
| 53 |    | Indigenous localities | Female |             | Married/Cohabitation | Illiteracy | Housekeeper      |
| 54 |    | Indigenous localities | Female |             | Married/Cohabitation | Illiteracy | Housekeeper      |
| 55 |    | Indigenous localities | Female |             | Married/Cohabitation | Elementary | Housekeeper      |
| 56 | 42 | Indigenous localities | Female | 21-49 years | Married/Cohabitation | Elementary | Housekeeper      |
| 57 | 65 | Indigenous localities | Female | 65-86 years | Married/Cohabitation | Elementary | Housekeeper      |
| 58 | 62 | Indigenous localities | Female | 50-64 years | Married/Cohabitation | Illiteracy | Housekeeper      |
| 59 | 53 | Indigenous localities | Female | 50-64 years | Married/Cohabitation | Illiteracy | Housekeeper      |

|    |    |                       |        |             |                      |            |                  |
|----|----|-----------------------|--------|-------------|----------------------|------------|------------------|
| 60 | 47 | Indigenous localities | Female | 21-49 years | Married/Cohabitation | Illiteracy | Housekeeper      |
| 61 | 69 | Indigenous localities | Female | 65-86 years | Married/Cohabitation | Illiteracy | Housekeeper      |
| 62 |    | Indigenous localities | Female |             | Married/Cohabitation | Illiteracy | Former or trader |
| 63 |    | Indigenous localities | Female |             | Married/Cohabitation | Illiteracy | Former or trader |
| 64 |    | Indigenous localities | Female |             | Married/Cohabitation | Illiteracy | Housekeeper      |
| 65 | 62 | Indigenous localities | Female | 50-64 years | Married/Cohabitation | Elementary | Housekeeper      |
| 66 |    | Indigenous localities | Female |             | Married/Cohabitation | Illiteracy | Housekeeper      |
| 67 | 49 | Indigenous localities | Men    | 21-49 years | Married/Cohabitation | Elementary | Housekeeper      |
| 68 | 56 | Indigenous localities | Female | 50-64 years | Married/Cohabitation | Illiteracy | Housekeeper      |
| 69 |    | Indigenous localities | Female |             | Widowed              | Illiteracy | Housekeeper      |
| 70 | 53 | Indigenous localities | Female | 50-64 years | Married/Cohabitation | Elementary | Housekeeper      |
| 71 |    | Indigenous localities | Female |             | Married/Cohabitation | Illiteracy | Housekeeper      |
| 72 | 64 | Indigenous localities | Female | 50-64 years | Married/Cohabitation | Elementary | Housekeeper      |
| 73 | 50 | Indigenous localities | Female | 50-64 years | Married/Cohabitation | Elementary | Housekeeper      |
| 74 | 49 | Indigenous localities | Female | 21-49 years |                      | Elementary | Housekeeper      |
| 75 | 55 | Indigenous localities | Female | 50-64 years | Married/Cohabitation | Illiteracy | Housekeeper      |
| 76 | 34 | Indigenous localities | Female | 21-49 years | Separated/Divorced   | Elementary | Housekeeper      |
| 77 | 72 | Indigenous localities | Female | 65-86 years | Separated/Divorced   | Elementary | Housekeeper      |
| 78 | 39 | Indigenous localities | Female | 21-49 years | Married/Cohabitation | Elementary | Housekeeper      |
| 79 | 44 | Indigenous localities | Female | 21-49 years | Single               | Elementary | Housekeeper      |
| 80 |    | Indigenous localities | Female |             | Widowed              | Illiteracy | Housekeeper      |
| 81 |    | Indigenous localities | Female |             | Married/Cohabitation | Elementary | Housekeeper      |
| 82 |    | Indigenous localities | Female |             | Married/Cohabitation | Elementary | Housekeeper      |
| 83 | 65 | Indigenous localities | Female | 65-86 years | Married/Cohabitation | Elementary | Housekeeper      |
| 84 | 61 | Indigenous localities | Female | 50-64 years | Widowed              | Illiteracy | Housekeeper      |
| 85 | 72 | Indigenous localities | Female | 65-86 years | Married/Cohabitation | Elementary | Housekeeper      |
| 86 | 34 | Indigenous localities | Female | 21-49 years | Separated/Divorced   | Elementary | Housekeeper      |
| 87 | 47 | Indigenous localities | Female | 21-49 years | Married/Cohabitation | Elementary | Housekeeper      |
| 88 | 46 | Indigenous localities | Female | 21-49 years | Married/Cohabitation | Elementary | Housekeeper      |
| 89 | 57 | Indigenous localities | Female | 50-64 years | Widowed              | Illiteracy | Housekeeper      |

|     |    |                       |        |             |                      |            |                  |
|-----|----|-----------------------|--------|-------------|----------------------|------------|------------------|
| 90  | 52 | Indigenous localities | Female | 50-64 years | Married/Cohabitation | Illiteracy | Housekeeper      |
| 91  | 63 | Indigenous localities | Female | 50-64 years | Married/Cohabitation | Illiteracy | Housekeeper      |
| 92  | 55 | Indigenous localities | Female | 50-64 years | Married/Cohabitation | Illiteracy | Housekeeper      |
| 93  | 44 | Indigenous localities | Female | 21-49 years | Married/Cohabitation | Illiteracy | Housekeeper      |
| 94  | 55 | Indigenous localities | Female | 50-64 years | Married/Cohabitation | Illiteracy | Housekeeper      |
| 95  | 69 | Indigenous localities | Female | 65-86 years | Widowed              | Illiteracy | Housekeeper      |
| 96  |    | Indigenous localities | Female |             | Widowed              | Elementary | Housekeeper      |
| 97  |    | Indigenous localities | Female |             | Married/Cohabitation | Illiteracy | Housekeeper      |
| 98  | 50 | Indigenous localities | Men    | 50-64 years | Separated/Divorced   | Elementary | worker           |
| 99  | 51 | Indigenous localities | Female | 50-64 years | Widowed              | Elementary | Housekeeper      |
| 100 | 59 | Indigenous localities | Female | 50-64 years | Married/Cohabitation | Elementary | Housekeeper      |
| 101 |    | Indigenous localities | Female |             | Married/Cohabitation | Illiteracy | Housekeeper      |
| 102 |    | Indigenous localities | Female |             | Married/Cohabitation | Illiteracy | Housekeeper      |
| 103 |    | Indigenous localities | Female |             | Married/Cohabitation | Illiteracy |                  |
| 104 | 66 | Indigenous localities | Men    | 65-86 years | Married/Cohabitation | Elementary | Former or trader |
| 105 | 50 | Indigenous localities | Female | 50-64 years | Married/Cohabitation | Illiteracy | Housekeeper      |
| 106 | 58 | Indigenous localities | Men    | 50-64 years | Married/Cohabitation | Elementary | Housekeeper      |
| 107 | 42 | Urban area            | Female | 21-49 years | Married/Cohabitation | Elementary | Housekeeper      |
| 108 | 71 | Urban area            | Female | 65-86 years | Widowed              | Elementary | Housekeeper      |
| 109 | 56 | Indigenous localities | Female | 50-64 years | Widowed              | Illiteracy | Housekeeper      |
| 110 | 54 | Indigenous localities | Men    | 50-64 years | Married/Cohabitation | Elementary | Former or trader |
| 111 | 43 | Indigenous localities | Female | 21-49 years | Married/Cohabitation | Illiteracy |                  |
| 112 | 62 | Indigenous localities | Female | 50-64 years | Single               | Illiteracy | Housekeeper      |
| 113 | 41 | Indigenous localities | Female | 21-49 years | Married/Cohabitation | Elementary | Housekeeper      |
| 114 | 47 | Indigenous localities | Men    | 21-49 years | Married/Cohabitation | Elementary | Former or trader |
| 115 | 42 | Indigenous localities | Female | 21-49 years | Separated/Divorced   | Illiteracy | worker           |
| 116 | 48 | Indigenous localities | Female | 21-49 years | Separated/Divorced   | Illiteracy | Housekeeper      |
| 117 | 52 | Indigenous localities | Female | 50-64 years | Separated/Divorced   | Elementary | Housekeeper      |
| 118 | 66 | Indigenous localities | Men    | 65-86 years | Married/Cohabitation | Elementary | Former or trader |
| 119 | 60 | Indigenous localities | Female | 50-64 years | Married/Cohabitation | Illiteracy | Housekeeper      |

|     |    |                       |        |             |                      |            |                       |
|-----|----|-----------------------|--------|-------------|----------------------|------------|-----------------------|
| 120 | 68 | Indigenous localities | Female | 65-86 years | Widowed              | Illiteracy | Housekeeper           |
| 121 | 62 | Indigenous localities | Female | 50-64 years | Married/Cohabitation | Illiteracy | Housekeeper           |
| 122 | 64 | Indigenous localities | Female | 50-64 years | Widowed              | Illiteracy | Housekeeper           |
| 123 | 67 | Indigenous localities | Female | 65-86 years | Married/Cohabitation | Illiteracy | Housekeeper           |
| 124 | 53 | Indigenous localities | Female | 50-64 years | Widowed              | Elementary | Housekeeper           |
| 125 | 73 | Indigenous localities | Female | 65-86 years | Married/Cohabitation | Illiteracy | Housekeeper           |
| 126 | 66 | Indigenous localities | Female | 65-86 years | Widowed              | Illiteracy | Housekeeper           |
| 127 | 51 | Indigenous localities | Female | 50-64 years | Married/Cohabitation | Illiteracy | Housekeeper           |
| 128 | 65 | Indigenous localities | Female | 65-86 years | Widowed              | Illiteracy | Housekeeper           |
| 129 | 44 | Indigenous localities | Female | 21-49 years | Married/Cohabitation | Illiteracy | Housekeeper           |
| 130 | 41 | Indigenous localities | Female | 21-49 years | Married/Cohabitation | Illiteracy | Housekeeper           |
| 131 | 53 | Indigenous localities | Female | 50-64 years | Married/Cohabitation | Illiteracy | Housekeeper           |
| 132 | 56 | Indigenous localities | Female | 50-64 years | Married/Cohabitation | Elementary | Housekeeper           |
| 133 | 48 | Indigenous localities | Female | 21-49 years | Separated/Divorced   | Elementary | Professional or other |
| 134 | 76 | Indigenous localities | Female | 65-86 years | Widowed              | Illiteracy | Housekeeper           |
| 135 | 56 | Indigenous localities | Men    | 50-64 years | Married/Cohabitation | Elementary | Former or trader      |
| 136 | 64 | Indigenous localities | Female | 50-64 years | Married/Cohabitation | Illiteracy | Housekeeper           |
| 137 | 48 | Indigenous localities | Men    | 21-49 years | Married/Cohabitation | Elementary | Professional or other |
| 138 | 56 | Indigenous localities | Female | 50-64 years | Widowed              | Elementary | Housekeeper           |
| 139 | 63 | Indigenous localities | Men    | 50-64 years | Widowed              | Elementary | Former or trader      |
| 140 | 58 | Indigenous localities | Female | 50-64 years | Married/Cohabitation | Illiteracy | Housekeeper           |
| 141 | 62 | Indigenous localities | Female | 50-64 years | Single               | Elementary | Former or trader      |
| 142 | 59 | Indigenous localities | Female | 50-64 years | Married/Cohabitation | Elementary | Housekeeper           |
| 143 | 58 | Indigenous localities | Female | 50-64 years | Married/Cohabitation | Illiteracy | Housekeeper           |
| 144 | 52 | Indigenous localities | Female | 50-64 years | Separated/Divorced   | Elementary | Housekeeper           |
| 145 |    | Indigenous localities | Female |             | Married/Cohabitation | Illiteracy | Housekeeper           |
| 146 | 36 | Indigenous localities | Female | 21-49 years | Single               | Illiteracy | Housekeeper           |
| 147 | 44 | Indigenous localities | Female | 21-49 years | Married/Cohabitation | Elementary | Housekeeper           |
| 148 | 37 | Indigenous localities | Female | 21-49 years | Single               | Elementary | Housekeeper           |
| 149 | 59 | Indigenous localities | Female | 50-64 years | Married/Cohabitation | Elementary | Housekeeper           |

|     |    |                       |        |             |                      |                        |                       |
|-----|----|-----------------------|--------|-------------|----------------------|------------------------|-----------------------|
| 150 | 62 | Indigenous localities | Female | 50-64 years | Married/Cohabitation | Illiteracy             | Housekeeper           |
| 151 | 71 | Indigenous localities | Female | 65-86 years | Married/Cohabitation | Illiteracy             | Housekeeper           |
| 152 | 63 | Indigenous localities | Female | 50-64 years | Married/Cohabitation | Illiteracy             | Housekeeper           |
| 153 | 66 | Indigenous localities | Female | 65-86 years | Widowed              | Illiteracy             | Former or trader      |
| 154 | 50 | Indigenous localities | Female | 50-64 years | Separated/Divorced   | Elementary             | Housekeeper           |
| 155 | 42 | Indigenous localities | Female | 21-49 years | Married/Cohabitation | Elementary             | Former or trader      |
| 156 | 56 | Indigenous localities | Female | 50-64 years | Married/Cohabitation | Illiteracy             | Housekeeper           |
| 157 | 48 | Indigenous localities | Female | 21-49 years | Separated/Divorced   | Elementary             | worker                |
| 158 | 47 | Urban area            | Female | 21-49 years | Married/Cohabitation | Higher than elementary | Professional or other |
| 159 | 72 | Urban area            | Men    | 65-86 years | Married/Cohabitation | Elementary             | Housekeeper           |
| 160 | 67 | Urban area            | Female | 65-86 years | Separated/Divorced   | Elementary             | Housekeeper           |
| 161 | 79 | Urban area            | Female | 65-86 years | Widowed              | Elementary             | Housekeeper           |
| 162 | 68 | Urban area            | Female | 65-86 years | Married/Cohabitation | Elementary             | Housekeeper           |
| 163 | 70 | Urban area            | Female | 65-86 years | Widowed              | Elementary             | Housekeeper           |
| 164 | 59 | Urban area            | Female | 50-64 years | Separated/Divorced   | Higher than elementary | Professional or other |
| 165 | 81 | Urban area            | Female | 65-86 years | Widowed              | Higher than elementary | Housekeeper           |
| 166 | 69 | Urban area            | Female | 65-86 years | Married/Cohabitation | Elementary             | Housekeeper           |
| 167 | 65 | Urban area            | Men    | 65-86 years | Married/Cohabitation | Elementary             | Housekeeper           |
| 168 | 68 | Urban area            | Men    | 65-86 years | Married/Cohabitation | Illiteracy             | Professional or other |
| 169 | 75 | Urban area            | Female | 65-86 years | Married/Cohabitation | Higher than elementary | Housekeeper           |
| 170 | 54 | Urban area            | Female | 50-64 years | Married/Cohabitation | Elementary             | Professional or other |
| 171 | 63 | Urban area            | Female | 50-64 years | Widowed              | Higher than elementary | Professional or other |
| 172 | 45 | Urban area            | Men    | 21-49 years | Married/Cohabitation | Higher than elementary | Professional or other |
| 173 | 55 | Urban area            | Men    | 50-64 years | Married/Cohabitation | Elementary             | Professional or other |
| 174 | 63 | Urban area            | Female | 50-64 years | Married/Cohabitation | Illiteracy             | Housekeeper           |
| 175 | 51 | Urban area            | Men    | 50-64 years | Married/Cohabitation | Higher than elementary | Professional or other |
| 176 | 57 | Urban area            | Female | 50-64 years | Married/Cohabitation | Elementary             | Housekeeper           |
| 177 | 39 | Urban area            | Female | 21-49 years | Married/Cohabitation | Higher than elementary | Professional or other |
| 178 | 65 | Urban area            | Female | 65-86 years | Married/Cohabitation | Elementary             | Housekeeper           |
| 179 |    | Urban area            | Female |             | Married/Cohabitation | Elementary             | Housekeeper           |

|     |    |                       |        |             |                      |                        |                       |
|-----|----|-----------------------|--------|-------------|----------------------|------------------------|-----------------------|
| 180 | 44 | Urban area            | Men    | 21-49 years | Married/Cohabitation | Higher than elementary | Professional or other |
| 181 | 79 | Urban area            | Female | 65-86 years | Widowed              | Elementary             | Housekeeper           |
| 182 | 44 | Urban area            | Female | 21-49 years | Married/Cohabitation | Higher than elementary | Professional or other |
| 183 | 55 | Urban area            | Female | 50-64 years | Married/Cohabitation | Elementary             | Housekeeper           |
| 184 | 56 | Urban area            | Men    | 50-64 years | Married/Cohabitation | Elementary             | Housekeeper           |
| 185 | 67 | Urban area            | Men    | 65-86 years | Married/Cohabitation | Elementary             | Former or trader      |
| 186 | 41 | Urban area            | Female | 21-49 years | Married/Cohabitation | Higher than elementary | Housekeeper           |
| 187 | 50 | Urban area            | Female | 50-64 years | Married/Cohabitation | Higher than elementary | Professional or other |
| 188 | 63 | Urban area            | Female | 50-64 years | Separated/Divorced   | Illiteracy             | Housekeeper           |
| 189 | 79 | Urban area            | Men    | 65-86 years | Married/Cohabitation | Elementary             | Housekeeper           |
| 190 | 45 | Urban area            | Female | 21-49 years | Married/Cohabitation | Higher than elementary | Professional or other |
| 191 | 56 | Urban area            | Men    | 50-64 years | Separated/Divorced   | Elementary             | Professional or other |
| 192 | 51 | Urban area            | Female | 50-64 years | Separated/Divorced   | Higher than elementary | Professional or other |
| 193 | 66 | Urban area            | Men    | 65-86 years | Married/Cohabitation | Higher than elementary | Former or trader      |
| 194 | 56 | Urban area            | Female | 50-64 years | Married/Cohabitation | Elementary             | Housekeeper           |
| 195 | 49 | Urban area            | Female | 21-49 years | Separated/Divorced   | Elementary             | Housekeeper           |
| 196 | 67 | Urban area            | Female | 65-86 years | Married/Cohabitation | Elementary             | Housekeeper           |
| 197 | 80 | Urban area            | Female | 65-86 years | Widowed              | Illiteracy             | Housekeeper           |
| 198 | 53 | Urban area            | Female | 50-64 years | Married/Cohabitation | Higher than elementary | Professional or other |
| 199 | 54 | Urban area            | Men    | 50-64 years | Married/Cohabitation | Higher than elementary | Professional or other |
| 200 | 73 | Urban area            | Men    | 65-86 years | Married/Cohabitation | Higher than elementary | Professional or other |
| 201 | 50 | Urban area            | Men    | 50-64 years | Married/Cohabitation | Illiteracy             | Former or trader      |
| 202 | 40 | Urban area            | Female | 21-49 years | Married/Cohabitation | Elementary             | Former or trader      |
| 203 | 71 | Urban area            | Female | 65-86 years | Widowed              | Elementary             | Housekeeper           |
| 204 | 69 | Urban area            | Men    | 65-86 years | Married/Cohabitation | Higher than elementary | Professional or other |
| 205 | 64 | Urban area            | Female | 50-64 years | Married/Cohabitation | Elementary             | Former or trader      |
| 206 | 54 | Urban area            | Female | 50-64 years | Separated/Divorced   | Elementary             | Housekeeper           |
| 207 | 72 | Urban area            | Female | 65-86 years | Single               | Illiteracy             | Housekeeper           |
| 208 | 78 | Urban area            | Female | 65-86 years | Widowed              | Elementary             | Housekeeper           |
| 209 | 69 | Indigenous localities | Female | 65-86 years | Married/Cohabitation | Elementary             | Housekeeper           |

|     |    |                       |        |             |                      |                        |                       |
|-----|----|-----------------------|--------|-------------|----------------------|------------------------|-----------------------|
| 210 | 66 | Indigenous localities | Female | 65-86 years | Separated/Divorced   | Elementary             | Housekeeper           |
| 211 | 57 | Indigenous localities | Men    | 50-64 years | Married/Cohabitation | Higher than elementary | Professional or other |
| 212 | 52 | Indigenous localities | Men    | 50-64 years | Married/Cohabitation | Higher than elementary | Professional or other |
| 213 | 51 | Indigenous localities | Female | 50-64 years | Married/Cohabitation | Higher than elementary | Professional or other |
| 214 | 57 | Indigenous localities | Female | 50-64 years | Married/Cohabitation | Elementary             | Former or trader      |
| 215 | 71 | Indigenous localities | Female | 65-86 years | Married/Cohabitation | Elementary             | Housekeeper           |
| 216 | 52 | Indigenous localities | Female | 50-64 years | Married/Cohabitation | Elementary             | Housekeeper           |
| 217 | 42 | Indigenous localities | Female | 21-49 years | Married/Cohabitation | Higher than elementary | Housekeeper           |
| 218 | 60 | Indigenous localities | Female | 50-64 years | Married/Cohabitation | Elementary             | Housekeeper           |
| 219 | 70 | Indigenous localities | Men    | 65-86 years | Married/Cohabitation | Higher than elementary | Former or trader      |
| 220 | 65 | Indigenous localities | Female | 65-86 years | Married/Cohabitation | Illiteracy             | Housekeeper           |
| 221 | 72 | Indigenous localities | Female | 65-86 years | Married/Cohabitation | Illiteracy             | Housekeeper           |
| 222 | 59 | Indigenous localities | Female | 50-64 years | Married/Cohabitation | Elementary             | Housekeeper           |
| 223 | 71 | Indigenous localities | Men    | 65-86 years | Married/Cohabitation | Elementary             | Housekeeper           |
| 224 | 86 | Indigenous localities | Female | 65-86 years | Married/Cohabitation | Illiteracy             | Housekeeper           |
| 225 | 68 | Indigenous localities | Men    | 65-86 years | Married/Cohabitation | Elementary             |                       |
| 226 | 67 | Indigenous localities | Female | 65-86 years | Married/Cohabitation | Elementary             | Housekeeper           |
| 227 | 62 | Indigenous localities | Men    | 50-64 years | Married/Cohabitation | Elementary             |                       |
| 228 | 63 | Indigenous localities | Men    | 50-64 years | Separated/Divorced   | Elementary             | Former or trader      |
| 229 | 50 | Indigenous localities | Female | 50-64 years | Married/Cohabitation | Elementary             | Housekeeper           |
| 230 | 68 | Indigenous localities | Female | 65-86 years | Widowed              | Illiteracy             | Former or trader      |
| 231 | 55 | Indigenous localities | Men    | 50-64 years | Separated/Divorced   | Higher than elementary | Professional or other |
| 232 | 79 | Indigenous localities | Men    | 65-86 years | Married/Cohabitation | Higher than elementary | Professional or other |
| 233 | 50 | Indigenous localities | Men    | 50-64 years | Married/Cohabitation | Elementary             | worker                |
| 234 | 67 | Indigenous localities | Female | 65-86 years | Widowed              | Elementary             | Housekeeper           |
| 235 | 50 | Indigenous localities | Female | 50-64 years | Married/Cohabitation | Elementary             | Housekeeper           |
| 236 | 80 | Indigenous localities | Men    | 65-86 years | Married/Cohabitation | Elementary             | Housekeeper           |
| 237 | 60 | Indigenous localities | Men    | 50-64 years | Married/Cohabitation | Elementary             | Professional or other |
| 238 | 63 | Indigenous localities | Female | 50-64 years | Separated/Divorced   | Illiteracy             | worker                |
| 239 | 60 | Indigenous localities | Female | 50-64 years | Single               | Higher than elementary | Housekeeper           |



|     |    |                       |        |             |                      |                        |                       |
|-----|----|-----------------------|--------|-------------|----------------------|------------------------|-----------------------|
| 240 | 41 | Indigenous localities | Female | 21-49 years | Married/Cohabitation | Elementary             | Housekeeper           |
| 241 | 56 | Indigenous localities | Men    | 50-64 years | Married/Cohabitation | Higher than elementary | Professional or other |
| 242 | 61 | Indigenous localities | Female | 50-64 years | Married/Cohabitation | Elementary             | Housekeeper           |
| 243 | 57 | Indigenous localities | Female | 50-64 years | Married/Cohabitation | Elementary             | Housekeeper           |
| 244 | 72 | Indigenous localities | Female | 65-86 years | Widowed              | Higher than elementary | Professional or other |
| 245 | 65 | Indigenous localities | Female | 65-86 years | Married/Cohabitation | Elementary             | Former or trader      |
| 246 | 81 | Indigenous localities | Female | 65-86 years | Married/Cohabitation | Illiteracy             | Professional or other |
| 247 | 74 | Indigenous localities | Female | 65-86 years | Married/Cohabitation | Elementary             | Housekeeper           |
| 248 | 60 | Indigenous localities | Female | 50-64 years | Married/Cohabitation | Higher than elementary | Former or trader      |
| 249 | 54 | Rural area            | Female | 50-64 years | Married/Cohabitation | Elementary             | Housekeeper           |
| 250 | 66 | Rural area            | Female | 65-86 years | Married/Cohabitation | Elementary             | Housekeeper           |
| 251 | 61 | Rural area            | Female | 50-64 years | Married/Cohabitation | Elementary             | Housekeeper           |
| 252 | 63 | Rural area            | Female | 50-64 years | Married/Cohabitation | Elementary             | Housekeeper           |
| 253 | 37 | Rural area            | Female | 21-49 years | Married/Cohabitation | Elementary             | Housekeeper           |
| 254 | 64 | Rural area            | Female | 50-64 years | Married/Cohabitation | Elementary             | Housekeeper           |
| 255 | 66 | Rural area            | Female | 65-86 years | Widowed              | Illiteracy             | Housekeeper           |
| 256 | 56 | Rural area            | Men    | 50-64 years | Married/Cohabitation | Elementary             | worker                |
| 257 | 75 | Rural area            | Female | 65-86 years | Widowed              | Elementary             | Housekeeper           |
| 258 | 62 | Rural area            | Female | 50-64 years | Widowed              | Elementary             | Housekeeper           |
| 259 | 44 | Rural area            | Female | 21-49 years | Married/Cohabitation | Elementary             | Housekeeper           |
| 260 | 67 | Rural area            | Female | 65-86 years | Widowed              | Elementary             | Housekeeper           |
| 261 | 62 | Rural area            | Men    | 50-64 years | Married/Cohabitation | Elementary             | Former or trader      |
| 262 | 63 | Rural area            | Female | 50-64 years | Single               | Elementary             | Former or trader      |
| 263 | 69 | Rural area            | Female | 65-86 years | Widowed              | Elementary             | Housekeeper           |
| 264 | 61 | Rural area            | Men    | 50-64 years | Married/Cohabitation | Elementary             | Former or trader      |
| 265 | 69 | Rural area            | Female | 65-86 years | Married/Cohabitation | Illiteracy             | Housekeeper           |
| 266 | 47 | Rural area            | Female | 21-49 years | Widowed              | Elementary             | Housekeeper           |
| 267 | 64 | Rural area            | Female | 50-64 years | Married/Cohabitation | Illiteracy             | Housekeeper           |
| 268 | 59 | Rural area            | Female | 50-64 years | Married/Cohabitation | Elementary             | Housekeeper           |
| 269 | 61 | Rural area            | Female | 50-64 years | Widowed              | Elementary             | Housekeeper           |

|     |    |            |        |             |                      |            |                       |
|-----|----|------------|--------|-------------|----------------------|------------|-----------------------|
| 270 | 69 | Rural area | Female | 65-86 years | Widowed              | Illiteracy | Housekeeper           |
| 271 | 64 | Rural area | Female | 50-64 years | Married/Cohabitation | Elementary | Housekeeper           |
| 272 | 44 | Rural area | Female | 21-49 years | Single               | Elementary | Professional or other |
| 273 | 48 | Rural area | Female | 21-49 years | Married/Cohabitation | Illiteracy | Housekeeper           |
| 274 | 64 | Rural area | Female | 50-64 years | Widowed              | Elementary | Housekeeper           |
| 275 | 50 | Rural area | Female | 50-64 years | Married/Cohabitation | Elementary | Housekeeper           |
| 276 | 59 | Urban area | Men    | 50-64 years | Married/Cohabitation | Elementary | Professional or other |
| 277 | 60 | Urban area | Female | 50-64 years | Married/Cohabitation | Elementary | Housekeeper           |
| 278 | 48 | Urban area | Female | 21-49 years | Single               | Elementary | Housekeeper           |
| 279 | 53 | Urban area | Men    | 50-64 years | Married/Cohabitation | Elementary | Former or trader      |
| 280 | 60 | Urban area | Men    | 50-64 years | Single               | Elementary | Housekeeper           |
| 281 | 66 | Rural area | Female | 65-86 years | Married/Cohabitation | Illiteracy | Housekeeper           |
| 282 | 70 | Rural area | Men    | 65-86 years | Married/Cohabitation | Elementary | Former or trader      |
| 283 | 52 | Rural area | Female | 50-64 years | Married/Cohabitation | Elementary | Housekeeper           |
| 284 | 65 | Rural area | Female | 65-86 years | Married/Cohabitation | Elementary | Housekeeper           |
| 285 | 69 | Rural area | Female | 65-86 years | Married/Cohabitation | Elementary | Housekeeper           |
| 286 | 53 | Rural area | Female | 50-64 years | Married/Cohabitation | Illiteracy | Housekeeper           |
| 287 | 55 | Rural area | Female | 50-64 years | Married/Cohabitation | Elementary | Housekeeper           |
| 288 | 60 | Rural area | Men    | 50-64 years | Married/Cohabitation | Elementary | Professional or other |
| 289 | 49 | Urban area | Female | 21-49 years | Married/Cohabitation | Illiteracy | Housekeeper           |
| 290 | 60 | Urban area | Female | 50-64 years | Married/Cohabitation | Elementary | Housekeeper           |
| 291 | 40 | Urban area | Men    | 21-49 years | Married/Cohabitation | Elementary | Former or trader      |
| 292 | 59 | Urban area | Men    | 50-64 years | Married/Cohabitation | Elementary | Professional or other |
| 293 | 63 | Urban area | Female | 50-64 years | Widowed              | Illiteracy | Housekeeper           |
| 294 | 48 | Rural area | Female | 21-49 years | Married/Cohabitation | Elementary | Housekeeper           |
| 295 | 64 | Urban area | Female | 50-64 years | Widowed              | Illiteracy | Housekeeper           |
| 296 | 47 | Urban area | Men    | 21-49 years | Married/Cohabitation | Elementary | Housekeeper           |
| 297 | 61 | Rural area | Female | 50-64 years | Married/Cohabitation | Illiteracy | Housekeeper           |
| 298 | 55 | Urban area | Men    | 50-64 years | Married/Cohabitation | Elementary | Former or trader      |
| 299 |    | Urban area | Female |             |                      |            | Housekeeper           |

|     |    |            |        |             |                      |            |                       |
|-----|----|------------|--------|-------------|----------------------|------------|-----------------------|
| 300 | 71 | Urban area | Female | 65-86 years | Widowed              | Elementary | Housekeeper           |
| 301 | 64 | Urban area | Female | 50-64 years | Widowed              | Illiteracy | Housekeeper           |
| 302 | 43 | Urban area | Female | 21-49 years | Married/Cohabitation | Elementary | Housekeeper           |
| 303 | 62 | Urban area | Men    | 50-64 years | Married/Cohabitation | Elementary | Professional or other |
| 304 | 66 | Urban area | Men    | 65-86 years | Married/Cohabitation | Illiteracy | Former or trader      |
| 305 | 68 | Urban area | Female | 65-86 years | Married/Cohabitation | Illiteracy | Housekeeper           |
| 306 | 68 | Urban area | Female | 65-86 years | Widowed              | Elementary | Housekeeper           |
| 307 | 61 | Urban area | Female | 50-64 years | Married/Cohabitation | Elementary | Housekeeper           |
| 308 | 63 | Urban area | Men    | 50-64 years | Married/Cohabitation | Elementary | Housekeeper           |
| 309 | 56 | Urban area | Female | 50-64 years | Married/Cohabitation | Elementary | Housekeeper           |
| 310 | 50 | Urban area | Female | 50-64 years | Married/Cohabitation | Elementary | Housekeeper           |
| 311 | 55 | Urban area | Female | 50-64 years | Married/Cohabitation | Elementary | Housekeeper           |
| 312 | 62 | Urban area | Men    | 50-64 years | Single               | Elementary | Professional or other |
| 313 |    | Urban area | Men    |             | Single               | Elementary | Professional or other |
| 314 | 69 | Urban area | Men    | 65-86 years | Married/Cohabitation | Elementary | Professional or other |
| 315 | 48 | Urban area | Female | 21-49 years | Married/Cohabitation | Elementary | Housekeeper           |
| 316 | 52 | Urban area | Female | 50-64 years | Married/Cohabitation | Elementary | Housekeeper           |
| 317 | 59 | Urban area | Men    | 50-64 years | Married/Cohabitation | Elementary | Former or trader      |
| 318 | 54 | Urban area | Female | 50-64 years | Married/Cohabitation | Illiteracy | Housekeeper           |
| 319 | 66 | Urban area | Men    | 65-86 years | Married/Cohabitation | Elementary | Professional or other |
| 320 | 45 | Urban area | Female | 21-49 years | Married/Cohabitation | Elementary | Housekeeper           |
| 321 | 38 | Urban area | Female | 21-49 years | Married/Cohabitation | Elementary | Housekeeper           |
| 322 | 67 | Urban area | Female | 65-86 years | Married/Cohabitation | Elementary | Housekeeper           |
| 323 | 58 | Urban area | Female | 50-64 years | Married/Cohabitation | Elementary | Housekeeper           |
| 324 | 63 | Urban area | Female | 50-64 years | Widowed              | Elementary | Professional or other |
| 325 | 45 | Urban area | Female | 21-49 years | Single               | Elementary | Housekeeper           |
| 326 | 69 | Urban area | Men    | 65-86 years | Married/Cohabitation | Elementary | Former or trader      |
| 327 | 66 | Urban area | Female | 65-86 years | Married/Cohabitation | Elementary | Housekeeper           |
| 328 | 59 | Urban area | Female | 50-64 years | Married/Cohabitation | Elementary | Housekeeper           |
| 329 | 53 | Urban area | Female | 50-64 years | Married/Cohabitation | Elementary | Housekeeper           |

|     |    |            |        |             |                      |                        |                       |
|-----|----|------------|--------|-------------|----------------------|------------------------|-----------------------|
| 330 | 45 | Urban area | Female | 21-49 years | Married/Cohabitation | Elementary             | Housekeeper           |
| 331 | 59 | Urban area | Female | 50-64 years | Married/Cohabitation | Elementary             | Housekeeper           |
| 332 |    | Urban area | Female |             | Married/Cohabitation | Elementary             | Housekeeper           |
| 333 | 61 | Urban area | Female | 50-64 years | Widowed              | Elementary             | Housekeeper           |
| 334 | 43 | Urban area | Female | 21-49 years | Married/Cohabitation | Elementary             | Housekeeper           |
| 335 | 48 | Urban area | Female | 21-49 years | Married/Cohabitation | Elementary             | Housekeeper           |
| 336 | 53 | Urban area | Female | 50-64 years | Married/Cohabitation | Elementary             | Housekeeper           |
| 337 | 47 | Urban area | Men    | 21-49 years | Married/Cohabitation | Elementary             | worker                |
| 338 | 46 | Urban area | Female | 21-49 years | Married/Cohabitation | Elementary             | Housekeeper           |
| 339 | 59 | Urban area | Female | 50-64 years | Married/Cohabitation | Elementary             | Housekeeper           |
| 340 | 46 | Urban area | Female | 21-49 years | Married/Cohabitation | Elementary             |                       |
| 341 | 56 | Urban area | Female | 50-64 years | Separated/Divorced   | Elementary             | Housekeeper           |
| 342 | 47 | Urban area | Female | 21-49 years | Married/Cohabitation | Elementary             | Housekeeper           |
| 343 | 44 | Urban area | Female | 21-49 years | Married/Cohabitation | Elementary             | Housekeeper           |
| 344 | 62 | Urban area | Female | 50-64 years | Single               | Illiteracy             | Housekeeper           |
| 345 | 51 | Urban area | Men    | 50-64 years | Married/Cohabitation | Elementary             | Professional or other |
| 346 | 53 | Urban area | Men    | 50-64 years | Single               | Elementary             |                       |
| 347 | 30 | Urban area | Female | 21-49 years | Married/Cohabitation | Elementary             | Housekeeper           |
| 348 | 60 | Urban area | Female | 50-64 years | Married/Cohabitation | Illiteracy             | Housekeeper           |
| 349 | 68 | Urban area | Female | 65-86 years | Single               | Elementary             | Housekeeper           |
| 350 | 52 | Urban area | Female | 50-64 years | Married/Cohabitation | Elementary             | Housekeeper           |
| 351 | 44 | Urban area | Female | 21-49 years | Married/Cohabitation | Higher than elementary | Housekeeper           |
| 352 | 53 | Urban area | Female | 50-64 years | Married/Cohabitation | Higher than elementary | Housekeeper           |
| 353 | 52 | Urban area | Female | 50-64 years | Married/Cohabitation | Elementary             | Housekeeper           |
| 354 | 63 | Urban area | Female | 50-64 years | Married/Cohabitation | Elementary             | Housekeeper           |
| 355 | 32 | Urban area | Female | 21-49 years | Married/Cohabitation | Elementary             | Housekeeper           |
| 356 | 47 | Urban area | Female | 21-49 years | Married/Cohabitation | Elementary             | Housekeeper           |
| 357 | 54 | Urban area | Female | 50-64 years | Separated/Divorced   | Elementary             | Housekeeper           |
| 358 | 48 | Urban area | Female | 21-49 years | Single               | Elementary             | Housekeeper           |
| 359 | 66 | Urban area | Female | 65-86 years | Widowed              | Elementary             | Housekeeper           |

|     |    |            |        |             |                      |                        |                       |
|-----|----|------------|--------|-------------|----------------------|------------------------|-----------------------|
| 360 | 50 | Urban area | Female | 50-64 years | Separated/Divorced   | Elementary             | Housekeeper           |
| 361 | 54 | Urban area | Female | 50-64 years | Married/Cohabitation | Elementary             | Housekeeper           |
| 362 | 60 | Urban area | Female | 50-64 years | Married/Cohabitation | Elementary             | Housekeeper           |
| 363 | 69 | Urban area | Female | 65-86 years | Married/Cohabitation | Elementary             | Housekeeper           |
| 364 | 45 | Urban area | Female | 21-49 years | Married/Cohabitation | Elementary             | Housekeeper           |
| 365 | 67 | Urban area | Female | 65-86 years | Widowed              | Elementary             | Housekeeper           |
| 366 | 68 | Urban area | Female | 65-86 years | Widowed              | Elementary             | Housekeeper           |
| 367 | 44 | Urban area | Female | 21-49 years | Married/Cohabitation | Elementary             | Housekeeper           |
| 368 | 69 | Urban area | Female | 65-86 years | Widowed              | Elementary             | Housekeeper           |
| 369 | 60 | Urban area | Female | 50-64 years | Married/Cohabitation | Elementary             | Housekeeper           |
| 370 | 66 | Urban area | Female | 65-86 years | Married/Cohabitation | Elementary             | Former or trader      |
| 371 | 64 | Urban area | Female | 50-64 years | Separated/Divorced   | Elementary             | Former or trader      |
| 372 | 68 | Urban area | Men    | 65-86 years | Married/Cohabitation | Higher than elementary | Housekeeper           |
| 373 | 40 | Urban area | Female | 21-49 years | Married/Cohabitation | Elementary             | Housekeeper           |
| 374 | 50 | Urban area | Men    | 50-64 years | Married/Cohabitation | Higher than elementary | Former or trader      |
| 375 | 47 | Urban area | Female | 21-49 years | Married/Cohabitation | Elementary             | Former or trader      |
| 376 | 40 | Urban area | Female | 21-49 years | Married/Cohabitation | Elementary             | Housekeeper           |
| 377 | 52 | Urban area | Female | 50-64 years | Married/Cohabitation | Elementary             | Housekeeper           |
| 378 | 46 | Urban area | Female | 21-49 years | Married/Cohabitation | Elementary             | Housekeeper           |
| 379 | 56 | Urban area | Female | 50-64 years | Married/Cohabitation | Elementary             | Housekeeper           |
| 380 | 54 | Urban area | Men    | 50-64 years | Married/Cohabitation | Elementary             | Professional or other |
| 381 | 64 | Urban area | Men    | 50-64 years | Married/Cohabitation | Elementary             | Professional or other |
| 382 | 38 | Urban area | Female | 21-49 years | Married/Cohabitation | Elementary             | Housekeeper           |
| 383 | 45 | Urban area | Female | 21-49 years | Married/Cohabitation | Elementary             | Housekeeper           |
| 384 | 42 | Urban area | Female | 21-49 years | Married/Cohabitation | Elementary             | Housekeeper           |
| 385 | 64 | Urban area | Men    | 50-64 years | Married/Cohabitation | Elementary             | Former or trader      |
| 386 | 69 | Urban area | Female | 65-86 years | Married/Cohabitation | Elementary             | Housekeeper           |
| 387 | 64 | Urban area | Female | 50-64 years | Separated/Divorced   | Elementary             | Housekeeper           |
| 388 | 65 | Urban area | Female | 65-86 years | Married/Cohabitation | Elementary             | Housekeeper           |
| 389 | 55 | Urban area | Female | 50-64 years | Separated/Divorced   | Higher than elementary | Housekeeper           |

|     |    |            |        |             |                      |                        |                       |
|-----|----|------------|--------|-------------|----------------------|------------------------|-----------------------|
| 390 | 44 | Urban area | Female | 21-49 years | Married/Cohabitation | Elementary             | Housekeeper           |
| 391 | 56 | Urban area | Female | 50-64 years | Married/Cohabitation | Elementary             | Former or trader      |
| 392 | 67 | Urban area | Female | 65-86 years | Married/Cohabitation | Elementary             | Housekeeper           |
| 393 | 40 | Urban area | Female | 21-49 years | Married/Cohabitation | Elementary             | Housekeeper           |
| 394 | 67 | Urban area | Female | 65-86 years | Widowed              | Elementary             | Housekeeper           |
| 395 | 54 | Urban area | Female | 50-64 years | Married/Cohabitation | Elementary             | Housekeeper           |
| 396 | 65 | Urban area | Female | 65-86 years | Separated/Divorced   | Elementary             | Housekeeper           |
| 397 | 45 | Urban area | Female | 21-49 years | Married/Cohabitation | Elementary             | Housekeeper           |
| 398 | 63 | Urban area | Female | 50-64 years | Widowed              | Elementary             | Housekeeper           |
| 399 | 45 | Urban area | Female | 21-49 years | Married/Cohabitation | Elementary             | Housekeeper           |
| 400 | 52 | Urban area | Men    | 50-64 years | Married/Cohabitation | Elementary             | Professional or other |
| 401 | 58 | Urban area | Men    | 50-64 years | Married/Cohabitation | Higher than elementary | Former or trader      |
| 402 | 56 | Urban area | Female | 50-64 years | Widowed              | Elementary             | Housekeeper           |
| 403 | 46 | Urban area | Female | 21-49 years | Married/Cohabitation | Elementary             | Housekeeper           |
| 404 | 64 | Urban area | Men    | 50-64 years | Married/Cohabitation | Elementary             | Professional or other |
| 405 | 64 | Urban area | Female | 50-64 years | Widowed              | Illiteracy             | Housekeeper           |
| 406 | 62 | Urban area | Female | 50-64 years | Married/Cohabitation | Higher than elementary | Former or trader      |
| 407 | 50 | Urban area | Female | 50-64 years | Married/Cohabitation | Elementary             | Housekeeper           |
| 408 | 63 | Urban area | Female | 50-64 years | Single               | Elementary             | Housekeeper           |
| 409 | 50 | Urban area | Female | 50-64 years | Married/Cohabitation | Elementary             | Housekeeper           |
| 410 | 67 | Urban area | Men    | 65-86 years | Married/Cohabitation | Elementary             | Professional or other |
| 411 | 49 | Rural area | Female | 21-49 years | Married/Cohabitation | Illiteracy             | Housekeeper           |
| 412 | 33 | Urban area | Female | 21-49 years | Married/Cohabitation | Elementary             | Housekeeper           |
| 413 | 59 | Urban area | Men    | 50-64 years | Single               | Higher than elementary | Professional or other |
| 414 | 65 | Urban area | Female | 65-86 years | Widowed              | Elementary             | Housekeeper           |
| 415 | 21 | Urban area | Men    | 21-49 years | Single               | Higher than elementary |                       |
| 416 | 47 | Urban area | Men    | 21-49 years | Married/Cohabitation | Elementary             | Professional or other |
| 417 | 59 | Urban area | Female | 50-64 years | Married/Cohabitation | Elementary             | Housekeeper           |
| 418 | 62 | Urban area | Men    | 50-64 years | Married/Cohabitation | Elementary             | Professional or other |
| 419 | 45 | Urban area | Men    | 21-49 years | Single               | Elementary             | worker                |

|     |    |            |        |             |                      |            |                       |
|-----|----|------------|--------|-------------|----------------------|------------|-----------------------|
| 420 | 52 | Urban area | Female | 50-64 years | Married/Cohabitation | Elementary | Housekeeper           |
| 421 | 68 | Urban area | Female | 65-86 years | Married/Cohabitation | Elementary | Housekeeper           |
| 422 | 51 | Urban area | Men    | 50-64 years | Married/Cohabitation | Elementary | Professional or other |
| 423 | 65 | Urban area | Female | 65-86 years | Married/Cohabitation | Elementary | Housekeeper           |
| 424 | 56 | Rural area | Female | 50-64 years | Married/Cohabitation | Illiteracy | Housekeeper           |
| 425 | 82 | Rural area | Men    | 65-86 years | Married/Cohabitation | Illiteracy | worker                |
| 426 | 50 | Rural area | Female | 50-64 years | Married/Cohabitation | Illiteracy | Housekeeper           |
| 427 | 66 | Rural area | Female | 65-86 years | Single               | Illiteracy | Housekeeper           |
| 428 |    | Rural area | Female |             | Single               | Illiteracy | Housekeeper           |
| 429 | 75 | Rural area | Female | 65-86 years | Widowed              | Illiteracy | Housekeeper           |
| 430 | 68 | Rural area | Female | 65-86 years | Widowed              | Illiteracy | worker                |
| 431 | 70 | Rural area | Female | 65-86 years | Widowed              | Illiteracy | Housekeeper           |
| 432 | 61 | Rural area | Female | 50-64 years | Separated/Divorced   | Illiteracy | Housekeeper           |
| 433 | 76 | Rural area | Female | 65-86 years | Single               | Illiteracy | worker                |
| 434 | 37 | Rural area | Female | 21-49 years | Married/Cohabitation | Elementary | Housekeeper           |
| 435 | 68 | Rural area | Female | 65-86 years | Married/Cohabitation | Illiteracy | Housekeeper           |
| 436 | 56 | Rural area | Female | 50-64 years | Married/Cohabitation | Elementary | worker                |
| 437 | 58 | Rural area | Men    | 50-64 years | Married/Cohabitation | Illiteracy | worker                |
| 438 | 66 | Rural area | Men    | 65-86 years | Widowed              | Illiteracy | Housekeeper           |
| 439 | 59 | Rural area | Female | 50-64 years | Married/Cohabitation | Elementary | Housekeeper           |
| 440 | 64 | Rural area | Men    | 50-64 years | Married/Cohabitation | Illiteracy | worker                |
| 441 | 54 | Rural area | Female | 50-64 years | Married/Cohabitation | Illiteracy | worker                |
| 442 | 47 | Rural area | Female | 21-49 years | Single               | Illiteracy | worker                |
| 443 | 53 | Rural area | Female | 50-64 years | Married/Cohabitation | Elementary | Housekeeper           |
| 444 |    | Rural area | Female |             | Married/Cohabitation | Elementary | worker                |
| 445 | 66 | Rural area | Female | 65-86 years | Single               | Elementary | Housekeeper           |
| 446 | 35 | Rural area | Female | 21-49 years | Married/Cohabitation | Elementary | Housekeeper           |
| 447 | 78 | Rural area | Female | 65-86 years | Married/Cohabitation | Elementary | Housekeeper           |
| 448 | 57 | Rural area | Female | 50-64 years | Single               | Illiteracy | Housekeeper           |
| 449 | 58 | Rural area | Female | 50-64 years | Married/Cohabitation | Elementary | Housekeeper           |

|     |    |            |        |             |                      |            |             |
|-----|----|------------|--------|-------------|----------------------|------------|-------------|
| 450 | 42 | Rural area | Female | 21-49 years | Single               | Elementary | Housekeeper |
| 451 | 30 | Rural area | Female | 21-49 years | Married/Cohabitation | Elementary | Housekeeper |
| 452 | 53 | Rural area | Female | 50-64 years | Widowed              | Elementary | Housekeeper |
| 453 | 37 | Rural area | Female | 21-49 years | Married/Cohabitation | Elementary | Housekeeper |
| 454 | 71 | Rural area | Men    | 65-86 years | Married/Cohabitation | Elementary | worker      |
| 455 | 55 | Rural area | Female | 50-64 years | Married/Cohabitation | Elementary | Housekeeper |
| 456 | 38 | Rural area | Female | 21-49 years | Married/Cohabitation | Elementary | Housekeeper |
| 457 | 37 | Rural area | Female | 21-49 years | Married/Cohabitation | Elementary | Housekeeper |
| 458 | 30 | Rural area | Men    | 21-49 years | Single               | Elementary | worker      |
| 459 | 61 | Rural area | Female | 50-64 years | Married/Cohabitation | Elementary | Housekeeper |
| 460 | 71 | Rural area | Female | 65-86 years | Married/Cohabitation | Elementary | worker      |
| 461 | 44 | Rural area | Female | 21-49 years | Married/Cohabitation | Elementary | Housekeeper |
| 462 | 75 | Rural area | Female | 65-86 years | Married/Cohabitation | Illiteracy | Housekeeper |
| 463 | 57 | Rural area | Men    | 50-64 years | Married/Cohabitation | Elementary |             |
| 464 | 45 | Rural area | Female | 21-49 years | Married/Cohabitation | Elementary | Housekeeper |
| 465 | 39 | Rural area | Female | 21-49 years | Separated/Divorced   | Elementary | Housekeeper |
| 466 | 48 | Rural area | Female | 21-49 years | Married/Cohabitation | Elementary | Housekeeper |
| 467 | 72 | Rural area | Female | 65-86 years | Widowed              | Elementary | Housekeeper |
| 468 | 56 | Rural area | Female | 50-64 years | Married/Cohabitation | Elementary | Housekeeper |
| 469 | 48 | Rural area | Female | 21-49 years | Married/Cohabitation | Elementary | Housekeeper |
| 470 | 57 | Rural area | Female | 50-64 years | Married/Cohabitation | Elementary | Housekeeper |
| 471 | 49 | Rural area | Female | 21-49 years | Married/Cohabitation | Elementary | Housekeeper |
| 472 | 49 | Rural area | Female | 21-49 years | Widowed              | Elementary | Housekeeper |
| 473 | 51 | Rural area | Female | 50-64 years | Married/Cohabitation | Elementary | Housekeeper |
| 474 | 50 | Rural area | Female | 50-64 years | Married/Cohabitation | Elementary | Housekeeper |
| 475 | 66 | Rural area | Female | 65-86 years | Single               | Elementary | worker      |
| 476 | 45 | Rural area | Female | 21-49 years | Married/Cohabitation | Elementary | Housekeeper |
| 477 | 59 | Rural area | Men    | 50-64 years | Married/Cohabitation | Elementary | worker      |
| 478 | 66 | Rural area | Female | 65-86 years | Widowed              | Elementary | Housekeeper |
| 479 | 62 | Rural area | Female | 50-64 years | Widowed              | Illiteracy | worker      |



|     |    |            |        |             |                      |            |             |
|-----|----|------------|--------|-------------|----------------------|------------|-------------|
| 480 | 77 | Rural area | Female | 65-86 years | Widowed              | Illiteracy | worker      |
| 481 | 44 | Rural area | Female | 21-49 years | Married/Cohabitation | Elementary | Housekeeper |
| 482 | 54 | Rural area | Female | 50-64 years | Widowed              | Illiteracy | Housekeeper |
| 483 | 67 | Rural area | Female | 65-86 years | Married/Cohabitation | Elementary | Housekeeper |
| 484 | 53 | Rural area | Female | 50-64 years | Widowed              | Elementary | Housekeeper |
| 485 | 63 | Rural area | Female | 50-64 years | Widowed              | Elementary | Housekeeper |
| 486 | 83 | Rural area | Female | 65-86 years | Widowed              | Illiteracy | Housekeeper |
| 487 | 63 | Rural area | Female | 50-64 years | Widowed              | Illiteracy | Housekeeper |
| 488 | 56 | Rural area | Female | 50-64 years | Separated/Divorced   | Illiteracy | Housekeeper |
| 489 | 63 | Rural area | Female | 50-64 years | Single               | Illiteracy | Housekeeper |
| 490 | 61 | Rural area | Female | 50-64 years | Widowed              | Illiteracy | Housekeeper |
| 491 | 68 | Rural area | Men    | 65-86 years | Widowed              | Illiteracy | worker      |
| 492 | 52 | Rural area | Female | 50-64 years | Married/Cohabitation | Elementary | Housekeeper |
| 493 | 48 | Rural area | Female | 21-49 years | Widowed              | Illiteracy | Housekeeper |
| 494 | 66 | Rural area | Female | 65-86 years | Widowed              | Illiteracy | worker      |
| 495 | 61 | Rural area | Female | 50-64 years | Widowed              | Illiteracy | Housekeeper |
| 496 | 64 | Rural area | Female | 50-64 years | Married/Cohabitation | Illiteracy | Housekeeper |
| 497 | 42 | Rural area | Female | 21-49 years | Married/Cohabitation | Elementary | Housekeeper |
| 498 | 51 | Rural area | Female | 50-64 years | Married/Cohabitation | Elementary | Housekeeper |
| 499 | 60 | Rural area | Female | 50-64 years | Separated/Divorced   | Elementary | Housekeeper |
| 500 | 51 | Rural area | Female | 50-64 years | Married/Cohabitation | Elementary | Housekeeper |
| 501 | 57 | Rural area | Female | 50-64 years | Married/Cohabitation | Elementary | Housekeeper |
| 502 | 68 | Rural area | Men    | 65-86 years | Married/Cohabitation | Elementary | worker      |
| 503 | 37 | Rural area | Female | 21-49 years | Married/Cohabitation | Elementary | Housekeeper |
| 504 | 43 | Rural area | Female | 21-49 years | Married/Cohabitation | Elementary | Housekeeper |
| 505 | 53 | Rural area | Female | 50-64 years | Separated/Divorced   | Elementary | Housekeeper |
| 506 | 56 | Rural area | Female | 50-64 years | Separated/Divorced   | Elementary | Housekeeper |
| 507 | 60 | Rural area | Men    | 50-64 years | Married/Cohabitation | Elementary | worker      |
| 508 | 44 | Rural area | Female | 21-49 years | Single               | Elementary | Housekeeper |
| 509 | 55 | Rural area | Female | 50-64 years | Single               | Elementary | Housekeeper |

|     |    |            |        |             |                      |                        |             |
|-----|----|------------|--------|-------------|----------------------|------------------------|-------------|
| 510 | 51 | Rural area | Female | 50-64 years | Married/Cohabitation | Elementary             | Housekeeper |
| 511 | 43 | Rural area | Female | 21-49 years | Married/Cohabitation | Elementary             | Housekeeper |
| 512 | 46 | Rural area | Female | 21-49 years | Married/Cohabitation | Elementary             | Housekeeper |
| 513 | 52 | Rural area | Female | 50-64 years | Widowed              | Elementary             | worker      |
| 514 | 49 | Rural area | Female | 21-49 years | Married/Cohabitation | Elementary             | Housekeeper |
| 515 | 55 | Rural area | Men    | 50-64 years | Married/Cohabitation | Higher than elementary | worker      |
| 516 | 59 | Rural area | Men    | 50-64 years | Married/Cohabitation | Elementary             | worker      |
| 517 | 55 | Rural area | Female | 50-64 years | Married/Cohabitation | Elementary             | Housekeeper |
| 518 | 73 | Rural area | Female | 65-86 years | Married/Cohabitation | Elementary             | worker      |
| 519 | 56 | Rural area | Female | 50-64 years | Married/Cohabitation | Elementary             | Housekeeper |
| 520 | 35 | Rural area | Female | 21-49 years | Single               | Elementary             | Housekeeper |
| 521 | 53 | Rural area | Female | 50-64 years |                      | Elementary             | Housekeeper |
| 522 | 47 | Rural area | Female | 21-49 years | Married/Cohabitation | Elementary             | Housekeeper |
| 523 | 44 | Rural area | Female | 21-49 years | Married/Cohabitation | Elementary             | Housekeeper |
| 524 | 65 | Rural area | Female | 65-86 years | Married/Cohabitation | Elementary             | Housekeeper |
| 525 | 60 | Rural area | Female | 50-64 years | Married/Cohabitation | Elementary             | Housekeeper |
| 526 | 68 | Rural area | Female | 65-86 years | Married/Cohabitation | Elementary             | Housekeeper |
| 527 | 47 | Rural area | Female | 21-49 years | Married/Cohabitation | Elementary             | Housekeeper |
| 528 | 46 | Rural area | Female | 21-49 years | Married/Cohabitation | Elementary             | Housekeeper |
| 529 | 55 | Rural area | Female | 50-64 years | Married/Cohabitation | Elementary             | Housekeeper |
| 530 | 42 | Rural area | Female | 21-49 years | Married/Cohabitation | Elementary             | Housekeeper |
| 531 | 61 | Rural area | Female | 50-64 years | Married/Cohabitation | Elementary             | Housekeeper |
| 532 | 47 | Rural area | Female | 21-49 years | Married/Cohabitation | Elementary             | Housekeeper |
| 533 | 53 | Rural area | Men    | 50-64 years | Separated/Divorced   | Elementary             | worker      |
| 534 | 62 | Rural area | Female | 50-64 years | Widowed              | Elementary             | Housekeeper |
| 535 | 37 | Rural area | Female | 21-49 years | Married/Cohabitation | Elementary             | Housekeeper |
| 536 | 55 | Rural area | Female | 50-64 years | Single               | Elementary             | Housekeeper |
| 537 | 68 | Rural area | Female | 65-86 years | Single               | Elementary             | Housekeeper |
| 538 | 53 | Rural area | Female | 50-64 years | Married/Cohabitation | Elementary             | Housekeeper |
| 539 | 56 | Rural area | Female | 50-64 years | Married/Cohabitation | Elementary             | Housekeeper |

|     |    |            |        |             |                      |            |             |
|-----|----|------------|--------|-------------|----------------------|------------|-------------|
| 540 | 50 | Rural area | Female | 50-64 years | Married/Cohabitation | Elementary | Housekeeper |
| 541 |    | Rural area | Female |             | Widowed              | Elementary | worker      |
| 542 | 42 | Rural area | Female | 21-49 years | Married/Cohabitation | Elementary | Housekeeper |
| 543 | 51 | Rural area | Female | 50-64 years | Married/Cohabitation | Elementary | Housekeeper |
| 544 | 58 | Rural area | Female | 50-64 years | Married/Cohabitation | Illiteracy | Housekeeper |
| 545 | 73 | Rural area | Female | 65-86 years | Widowed              | Illiteracy | Housekeeper |
| 546 | 68 | Rural area | Female | 65-86 years | Married/Cohabitation | Elementary | Housekeeper |
| 547 | 48 | Rural area | Female | 21-49 years | Widowed              | Elementary | Housekeeper |
| 548 | 55 | Rural area | Female | 50-64 years | Married/Cohabitation | Elementary | worker      |
| 549 | 75 | Rural area | Female | 65-86 years | Married/Cohabitation | Elementary | Housekeeper |
| 550 | 51 | Rural area | Female | 50-64 years | Married/Cohabitation | Elementary | Housekeeper |
| 551 | 60 | Rural area | Female | 50-64 years | Married/Cohabitation | Elementary | Housekeeper |
| 552 | 56 | Rural area | Female | 50-64 years | Married/Cohabitation | Elementary | Housekeeper |
| 553 | 57 | Rural area | Female | 50-64 years | Married/Cohabitation | Elementary | Housekeeper |

| progrm | tdiab5         | p31 | comp_Neuro | comp_Amp | comp_Nefro | comp_Vista | comadbt | p89          | Apoy_eco | Apoy_especi |
|--------|----------------|-----|------------|----------|------------|------------|---------|--------------|----------|-------------|
| 1      | 3 years or few | 0   | 0          | 0        | 0          | 0          | 0       | no support   |          |             |
|        | 4-12 years     | 0   | 0          | 0        | 0          | 0          | 0       | no support   |          |             |
| 1      | 3 years or few | 0   | 0          | 0        | 0          | 0          | 0       | no support   |          |             |
| 1      | 4-12 years     | 1   |            | 1        |            |            |         | some support | 1        | 0           |
| 1      |                | 0   |            |          |            |            |         | no support   |          |             |
| 1      | 3 years or few | 0   |            |          |            |            |         | some support | 1        | 0           |
| 1      | more than 12   | 1   |            |          |            | 1          |         | some support | 1        | 0           |
| 1      | 3 years or few | 0   | 0          | 0        | 0          | 0          | 0       | some support | 1        | 0           |
| 1      | 4-12 years     | 0   | 0          | 0        | 0          | 0          | 0       | some support | 1        | 0           |
| 1      | 4-12 years     | 0   | 0          | 0        | 0          | 0          | 0       | some support | 1        | 0           |
| 1      | 3 years or few | 0   | 0          | 0        | 0          | 0          | 0       | some support | 1        | 0           |
| 1      | 3 years or few | 0   | 0          | 0        | 0          | 0          | 0       | some support | 0        | 0           |
| 1      | 3 years or few | 0   | 0          | 0        | 0          | 0          | 0       | some support | 0        | 0           |
| 1      | 4-12 years     | 0   | 0          | 0        | 0          | 0          | 0       | some support | 1        | 0           |
| 1      | 3 years or few | 0   | 0          | 0        | 0          | 0          | 0       | some support | 1        | 0           |
| 1      | 3 years or few | 0   | 0          | 0        | 0          | 0          | 0       | some support | 1        | 0           |
| 1      | 4-12 years     | 0   | 0          | 0        | 0          | 0          | 0       | some support | 0        | 0           |
|        | 3 years or few | 0   | 0          | 0        | 0          | 0          | 0       | some support | 1        | 0           |
| 1      | 3 years or few | 1   |            |          |            | 1          |         | some support | 1        | 1           |
| 1      | 3 years or few | 0   | 0          | 0        | 0          | 0          | 0       | some support | 1        | 0           |
| 2      | 3 years or few | 1   |            |          |            | 1          |         | no support   |          |             |
| 1      | 3 years or few | 0   | 0          | 0        | 0          | 0          | 0       | some support | 0        | 0           |
| 1      |                | 1   |            |          |            | 1          |         | some support | 0        | 0           |
| 1      | 3 years or few | 0   | 0          | 0        | 0          | 0          | 0       | no support   |          |             |
| 1      | 3 years or few | 0   | 0          | 0        | 0          | 0          | 0       | no support   |          |             |
| 1      | 3 years or few | 0   | 0          | 0        | 0          | 0          | 0       | some support | 1        | 0           |
| 1      | more than 12   | 1   |            |          |            | 1          |         | some support | 1        | 0           |
| 1      | more than 12   | 1   |            |          |            | 1          | 1       | some support | 1        | 1           |
| 1      | 4-12 years     | 0   | 0          | 0        | 0          | 0          | 0       | no support   |          |             |

|   |                |   |   |   |   |   |   |              |   |   |
|---|----------------|---|---|---|---|---|---|--------------|---|---|
| 1 | more than 12   | 0 |   |   |   |   |   | some support | 0 | 0 |
| 1 |                | 0 |   |   |   |   |   | no support   |   |   |
| 1 | 3 years or few | 0 |   |   |   |   |   | no support   |   |   |
| 2 | 4-12 years     | 1 |   |   |   | 1 | 1 | some support | 0 | 0 |
| 1 | more than 12   | 0 | 0 | 0 | 0 | 0 | 0 | some support | 1 | 0 |
| 1 | 3 years or few | 0 | 0 | 0 | 0 | 0 | 0 | no support   |   |   |
| 2 | more than 12   | 1 |   |   |   | 1 |   | no support   |   |   |
| 1 | more than 12   | 1 |   |   |   | 1 |   | some support | 0 | 0 |
| 2 | 3 years or few | 0 | 0 | 0 | 0 | 0 | 0 | some support | 0 | 0 |
|   | 3 years or few | 0 | 0 | 0 | 0 | 0 | 0 | some support | 1 | 0 |
| 1 | 3 years or few | 0 | 0 | 0 | 0 | 0 | 0 | some support | 1 | 0 |
| 1 |                | 0 |   |   |   |   |   | some support | 1 | 0 |
| 1 | 4-12 years     | 0 | 0 | 0 | 0 | 0 | 0 | some support | 1 | 0 |
| 2 | 4-12 years     | 0 | 0 | 0 | 0 | 0 | 0 | some support | 0 | 0 |
| 1 | 4-12 years     | 1 |   |   |   | 1 |   | no support   |   |   |
| 2 | 3 years or few | 0 | 0 | 0 | 0 | 0 | 0 | some support | 1 | 0 |
| 1 | more than 12   | 1 |   |   |   | 1 |   | some support | 1 | 1 |
| 2 | more than 12   | 1 |   |   |   | 1 |   | some support | 1 | 0 |
| 2 | 3 years or few | 0 | 0 | 0 | 0 | 0 | 0 | some support | 1 | 0 |
|   | 4-12 years     | 0 | 0 | 0 | 0 | 0 | 0 | some support | 1 | 0 |
| 1 | 4-12 years     | 0 | 0 | 0 | 0 | 0 | 0 | some support | 0 | 0 |
| 1 | 4-12 years     | 0 | 0 | 0 | 0 | 0 | 0 | some support | 0 | 0 |
| 2 | 3 years or few | 0 | 0 | 0 | 0 | 0 | 0 | some support | 1 | 0 |
| 1 | 3 years or few | 0 | 0 | 0 | 0 | 0 | 0 | some support | 1 | 0 |
| 1 | 3 years or few | 1 |   |   |   | 1 |   | some support | 0 | 0 |
| 2 | 4-12 years     | 1 |   |   |   | 1 |   | some support | 0 | 0 |
| 1 |                | 0 | 0 | 0 | 0 | 0 | 0 | some support | 1 | 0 |
| 1 | 3 years or few | 1 |   |   |   | 1 |   | some support | 1 | 1 |
| 1 | 4-12 years     | 0 | 0 | 0 | 0 | 0 | 0 | some support | 1 | 0 |
| 1 | 4-12 years     | 0 |   |   |   |   |   | some support | 1 | 1 |

|   |                |   |   |   |   |   |   |              |   |   |
|---|----------------|---|---|---|---|---|---|--------------|---|---|
| 1 | 3 years or few | 1 |   |   |   | 1 |   | some support | 1 | 0 |
| 1 | 4-12 years     | 0 | 0 | 0 | 0 | 0 | 0 | some support | 0 | 0 |
| 1 | 3 years or few | 0 | 0 | 0 | 0 | 0 | 0 | some support | 0 | 0 |
| 1 | 3 years or few | 0 | 0 | 0 | 0 | 0 | 0 | some support | 1 | 1 |
| 1 | 3 years or few | 0 | 0 | 0 | 0 | 0 | 0 | some support | 1 | 1 |
| 2 | more than 12   | 1 |   |   |   | 1 |   | some support | 1 | 0 |
| 1 | 3 years or few | 0 | 0 | 0 | 0 | 0 | 0 | no support   |   |   |
| 1 | 4-12 years     | 0 | 0 | 0 | 0 | 0 | 0 | no support   |   |   |
| 1 | 4-12 years     | 0 | 0 | 0 | 0 | 0 | 0 | no support   |   |   |
| 1 | 3 years or few | 0 | 0 | 0 | 0 | 0 | 0 | no support   |   |   |
|   |                | 0 |   |   |   |   |   | no support   |   |   |
| 1 | 3 years or few | 0 | 0 | 0 | 0 | 0 | 0 | no support   |   |   |
|   | more than 12   | 1 |   |   |   | 1 |   |              |   |   |
|   |                | 0 |   |   |   |   |   |              |   |   |
| 2 |                | 0 |   |   |   |   |   | some support | 0 | 0 |
| 1 | 4-12 years     | 1 | 1 |   |   | 1 |   | no support   |   |   |
| 1 |                | 0 |   |   |   |   |   | some support | 0 | 0 |
| 2 | more than 12   | 0 |   |   |   |   |   | some support | 1 | 0 |
| 1 | 3 years or few | 0 | 0 | 0 | 0 | 0 | 0 | some support | 1 | 0 |
| 2 | 3 years or few | 0 | 0 | 0 | 0 | 0 | 0 | some support | 1 | 1 |
| 1 | more than 12   | 0 |   |   |   |   |   |              |   |   |
| 1 | 3 years or few | 1 |   |   |   | 1 |   | no support   |   |   |
| 2 | 3 years or few | 0 | 0 | 0 | 0 | 0 | 0 | no support   |   |   |
| 1 | 3 years or few | 0 |   |   |   |   |   | some support | 0 | 0 |
| 1 | 3 years or few | 0 | 0 | 0 | 0 | 0 | 0 | some support | 1 | 0 |
| 1 | 4-12 years     | 0 | 0 | 0 | 0 | 0 | 0 | some support | 1 | 0 |
| 1 | 4-12 years     | 0 | 0 | 0 | 0 | 0 | 0 | some support | 0 | 0 |
| 1 | 3 years or few | 0 | 0 | 0 | 0 | 0 | 0 | some support | 1 | 1 |
| 1 | 3 years or few | 0 | 0 | 0 | 0 | 0 | 0 | some support | 0 | 0 |
| 1 | 3 years or few | 0 | 0 | 0 | 0 | 0 | 0 | some support | 1 | 0 |

|   |                |   |   |   |   |   |   |              |   |   |
|---|----------------|---|---|---|---|---|---|--------------|---|---|
| 1 |                | 0 | 0 | 0 | 0 | 0 | 0 | some support | 1 | 1 |
| 1 | more than 12   | 0 | 0 | 0 | 0 | 0 | 0 | some support | 1 | 1 |
| 1 | 3 years or few | 0 | 0 | 0 | 0 | 0 | 0 | some support | 1 | 1 |
| 1 | 4-12 years     | 0 | 0 | 0 | 0 | 0 | 0 | some support | 1 | 1 |
| 1 | 4-12 years     | 0 | 0 | 0 | 0 | 0 | 0 | some support | 1 | 0 |
| 1 | 4-12 years     | 0 | 0 | 0 | 0 | 0 | 0 | no support   |   |   |
| 1 | 4-12 years     | 0 | 0 | 0 | 0 | 0 | 0 | no support   |   |   |
| 1 | 4-12 years     | 1 |   |   |   |   | 1 | some support | 0 | 0 |
| 1 | 3 years or few | 1 |   |   |   |   | 1 | some support | 1 | 1 |
| 1 | 4-12 years     | 1 |   |   |   |   | 1 | no support   |   |   |
| 1 | more than 12   | 0 | 0 | 0 | 0 | 0 | 0 | some support | 0 | 0 |
| 1 | more than 12   | 1 |   |   |   |   | 1 | some support | 1 | 0 |
| 1 | more than 12   | 1 |   | 1 |   |   |   | some support | 1 | 0 |
| 1 | 4-12 years     | 1 |   |   |   |   | 1 | some support | 1 | 0 |
| 1 | 4-12 years     | 0 |   |   |   |   |   | no support   |   |   |
| 1 | 3 years or few | 1 |   |   |   |   | 1 | some support | 1 | 0 |
| 1 | 3 years or few | 0 | 0 | 0 | 0 | 0 | 0 | some support | 0 | 0 |
| 2 | 3 years or few | 0 | 0 | 0 | 0 | 0 | 0 | no support   |   |   |
| 1 | more than 12   | 1 |   |   |   |   | 1 | some support | 0 | 0 |
| 2 | 4-12 years     | 1 |   |   |   |   | 1 | some support | 0 | 0 |
| 1 | 4-12 years     | 1 |   |   |   |   | 1 | some support | 0 | 0 |
| 1 | 4-12 years     | 1 |   |   |   |   | 1 | no support   |   |   |
| 1 | 4-12 years     | 0 | 0 | 0 | 0 | 0 | 0 | some support | 0 | 0 |
| 1 | 3 years or few | 0 | 0 | 0 | 0 | 0 | 0 | some support | 1 | 0 |
| 1 | 4-12 years     | 0 | 0 | 0 | 0 | 0 | 0 | some support | 1 | 0 |
| 1 | 4-12 years     | 1 |   |   |   |   | 1 | some support | 1 | 0 |
| 1 | 4-12 years     | 0 |   |   |   |   |   | some support | 0 | 0 |
| 1 | 4-12 years     | 1 |   |   |   |   | 1 | some support | 0 | 0 |
| 1 | 3 years or few | 0 |   |   |   |   |   | some support | 0 | 0 |
| 1 | 4-12 years     | 1 | 1 |   |   |   |   | some support | 1 | 1 |

|   |                |   |   |   |   |   |   |                |   |   |
|---|----------------|---|---|---|---|---|---|----------------|---|---|
| 1 | 3 years or few | 1 |   | 1 |   |   |   | some support   | 0 | 0 |
| 1 | 4-12 years     | 0 | 0 | 0 | 0 | 0 | 0 | no support     |   |   |
| 1 | more than 12   | 1 |   |   |   | 1 |   | some support   | 1 | 0 |
| 1 | 4-12 years     | 0 | 0 | 0 | 0 | 0 | 0 | no support     |   |   |
| 1 | 4-12 years     | 0 | 0 | 0 | 0 | 0 | 0 | no support     |   |   |
| 1 | more than 12   | 0 | 0 | 0 | 0 | 0 | 0 | some support   | 1 | 1 |
| 1 | 4-12 years     | 0 | 0 | 0 | 0 | 0 | 0 | no support     |   |   |
| 1 | 3 years or few | 0 |   |   |   |   |   | no support     |   |   |
| 1 | 4-12 years     | 1 |   |   |   |   | 1 | no support     |   |   |
| 1 | 4-12 years     | 0 | 0 | 0 | 0 | 0 | 0 | some support   | 0 | 0 |
| 1 | 3 years or few | 0 | 0 | 0 | 0 | 0 | 0 | some support   | 1 | 0 |
| 1 | more than 12   | 0 | 0 | 0 | 0 | 0 | 0 | some support   | 0 | 0 |
| 1 | 4-12 years     | 0 | 0 | 0 | 0 | 0 | 0 | some support   | 1 | 0 |
| 1 | 3 years or few | 1 |   |   |   |   | 1 | some support   | 0 | 0 |
| 1 | 4-12 years     | 0 |   |   |   |   |   | no support     |   |   |
| 1 | 3 years or few | 0 | 0 | 0 | 0 | 0 | 0 | some support   | 0 | 0 |
| 2 | 4-12 years     | 0 | 0 | 0 | 0 | 0 | 0 | some support   | 0 | 0 |
| 1 | 3 years or few | 0 | 0 | 0 | 0 | 0 | 0 | some support   | 0 | 0 |
| 2 | 3 years or few | 1 |   |   |   |   | 1 | some support   | 1 | 0 |
| 2 | 4-12 years     | 1 |   |   |   |   |   | 1 some support | 1 | 0 |
| 1 | more than 12   | 0 | 0 | 0 | 0 | 0 | 0 | some support   | 1 | 0 |
| 2 | 4-12 years     | 0 | 0 | 0 | 0 | 0 | 0 | some support   | 1 | 0 |
| 1 | 4-12 years     | 0 | 0 | 0 | 0 | 0 | 0 | some support   | 1 | 0 |
| 1 | 3 years or few | 1 |   |   |   |   | 1 | some support   | 1 | 0 |
| 1 | 4-12 years     | 1 | 1 |   |   |   |   | no support     |   |   |
| 1 | 4-12 years     | 0 | 0 | 0 | 0 | 0 | 0 | some support   | 1 | 0 |
|   | 4-12 years     | 0 | 0 | 0 | 0 | 0 | 0 | some support   | 0 | 0 |
| 1 | 4-12 years     | 0 | 0 | 0 | 0 | 0 | 0 | no support     |   |   |
| 2 | 3 years or few | 0 | 0 | 0 | 0 | 0 | 0 | some support   | 1 | 0 |
| 1 | 4-12 years     | 0 | 0 | 0 | 0 | 0 | 0 | no support     |   |   |



|   |                |   |   |   |   |   |   |              |   |   |
|---|----------------|---|---|---|---|---|---|--------------|---|---|
| 2 | 4-12 years     | 0 | 0 | 0 | 0 | 0 | 0 | no support   |   |   |
| 1 | 4-12 years     | 1 |   |   |   | 1 |   | some support | 0 | 0 |
| 1 | 4-12 years     | 1 |   |   |   | 1 |   | some support | 1 | 0 |
| 1 | 3 years or few | 1 |   |   |   | 1 |   | some support | 1 | 0 |
| 1 | 4-12 years     | 0 | 0 | 0 | 0 | 0 | 0 | no support   |   |   |
| 1 | 3 years or few | 0 | 0 | 0 | 0 | 0 | 0 | some support | 1 | 0 |
| 2 | 4-12 years     | 0 | 0 | 0 | 0 | 0 | 0 | some support | 1 | 0 |
| 1 | 3 years or few | 0 | 0 | 0 | 0 | 0 | 0 | no support   |   |   |
| 2 | 4-12 years     | 0 | 0 | 0 | 0 | 0 | 0 | no support   |   |   |
| 2 | 4-12 years     | 1 |   |   | 1 |   |   | some support | 0 | 0 |
| 1 | more than 12   | 0 | 0 | 0 | 0 | 0 | 0 | some support | 1 | 0 |
| 1 | more than 12   | 1 |   |   |   | 1 |   | some support | 0 | 0 |
| 1 | more than 12   | 0 | 0 | 0 | 0 | 0 | 0 | some support | 1 | 0 |
| 1 | more than 12   | 0 |   |   |   |   |   | some support | 1 | 0 |
| 2 | 4-12 years     | 1 |   |   |   | 1 |   | no support   |   |   |
| 1 | more than 12   | 1 | 1 |   |   |   |   | some support | 1 | 0 |
| 1 | 3 years or few | 0 | 0 | 0 | 0 | 0 | 0 | some support | 0 | 0 |
| 2 | more than 12   | 0 | 0 | 0 | 0 | 0 | 0 | some support | 0 | 0 |
| 1 | 4-12 years     | 1 |   |   | 1 |   |   | some support | 1 | 0 |
| 1 | 3 years or few | 1 | 1 |   |   | 1 |   | some support | 0 | 0 |
| 2 | 4-12 years     | 0 | 0 | 0 | 0 | 0 | 0 | some support | 0 | 0 |
| 2 | 4-12 years     | 1 |   |   |   |   | 1 | no support   |   |   |
| 2 | more than 12   | 1 |   |   | 1 | 1 |   | no support   |   |   |
| 2 | more than 12   | 1 |   |   | 1 |   |   | some support | 0 | 0 |
| 2 | 4-12 years     | 1 |   |   |   | 1 |   | some support | 0 | 0 |
| 2 | 4-12 years     | 1 |   |   |   | 1 |   | no support   |   |   |
| 2 | more than 12   | 0 | 0 | 0 | 0 | 0 | 0 | some support | 1 | 0 |
| 2 | 4-12 years     | 0 | 0 | 0 | 0 | 0 | 0 | some support | 1 | 0 |
| 1 | more than 12   | 1 |   |   | 1 | 1 |   | no support   |   |   |
| 1 | 3 years or few | 0 | 0 | 0 | 0 | 0 | 0 | no support   |   |   |

|   |                |   |   |   |   |   |   |              |   |   |
|---|----------------|---|---|---|---|---|---|--------------|---|---|
| 2 | 4-12 years     | 0 | 0 | 0 | 0 | 0 | 0 | no support   |   |   |
| 2 | 3 years or few | 0 | 0 | 0 | 0 | 0 | 0 | some support | 1 | 0 |
| 2 | 3 years or few | 1 | 1 |   |   |   |   | some support | 1 | 0 |
| 2 | 4-12 years     | 0 | 0 | 0 | 0 | 0 | 0 | some support | 0 | 0 |
| 2 | more than 12   | 1 |   |   |   |   | 1 | some support | 0 | 0 |
| 2 | 4-12 years     | 1 |   | 1 | 1 |   |   | some support | 0 | 0 |
| 2 | more than 12   | 0 | 0 | 0 | 0 | 0 | 0 | no support   |   |   |
| 2 | 4-12 years     | 0 | 0 | 0 | 0 | 0 | 0 | no support   |   |   |
| 2 | more than 12   | 1 |   |   |   |   | 1 | some support | 1 | 0 |
| 2 | more than 12   | 1 |   |   |   |   | 1 | some support | 1 | 0 |
| 2 | 4-12 years     | 0 | 0 | 0 | 0 | 0 | 0 | some support | 0 | 0 |
| 2 | 4-12 years     | 1 |   |   |   |   | 1 | no support   |   |   |
| 2 | 4-12 years     | 0 |   |   |   |   |   | no support   |   |   |
| 2 | 4-12 years     | 0 | 0 | 0 | 0 | 0 | 0 | no support   |   |   |
| 2 | more than 12   | 0 | 0 | 0 | 0 | 0 | 0 | no support   |   |   |
| 2 | 3 years or few | 0 | 0 | 0 | 0 | 0 | 0 | some support | 1 | 0 |
| 1 | 3 years or few | 0 | 0 | 0 | 0 | 0 | 0 | some support | 0 | 0 |
| 1 | 4-12 years     | 1 |   |   |   |   | 1 | no support   |   |   |
| 2 | 4-12 years     | 0 | 0 | 0 | 0 | 0 | 0 | some support | 0 | 0 |
| 2 | 3 years or few | 0 | 0 | 0 | 0 | 0 | 0 | some support | 0 | 0 |
| 2 | more than 12   | 1 |   |   |   |   | 1 | no support   |   |   |
| 2 | more than 12   | 1 |   |   |   |   | 1 | no support   |   |   |
| 2 | more than 12   | 0 | 0 | 0 | 0 | 0 | 0 | no support   |   |   |
| 1 | 4-12 years     | 0 |   |   |   |   |   | some support | 1 | 0 |
| 2 | more than 12   | 0 | 0 | 0 | 0 | 0 | 0 | some support | 0 | 0 |
| 1 | more than 12   | 0 |   |   |   |   |   | some support | 0 | 0 |
| 2 | 3 years or few | 0 | 0 | 0 | 0 | 0 | 0 | some support | 1 | 0 |
| 2 | more than 12   | 1 |   |   |   |   | 1 | some support | 1 | 0 |
| 1 | more than 12   | 1 |   |   |   |   |   | some support | 1 | 0 |
| 1 | more than 12   | 0 |   |   |   |   |   | some support | 1 | 0 |

|   |                |   |   |   |   |   |   |              |   |   |
|---|----------------|---|---|---|---|---|---|--------------|---|---|
| 1 | more than 12   | 0 |   |   |   |   |   | no support   |   |   |
| 2 | more than 12   | 0 |   |   |   |   |   | no support   |   |   |
| 2 | more than 12   | 1 |   |   |   | 1 |   | some support | 0 | 0 |
| 2 | 3 years or few | 1 |   |   |   | 1 |   | some support | 0 | 0 |
| 2 | 3 years or few | 0 | 0 | 0 | 0 | 0 | 0 | some support | 0 | 0 |
| 2 | 4-12 years     | 0 |   |   |   |   |   | some support | 0 | 0 |
| 2 | 4-12 years     | 0 | 0 | 0 | 0 | 0 | 0 | some support | 0 | 0 |
| 2 | 3 years or few | 0 | 0 | 0 | 0 | 0 | 0 | some support | 1 | 1 |
| 2 | 4-12 years     | 0 | 0 | 0 | 0 | 0 | 0 | some support | 0 | 0 |
| 2 | 4-12 years     | 0 | 0 | 0 | 0 | 0 | 0 | some support | 0 | 0 |
| 2 | 4-12 years     | 0 | 0 | 0 | 0 | 0 | 0 | some support | 0 | 0 |
| 1 | 4-12 years     | 0 | 0 | 0 | 0 | 0 | 0 | some support | 0 | 0 |
| 2 | more than 12   | 0 |   |   |   |   |   | some support | 0 | 0 |
| 1 | 4-12 years     | 0 | 0 | 0 | 0 | 0 | 0 | some support | 1 | 1 |
| 1 | more than 12   | 0 |   |   |   |   |   | some support | 0 | 0 |
| 2 | more than 12   | 1 |   |   |   | 1 |   | some support | 0 | 0 |
| 2 | more than 12   | 1 |   |   |   |   | 1 | some support | 0 | 0 |
| 2 | 4-12 years     | 1 |   |   |   | 1 |   | some support | 0 | 0 |
| 2 | more than 12   | 0 |   |   |   |   |   | some support | 1 | 0 |
| 2 | 4-12 years     | 0 |   |   |   |   |   | some support | 1 | 0 |
| 2 | 4-12 years     | 1 |   |   |   | 1 |   | some support | 0 | 0 |
| 2 | 4-12 years     | 0 |   |   |   |   |   | some support | 0 | 0 |
|   | more than 12   | 0 |   |   |   |   |   | some support | 0 | 0 |
| 2 | 4-12 years     | 1 |   |   |   | 1 |   | some support | 0 | 0 |
| 2 | 4-12 years     | 0 | 0 | 0 | 0 | 0 | 0 | no support   |   |   |
| 2 | 4-12 years     | 0 |   |   |   |   |   | some support | 1 | 0 |
| 1 | more than 12   | 0 |   |   |   |   |   | some support | 0 | 0 |
| 2 | more than 12   | 1 |   |   |   | 1 |   | some support | 0 | 0 |
| 2 | 4-12 years     | 0 | 0 | 0 | 0 | 0 | 0 | no support   |   |   |
|   | 4-12 years     | 0 | 0 | 0 | 0 | 0 | 0 | some support | 0 | 0 |

|   |                |   |   |   |   |   |   |              |   |   |
|---|----------------|---|---|---|---|---|---|--------------|---|---|
| 2 | 4-12 years     | 1 |   |   |   | 1 |   | some support | 1 | 1 |
| 2 | 4-12 years     | 0 | 0 | 0 | 0 | 0 | 0 | no support   |   |   |
| 2 | 3 years or few | 0 | 0 | 0 | 0 | 0 | 0 | some support | 1 | 0 |
| 2 | 4-12 years     | 1 |   |   |   | 1 |   | some support | 1 | 0 |
| 2 | 4-12 years     | 1 |   |   |   | 1 |   | some support | 0 | 0 |
| 2 | 3 years or few | 0 | 0 | 0 | 0 | 0 | 0 | some support | 0 | 0 |
| 2 | 4-12 years     | 1 |   |   |   | 1 |   | some support | 0 | 0 |
| 2 | 4-12 years     | 1 |   |   |   | 1 |   | some support | 0 | 0 |
| 2 | more than 12   | 0 | 0 | 0 | 0 | 0 | 0 | some support | 0 | 0 |
| 2 | more than 12   | 0 | 0 | 0 | 0 | 0 | 0 | some support | 1 | 0 |
| 2 | more than 12   | 1 |   |   |   | 1 | 1 | some support | 1 | 0 |
| 2 | more than 12   | 1 |   |   |   | 1 |   | some support | 0 | 0 |
| 2 | more than 12   | 0 | 0 | 0 | 0 | 0 | 0 | some support | 1 | 0 |
| 1 | 3 years or few | 0 |   |   |   |   |   | some support | 0 | 0 |
| 2 | more than 12   | 1 |   |   |   | 1 |   | some support | 1 | 0 |
| 1 | more than 12   | 0 | 0 | 0 | 0 | 0 | 0 | some support | 0 | 0 |
| 2 | 4-12 years     | 0 | 0 | 0 | 0 | 0 | 0 | some support | 0 | 0 |
| 2 | more than 12   | 0 | 0 | 0 | 0 | 0 | 0 | no support   |   |   |
| 1 | 3 years or few | 0 | 0 | 0 | 0 | 0 | 0 | some support | 1 | 1 |
| 1 | 3 years or few | 0 | 0 | 0 | 0 | 0 | 0 | some support | 0 | 0 |
| 1 | 4-12 years     | 0 | 0 | 0 | 0 | 0 | 0 | some support | 1 | 0 |
| 2 | 4-12 years     | 0 | 0 | 0 | 0 | 0 | 0 | some support | 0 | 0 |
| 2 | more than 12   | 1 |   |   |   | 1 |   | no support   |   |   |
| 1 | 4-12 years     | 0 | 0 | 0 | 0 | 0 | 0 | some support | 1 | 0 |
| 1 | 4-12 years     | 0 |   |   |   |   |   | some support | 0 | 0 |
| 2 | more than 12   | 0 |   |   |   |   |   | some support | 1 | 0 |
|   | 3 years or few | 1 | 1 |   |   |   |   | some support | 0 | 0 |
| 1 | more than 12   | 0 |   |   |   |   |   | some support | 0 | 0 |
| 1 | 4-12 years     | 1 |   |   |   | 1 |   | some support | 1 | 1 |
| 1 | 4-12 years     | 0 | 0 | 0 | 0 | 0 | 0 | some support | 1 | 0 |

|   |                |   |   |   |   |   |   |              |   |   |
|---|----------------|---|---|---|---|---|---|--------------|---|---|
| 2 | 4-12 years     | 0 |   |   |   |   |   | some support | 1 | 0 |
| 2 | 4-12 years     | 0 |   |   |   |   |   | some support | 1 | 1 |
| 2 | 4-12 years     | 0 | 0 | 0 | 0 | 0 | 0 | some support | 0 | 0 |
| 2 | 4-12 years     | 0 | 0 | 0 | 0 | 0 | 0 | some support | 1 | 0 |
| 1 | 3 years or few | 0 | 0 | 0 | 0 | 0 | 0 | some support | 0 | 0 |
| 2 | 4-12 years     | 1 |   |   |   |   | 1 | some support | 1 | 0 |
| 2 | 4-12 years     | 0 | 0 | 0 | 0 | 0 | 0 | some support | 0 | 0 |
| 2 | 4-12 years     | 0 | 0 | 0 | 0 | 0 | 0 | some support | 0 | 0 |
| 1 | 3 years or few | 0 | 0 | 0 | 0 | 0 | 0 | some support | 1 | 0 |
| 2 | 4-12 years     | 0 |   |   |   |   |   | no support   |   |   |
| 2 | 4-12 years     | 0 | 0 | 0 | 0 | 0 | 0 | some support | 1 | 0 |
| 1 | more than 12   | 0 | 0 | 0 | 0 | 0 | 0 | some support | 0 | 0 |
| 1 | 4-12 years     | 0 | 0 | 0 | 0 | 0 | 0 | some support | 0 | 0 |
| 2 | 4-12 years     | 0 | 0 | 0 | 0 | 0 | 0 | some support | 1 | 0 |
| 1 | 3 years or few | 0 | 0 | 0 | 0 | 0 | 0 | some support | 0 | 0 |
| 2 | 4-12 years     | 1 |   |   |   |   | 1 | some support | 0 | 0 |
| 1 | more than 12   | 0 | 0 | 0 | 0 | 0 | 0 | some support | 0 | 0 |
| 2 | 4-12 years     | 0 | 0 | 0 | 0 | 0 | 0 | some support | 0 | 0 |
| 2 | more than 12   | 0 | 0 | 0 | 0 | 0 | 0 | some support | 1 | 0 |
| 1 | 4-12 years     | 0 | 0 | 0 | 0 | 0 | 0 | some support | 1 | 0 |
| 1 | 4-12 years     | 1 |   |   |   |   | 1 | some support | 1 | 0 |
| 2 | 4-12 years     | 0 | 0 | 0 | 0 | 0 | 0 | some support | 0 | 0 |
| 2 | 4-12 years     | 0 | 0 | 0 | 0 | 0 | 0 | some support | 0 | 0 |
| 1 | more than 12   | 1 | 1 |   |   |   | 1 | some support | 0 | 0 |
| 1 | 4-12 years     | 0 | 0 | 0 | 0 | 0 | 0 | some support | 1 | 0 |
| 2 | 3 years or few | 0 |   |   |   |   |   | some support | 1 | 0 |
| 2 | 4-12 years     | 1 | 1 |   |   |   | 1 | some support | 1 | 1 |
| 2 | more than 12   | 1 |   |   |   |   | 1 | some support | 1 | 0 |
| 2 | 3 years or few | 0 | 0 | 0 | 0 | 0 | 0 | some support | 0 | 0 |
| 1 | 3 years or few | 0 | 0 | 0 | 0 | 0 | 0 | some support | 1 | 0 |

|   |                |   |   |   |   |   |   |              |   |   |
|---|----------------|---|---|---|---|---|---|--------------|---|---|
| 2 | more than 12   | 0 | 0 | 0 | 0 | 0 | 0 | some support | 1 | 0 |
| 2 | 4-12 years     | 1 |   |   |   | 1 |   | some support | 1 | 1 |
| 2 | 3 years or few | 0 |   |   |   |   |   | some support | 0 | 0 |
| 2 | more than 12   | 1 |   |   |   | 1 |   | some support | 0 | 0 |
| 2 | 4-12 years     | 0 | 0 | 0 | 0 | 0 | 0 | some support | 0 | 0 |
| 2 | 4-12 years     | 0 | 0 | 0 | 0 | 0 | 0 | some support | 0 | 0 |
| 2 | 3 years or few | 0 |   |   |   |   |   | some support | 1 | 0 |
| 2 | more than 12   | 0 | 0 | 0 | 0 | 0 | 0 | some support | 0 | 0 |
| 1 | 4-12 years     | 1 |   |   |   | 1 |   | some support | 0 | 0 |
| 2 | 4-12 years     | 1 | 1 |   |   | 1 |   | some support | 1 | 0 |
| 2 | 4-12 years     | 0 | 0 | 0 | 0 | 0 | 0 | some support | 1 | 0 |
| 2 | 4-12 years     | 0 | 0 | 0 | 0 | 0 | 0 | some support | 0 | 0 |
| 2 | more than 12   | 1 |   | 1 |   |   |   | some support | 1 | 0 |
| 1 | 4-12 years     | 0 | 0 | 0 | 0 | 0 | 0 | some support | 1 | 1 |
| 1 | 4-12 years     | 0 | 0 | 0 | 0 | 0 | 0 | some support | 1 | 0 |
| 2 | 3 years or few | 0 | 0 | 0 | 0 | 0 | 0 | some support | 1 | 0 |
| 2 | 4-12 years     | 0 |   |   |   |   |   | some support | 1 | 1 |
| 2 | more than 12   | 1 |   |   |   | 1 |   | some support | 0 | 0 |
| 1 | 3 years or few | 1 | 1 |   |   |   |   | some support | 0 | 0 |
| 2 | more than 12   | 0 | 0 | 0 | 0 | 0 | 0 | some support | 0 | 0 |
| 2 | 3 years or few | 0 | 0 | 0 | 0 | 0 | 0 | no support   |   |   |
| 2 | 4-12 years     | 0 | 0 | 0 | 0 | 0 | 0 | some support | 1 | 1 |
| 1 | more than 12   | 0 | 0 | 0 | 0 | 0 | 0 | some support | 0 | 0 |
| 2 | more than 12   | 0 | 0 | 0 | 0 | 0 | 0 | some support | 0 | 0 |
| 1 | more than 12   | 1 |   |   |   | 1 |   | no support   |   |   |
| 2 | 3 years or few | 0 | 0 | 0 | 0 | 0 | 0 | no support   |   |   |
| 2 | 4-12 years     | 1 |   |   |   | 1 |   | no support   |   |   |
| 2 | more than 12   | 0 | 0 | 0 | 0 | 0 | 0 | some support | 1 | 1 |
| 2 | more than 12   | 0 | 0 | 0 | 0 | 0 | 0 | some support | 0 | 0 |
| 2 | 4-12 years     | 1 |   |   |   | 1 |   | some support | 0 | 0 |

|   |                    |   |   |   |   |   |   |              |   |   |
|---|--------------------|---|---|---|---|---|---|--------------|---|---|
| 2 | 4-12 years         | 1 |   |   |   | 1 |   | some support | 0 | 0 |
| 2 | 3 years or few     | 0 | 0 | 0 | 0 | 0 | 0 | some support | 1 | 0 |
| 1 | 3 years or few     | 0 |   |   |   |   |   | some support | 0 | 0 |
| 2 | more than 12       | 0 | 0 | 0 | 0 | 0 | 0 | some support | 1 | 0 |
| 2 | 3 years or few     | 0 | 0 | 0 | 0 | 0 | 0 | some support | 1 | 0 |
| 1 | 4-12 years         | 0 | 0 | 0 | 0 | 0 | 0 | some support | 1 | 0 |
| 2 | 3 years or few     | 0 |   |   |   |   |   | some support | 0 | 0 |
| 2 | 4-12 years         | 1 |   |   |   | 1 |   | some support | 0 | 0 |
| 2 | 4-12 years         | 0 | 0 | 0 | 0 | 0 | 0 | some support | 0 | 0 |
| 2 | 4-12 years         | 0 | 0 | 0 | 0 | 0 | 0 | no support   |   |   |
|   |                    | 0 |   |   |   |   |   |              |   |   |
| 2 | 4-12 years         | 0 | 0 | 0 | 0 | 0 | 0 | some support | 1 | 1 |
| 2 | 4-12 years         | 0 | 0 | 0 | 0 | 0 | 0 | some support | 0 | 0 |
| 2 | 4-12 years         | 0 | 0 | 0 | 0 | 0 | 0 | some support | 1 | 0 |
| 1 | 4-12 years         | 0 | 0 | 0 | 0 | 0 | 0 | no support   |   |   |
| 2 | 4-12 years         | 1 |   |   |   | 1 |   | some support | 0 | 0 |
| 2 | 4-12 years         | 1 |   | 1 |   | 1 |   | some support | 0 | 0 |
| 2 | 3 years or few     | 1 |   |   |   | 1 |   | some support | 1 | 0 |
| 2 | more than 12       | 1 |   |   |   | 1 |   | some support | 1 | 0 |
| 2 | more than 12 years |   |   |   |   |   |   | some support | 1 | 1 |
| 2 | 3 years or few     | 0 | 0 | 0 | 0 | 0 | 0 | some support | 1 | 0 |
| 2 | more than 12       | 0 | 0 | 0 | 0 | 0 | 0 | some support | 0 | 0 |
| 2 | 4-12 years         | 0 | 0 | 0 | 0 | 0 | 0 | some support | 0 | 0 |
| 2 | 4-12 years         | 0 | 0 | 0 | 0 | 0 | 0 | some support | 0 | 0 |
| 2 | 4-12 years         | 0 | 0 | 0 | 0 | 0 | 0 | some support | 1 | 0 |
| 2 | 3 years or few     | 0 | 0 | 0 | 0 | 0 | 0 | some support | 0 | 0 |
| 2 | 3 years or few     | 0 | 0 | 0 | 0 | 0 | 0 | some support | 1 | 1 |
| 2 | 3 years or few     | 0 | 0 | 0 | 0 | 0 | 0 | no support   |   |   |
| 2 | 4-12 years         | 0 | 0 | 0 | 0 | 0 | 0 | no support   |   |   |
| 2 | 3 years or few     | 0 | 0 | 0 | 0 | 0 | 0 | some support | 1 | 0 |

|   |                |   |   |   |   |   |   |              |   |   |
|---|----------------|---|---|---|---|---|---|--------------|---|---|
| 1 | more than 12   | 0 | 0 | 0 | 0 | 0 | 0 | some support | 1 | 0 |
| 2 | more than 12   | 0 |   |   |   |   |   | some support | 1 | 0 |
| 2 | more than 12   | 0 | 0 | 0 | 0 | 0 | 0 | some support | 1 | 0 |
| 1 | 4-12 years     | 0 | 0 | 0 | 0 | 0 | 0 | no support   |   |   |
| 1 | 4-12 years     | 0 | 0 | 0 | 0 | 0 | 0 | some support | 1 | 0 |
| 2 | more than 12   | 0 | 0 | 0 | 0 | 0 | 0 | some support | 0 | 0 |
| 2 | more than 12   | 0 | 0 | 0 | 0 | 0 | 0 | no support   |   |   |
| 1 | 3 years or few | 0 |   |   |   |   |   | some support | 0 | 0 |
| 1 | more than 12   | 1 |   |   |   |   | 1 | some support | 1 | 1 |
| 2 | 4-12 years     | 1 |   |   |   |   | 1 | some support | 0 | 0 |
| 2 | more than 12   | 1 |   |   |   |   | 1 | no support   |   |   |
| 2 | 3 years or few | 0 |   |   |   |   |   | no support   |   |   |
| 2 | more than 12   | 0 | 0 | 0 | 0 | 0 | 0 | some support | 0 | 0 |
| 2 | 4-12 years     | 0 | 0 | 0 | 0 | 0 | 0 | some support | 1 | 1 |
| 2 | 4-12 years     | 0 | 0 | 0 | 0 | 0 | 0 | some support | 0 | 0 |
| 1 | 4-12 years     | 0 | 0 | 0 | 0 | 0 | 0 | some support | 0 | 0 |
| 2 | more than 12   | 0 | 0 | 0 | 0 | 0 | 0 | some support | 1 | 0 |
| 2 | 4-12 years     | 0 | 0 | 0 | 0 | 0 | 0 | some support | 0 | 0 |
| 2 | 4-12 years     | 0 |   |   |   |   |   | some support | 1 | 0 |
| 2 | 4-12 years     | 0 | 0 | 0 | 0 | 0 | 0 | some support | 1 | 0 |
| 2 | 4-12 years     | 0 | 0 | 0 | 0 | 0 | 0 | some support | 0 | 0 |
| 2 | more than 12   | 0 | 0 | 0 | 0 | 0 | 0 | some support | 0 | 0 |
| 2 | 3 years or few | 0 | 0 | 0 | 0 | 0 | 0 | some support | 1 | 0 |
| 2 | more than 12   | 0 | 0 | 0 | 0 | 0 | 0 | some support | 0 | 0 |
| 2 | 4-12 years     | 0 | 0 | 0 | 0 | 0 | 0 | some support | 1 | 0 |
| 2 | more than 12   | 0 | 0 | 0 | 0 | 0 | 0 | no support   |   |   |
| 2 | more than 12   | 0 | 0 | 0 | 0 | 0 | 0 | some support | 0 | 0 |
| 2 | 3 years or few | 1 |   | 1 |   |   |   | no support   |   |   |
| 2 | more than 12   | 1 |   |   |   |   | 1 | some support | 1 | 0 |
| 2 | more than 12   | 0 | 0 | 0 | 0 | 0 | 0 | some support | 0 | 0 |



|   |                |   |   |   |   |   |   |              |   |   |
|---|----------------|---|---|---|---|---|---|--------------|---|---|
| 2 | 4-12 years     | 0 |   |   |   |   |   | no support   |   |   |
| 2 | 4-12 years     | 0 | 0 | 0 | 0 | 0 | 0 | some support | 0 | 0 |
| 2 | 4-12 years     | 1 |   |   |   |   | 1 | some support | 1 | 0 |
| 2 | more than 12   | 0 |   |   |   |   |   | some support | 1 | 0 |
|   | 4-12 years     | 0 | 0 | 0 | 0 | 0 | 0 | some support | 0 | 0 |
| 2 | 3 years or few | 1 |   |   |   |   | 1 | some support | 1 | 1 |
|   | more than 12   | 1 |   |   |   |   | 1 | some support | 1 | 0 |
| 2 | 3 years or few | 0 | 0 | 0 | 0 | 0 | 0 | some support | 0 | 0 |
| 2 | 4-12 years     | 0 | 0 | 0 | 0 | 0 | 0 | some support | 1 | 0 |
| 1 | 3 years or few | 1 |   |   |   |   | 1 | some support | 0 | 0 |
| 2 | more than 12   | 0 | 0 | 0 | 0 | 0 | 0 | some support | 0 | 0 |
| 1 | 4-12 years     | 0 | 0 | 0 | 0 | 0 | 0 | no support   |   |   |
| 2 | 4-12 years     | 0 | 0 | 0 | 0 | 0 | 0 | some support | 0 | 0 |
| 2 | 3 years or few | 0 | 0 | 0 | 0 | 0 | 0 | some support | 1 | 0 |
| 2 | more than 12   | 1 |   |   |   |   | 1 | some support | 1 | 0 |
| 2 |                | 0 | 0 | 0 | 0 | 0 | 0 | no support   |   |   |
| 2 | 4-12 years     | 0 | 0 | 0 | 0 | 0 | 0 | some support | 1 | 0 |
| 2 | 3 years or few | 1 | 1 |   |   |   |   | some support | 0 | 0 |
| 2 | 4-12 years     | 1 |   |   |   |   | 1 | some support | 1 | 0 |
| 2 | more than 12   | 0 | 0 | 0 | 0 | 0 | 0 | some support | 1 | 0 |
| 2 | 3 years or few | 0 |   |   |   |   |   | some support | 0 | 0 |
| 2 | 4-12 years     | 0 | 0 | 0 | 0 | 0 | 0 | some support | 0 | 0 |
| 2 | 4-12 years     | 0 | 0 | 0 | 0 | 0 | 0 | some support | 0 | 0 |
| 2 | 4-12 years     | 1 |   |   |   |   | 1 | some support | 0 | 0 |
| 2 | 4-12 years     | 0 | 0 | 0 | 0 | 0 | 0 | no support   |   |   |
| 1 | more than 12   | 0 | 0 | 0 | 0 | 0 | 0 | some support | 1 | 0 |
| 2 | more than 12   | 0 |   |   |   |   |   | no support   |   |   |
| 2 | 4-12 years     | 1 |   |   |   |   | 1 | some support | 0 | 0 |
| 2 | 4-12 years     | 1 |   |   |   |   | 1 | some support | 0 | 0 |
| 2 | 4-12 years     | 1 | 1 |   |   |   |   | some support | 0 | 0 |

|   |                |   |   |   |   |   |   |   |                |   |   |
|---|----------------|---|---|---|---|---|---|---|----------------|---|---|
| 2 | 3 years or few | 0 | 0 | 0 | 0 | 0 | 0 | 0 | some support   | 0 | 0 |
| 2 | 4-12 years     | 0 | 0 | 0 | 0 | 0 | 0 | 0 | some support   | 1 | 0 |
| 2 | 3 years or few | 0 | 0 | 0 | 0 | 0 | 0 | 0 | some support   | 0 | 0 |
| 2 | 4-12 years     | 0 | 0 | 0 | 0 | 0 | 0 | 0 | some support   | 1 | 0 |
| 1 | 4-12 years     | 0 | 0 | 0 | 0 | 0 | 0 | 0 | some support   | 1 | 0 |
| 2 | more than 12   | 0 | 0 | 0 | 0 | 0 | 0 | 0 | some support   | 1 | 0 |
| 1 | 4-12 years     | 0 |   |   |   |   |   |   | some support   | 0 | 0 |
| 1 | 3 years or few | 0 | 0 | 0 | 0 | 0 | 0 | 0 | some support   | 1 | 0 |
| 1 | 4-12 years     | 1 | 1 |   |   |   |   |   | some support   | 0 | 0 |
| 1 | more than 12   | 1 |   |   |   |   |   | 1 | no support     |   |   |
| 2 | 4-12 years     | 1 |   |   |   |   | 1 |   | no support     |   |   |
| 1 | 3 years or few | 0 |   |   |   |   |   |   | some support   | 1 | 0 |
| 1 | 4-12 years     | 0 | 0 | 0 | 0 | 0 | 0 | 0 | some support   | 0 | 0 |
| 2 | 3 years or few | 0 | 0 | 0 | 0 | 0 | 0 | 0 | some support   | 1 | 0 |
| 1 | 4-12 years     | 1 |   |   |   |   | 1 |   | some support   | 0 | 0 |
| 1 | 4-12 years     | 0 | 0 | 0 | 0 | 0 | 0 | 0 | some support   | 1 | 1 |
| 1 | 3 years or few | 0 | 0 | 0 | 0 | 0 | 0 | 0 | some support   | 1 | 0 |
| 2 | 4-12 years     | 1 |   |   |   |   |   |   | 1 some support | 1 | 0 |
| 1 | 4-12 years     | 0 | 0 | 0 | 0 | 0 | 0 | 0 | some support   | 0 | 0 |
| 2 | more than 12   | 1 |   |   |   |   | 1 |   | some support   | 1 | 0 |
| 1 | 4-12 years     | 0 |   |   |   |   |   |   | some support   | 1 | 0 |
| 1 | 3 years or few | 0 | 0 | 0 | 0 | 0 | 0 | 0 | some support   | 1 | 0 |
| 1 | 4-12 years     | 0 | 0 | 0 | 0 | 0 | 0 | 0 | some support   | 0 | 0 |
| 2 | 3 years or few | 0 | 0 | 0 | 0 | 0 | 0 | 0 | some support   | 1 | 0 |
| 2 | 4-12 years     | 0 | 0 | 0 | 0 | 0 | 0 | 0 | some support   | 1 | 0 |
| 2 | 3 years or few | 0 | 0 | 0 | 0 | 0 | 0 | 0 | some support   | 1 | 0 |
| 1 | 3 years or few | 0 | 0 | 0 | 0 | 0 | 0 | 0 | some support   | 0 | 0 |
| 1 | more than 12   | 0 |   |   |   |   |   |   | some support   | 0 | 0 |
| 2 | more than 12   | 1 | 1 |   |   |   |   |   | some support   | 1 | 0 |
| 2 | 4-12 years     | 0 | 0 | 0 | 0 | 0 | 0 | 0 | some support   | 1 | 0 |

|   |                |   |   |   |   |   |   |              |   |   |
|---|----------------|---|---|---|---|---|---|--------------|---|---|
| 1 | 3 years or few | 1 |   |   |   | 1 |   | some support | 1 | 1 |
| 1 | 4-12 years     | 0 | 0 | 0 | 0 | 0 | 0 | some support | 1 | 1 |
| 1 | 4-12 years     | 1 |   |   |   | 1 |   | no support   |   |   |
| 1 | 4-12 years     | 0 | 0 | 0 | 0 | 0 | 0 | some support | 1 | 0 |
| 1 | more than 12   | 1 |   |   |   | 1 |   | some support | 1 | 0 |
| 1 | 3 years or few | 0 | 0 | 0 | 0 | 0 | 0 | some support | 0 | 0 |
| 1 | 3 years or few | 0 | 0 | 0 | 0 | 0 | 0 | some support | 1 | 1 |
| 1 | 3 years or few | 0 | 0 | 0 | 0 | 0 | 0 | some support | 0 | 0 |
| 2 | 3 years or few | 0 | 0 | 0 | 0 | 0 | 0 | some support | 1 | 0 |
| 1 | 4-12 years     | 0 |   |   |   |   |   | some support | 0 | 0 |
| 2 | more than 12   | 1 |   |   |   | 1 |   | some support | 1 | 0 |
| 1 | 4-12 years     | 0 | 0 | 0 | 0 | 0 | 0 | some support | 0 | 0 |
| 1 | 3 years or few | 0 | 0 | 0 | 0 | 0 | 0 | some support | 1 | 0 |
|   |                | 0 |   |   |   |   |   |              |   |   |
| 1 | 3 years or few | 0 | 0 | 0 | 0 | 0 | 0 | some support | 0 | 0 |
| 1 | 4-12 years     | 1 |   |   |   | 1 |   | some support | 0 | 0 |
| 1 | 3 years or few | 0 | 0 | 0 | 0 | 0 | 0 | some support | 0 | 0 |
| 2 | more than 12   | 1 |   |   |   | 1 |   | no support   |   |   |
| 2 | 4-12 years     | 0 | 0 | 0 | 0 | 0 | 0 | some support | 1 | 1 |
| 1 | 4-12 years     | 0 |   |   |   |   |   | some support | 0 | 0 |
| 1 | 4-12 years     | 0 | 0 | 0 | 0 | 0 | 0 | some support | 1 | 0 |
| 1 | 3 years or few | 1 |   |   |   | 1 |   | some support | 0 | 0 |
| 2 | 4-12 years     | 0 |   |   |   |   |   | some support | 1 | 0 |
| 1 | 3 years or few | 1 |   |   |   | 1 |   | some support | 1 | 0 |
| 1 | more than 12   | 0 |   |   |   |   |   | some support | 0 | 0 |
| 2 | more than 12   | 0 | 0 | 0 | 0 | 0 | 0 | no support   |   |   |
| 1 | 3 years or few | 0 | 0 | 0 | 0 | 0 | 0 | some support | 1 | 0 |
| 2 | 4-12 years     | 1 |   |   |   | 1 |   | some support | 1 | 0 |
| 2 | more than 12   | 1 |   |   |   | 1 |   | some support | 1 | 0 |
| 2 | more than 12   | 1 |   |   |   | 1 |   | some support | 1 | 0 |

|   |                |   |   |   |   |   |   |                |   |   |
|---|----------------|---|---|---|---|---|---|----------------|---|---|
| 1 | more than 12   | 0 | 0 | 0 | 0 | 0 | 0 | no support     |   |   |
| 2 | 4-12 years     | 1 |   |   |   |   | 1 | some support   | 0 | 0 |
| 2 | 3 years or few | 0 | 0 | 0 | 0 | 0 | 0 | some support   | 0 | 0 |
| 2 | 3 years or few | 1 |   |   |   |   | 1 | some support   | 1 | 1 |
| 2 | 4-12 years     | 0 |   |   |   |   |   | no support     |   |   |
| 2 | more than 12   | 0 | 0 | 0 | 0 | 0 | 0 | some support   | 0 | 0 |
| 2 | more than 12   | 1 |   |   |   |   | 1 | some support   | 1 | 0 |
| 2 | more than 12   | 1 |   |   |   |   | 1 | no support     |   |   |
| 1 | 3 years or few | 0 | 0 | 0 | 0 | 0 | 0 | some support   | 0 | 0 |
| 1 | 4-12 years     | 0 | 0 | 0 | 0 | 0 | 0 | some support   | 1 | 0 |
| 1 | 3 years or few | 0 | 0 | 0 | 0 | 0 | 0 | some support   | 0 | 0 |
| 1 | more than 12   | 0 | 0 | 0 | 0 | 0 | 0 | some support   | 1 | 1 |
| 2 | 4-12 years     | 1 |   |   |   |   | 1 | some support   | 0 | 0 |
| 2 | 4-12 years     | 0 | 0 | 0 | 0 | 0 | 0 | some support   | 1 | 0 |
| 2 | 4-12 years     | 1 |   |   |   |   |   | 1 some support | 1 | 1 |
| 2 | more than 12   | 1 |   |   |   |   | 1 | some support   | 0 | 0 |
| 2 | more than 12   | 0 | 0 | 0 | 0 | 0 | 0 | some support   | 1 | 0 |
| 1 | 3 years or few | 0 | 0 | 0 | 0 | 0 | 0 | some support   | 0 | 0 |
| 1 |                | 1 |   |   |   |   | 1 | some support   | 0 | 0 |
| 2 | 4-12 years     | 1 |   |   |   |   | 1 | some support   | 0 | 0 |
| 1 | 3 years or few | 1 |   |   |   |   | 1 | some support   | 0 | 0 |
| 2 | 4-12 years     | 1 |   |   |   |   | 1 | some support   | 1 | 1 |
| 2 | 4-12 years     | 0 | 0 | 0 | 0 | 0 | 0 | some support   | 1 | 1 |
| 1 | more than 12   | 1 |   |   |   |   | 1 | 1 no support   |   |   |
| 1 | more than 12   | 1 |   |   |   |   | 1 | some support   | 1 | 0 |
| 2 | 4-12 years     | 0 | 0 | 0 | 0 | 0 | 0 | some support   | 0 | 0 |
| 2 | 4-12 years     | 0 | 0 | 0 | 0 | 0 | 0 | no support     |   |   |
| 2 | 3 years or few | 0 |   |   |   |   |   | some support   | 1 | 1 |
| 2 | 4-12 years     | 0 |   |   |   |   |   | some support   | 1 | 0 |
| 2 | 4-12 years     | 1 |   |   |   |   | 1 | some support   | 0 | 0 |

|   |                |   |   |   |   |   |   |              |   |   |
|---|----------------|---|---|---|---|---|---|--------------|---|---|
| 1 | more than 12   | 0 | 0 | 0 | 0 | 0 | 0 | some support | 1 | 0 |
| 2 | 4-12 years     | 0 | 0 | 0 | 0 | 0 | 0 | some support | 0 | 0 |
| 2 | 3 years or few | 1 | 1 | 1 |   |   |   | some support | 1 | 1 |
| 2 | more than 12   | 0 |   |   |   |   |   | some support | 0 | 0 |
| 1 | more than 12   | 1 |   |   |   | 1 |   | some support | 0 | 0 |
| 1 | 4-12 years     | 0 | 0 | 0 | 0 | 0 | 0 | some support | 0 | 0 |
| 2 | more than 12   | 1 |   |   |   | 1 |   | some support | 0 | 0 |
| 2 | more than 12   | 1 |   |   |   | 1 |   | no support   |   |   |
| 2 | 3 years or few | 1 |   |   |   | 1 | 1 | some support | 1 | 1 |
| 2 | 4-12 years     | 1 |   |   |   | 1 |   | some support | 0 | 0 |
| 2 | 3 years or few | 0 | 0 | 0 | 0 | 0 | 0 | some support | 1 | 1 |
| 2 | 4-12 years     | 1 |   |   |   | 1 |   | no support   |   |   |
| 2 | 3 years or few | 0 |   |   |   |   |   | some support | 0 | 0 |
| 2 | 4-12 years     | 0 | 0 | 0 | 0 | 0 | 0 | some support | 1 | 0 |
| 2 | more than 12   | 0 | 0 | 0 | 0 | 0 | 0 | some support | 1 | 0 |
| 2 | more than 12   | 1 |   |   |   | 1 |   | some support | 0 | 0 |
| 1 | more than 12   | 0 | 0 | 0 | 0 | 0 | 0 | some support | 0 | 0 |
| 1 | 3 years or few | 0 |   |   |   |   |   | no support   |   |   |
| 1 | 3 years or few | 0 | 0 | 0 | 0 | 0 | 0 | some support | 0 | 0 |
| 2 | 3 years or few | 1 |   |   |   | 1 |   | some support | 0 | 0 |
| 2 | 4-12 years     | 0 |   |   |   |   |   | some support | 0 | 0 |
| 2 | 4-12 years     | 1 |   |   |   | 1 |   | some support | 1 | 0 |
| 2 | 4-12 years     | 1 |   |   |   | 1 |   | some support | 0 | 0 |
| 2 | 4-12 years     | 1 |   |   |   | 1 |   | some support | 0 | 0 |
| 2 | more than 12   | 1 |   |   |   | 1 |   | some support | 0 | 0 |
| 2 | more than 12   | 1 | 1 |   |   |   |   | some support | 0 | 0 |
| 2 | more than 12   | 1 |   |   |   | 1 |   | some support | 0 | 0 |
| 2 |                | 0 |   |   |   |   |   | some support | 0 | 0 |
| 1 | 4-12 years     | 1 | 1 |   |   | 1 |   | some support | 1 | 0 |
| 1 |                | 0 |   |   |   |   |   |              |   |   |

|   |                |   |   |   |   |   |   |              |   |   |
|---|----------------|---|---|---|---|---|---|--------------|---|---|
| 1 | more than 12   | 1 |   |   |   | 1 |   | some support | 1 | 1 |
| 2 | more than 12   | 0 |   |   |   |   |   | some support | 1 | 0 |
| 1 | 4-12 years     | 0 | 0 | 0 | 0 | 0 | 0 | some support | 1 | 0 |
| 2 | 4-12 years     | 0 |   |   |   |   |   | some support | 0 | 0 |
| 2 | more than 12   | 0 |   |   |   |   |   | some support | 0 | 0 |
| 1 | 4-12 years     | 0 | 0 | 0 | 0 | 0 | 0 | some support | 1 | 0 |
| 1 | 3 years or few | 0 |   |   |   |   |   | some support | 0 | 0 |
| 1 | 4-12 years     | 1 |   |   |   | 1 |   | some support | 0 | 0 |
| 2 | 3 years or few | 1 | 1 |   |   | 1 |   | some support | 0 | 0 |
| 1 | 4-12 years     | 0 | 0 | 0 | 0 | 0 | 0 | some support | 0 | 0 |
| 1 | more than 12   | 0 |   |   |   |   |   | no support   |   |   |
| 2 | more than 12   | 1 |   |   |   | 1 |   | some support | 0 | 0 |
| 2 | 4-12 years     | 0 | 0 | 0 | 0 | 0 | 0 | some support | 1 | 0 |
| 1 | 4-12 years     | 0 | 0 | 0 | 0 | 0 | 0 | some support | 0 | 0 |

| Apoy_cuid | Apoy_afect | Apoy_otro | p57 | p59 | p85                 | p96 | conocDM | scare | p43     | trad2 |
|-----------|------------|-----------|-----|-----|---------------------|-----|---------|-------|---------|-------|
|           |            |           | 0   | 0   | lives with relative | 0   | 0       | 1     | Yes     | 0     |
|           |            |           | 0   | 0   | lives with relative | 1   | 0       | 0     | Yes     | 0     |
|           |            |           | 0   | 0   | lives with relative | 0   | 0       | 0     | Yes     | 0     |
| 0         | 0          | 0         | 0   | 0   | lives with relative | 1   | 0       | 1     | Yes     | 0     |
|           |            |           | 0   | 0   | lives with relative | 0   | 0       | 0     | Yes     | 0     |
| 0         | 0          | 0         | 0   | 0   | lives with relative | 0   | 0       | 0     | Yes     | 0     |
| 0         | 0          | 0         | 0   | 0   | lives with relative | 1   | 0       | 0     | Yes     | 0     |
| 0         | 0          | 0         | 0   | 0   | lives with relative | 1   | 0       | 0     | Yes     | 0     |
| 0         | 0          | 0         | 0   | 0   | lives with relative | 0   | 0       | 0     | Yes     | 0     |
| 0         | 0          | 0         | 0   | 0   | lives alone         | 0   | 0       | 0     | Yes     | 0     |
| 0         | 0          | 0         | 0   | 0   | lives with relative | 1   | 0       | 0     | Yes     | 0     |
| 0         | 1          | 0         | 0   | 0   | lives with relative | 1   | 0       | 0     | Yes     | 0     |
| 0         | 1          | 0         | 0   | 0   | lives with relative | 1   | 0       | 0     | Yes     | 0     |
| 0         | 0          | 0         | 0   | 0   | lives with relative | 0   | 0       | 0     | Yes     | 0     |
| 0         | 0          | 0         | 0   | 0   | lives alone         | 0   | 0       | 0     | Yes     | 0     |
| 0         | 0          | 0         | 0   | 0   | lives with relative | 1   | 0       | 0     | Yes     | 0     |
| 0         | 1          | 0         | 0   | 0   | lives with relative | 1   | 0       | 0     | regular | 0     |
| 0         | 0          | 0         | 0   | 0   | lives with relative | 1   | 0       | 0     | Yes     | 0     |
| 0         | 0          | 0         | 0   | 0   | lives with relative | 1   | 0       | 0     | Yes     | 0     |
| 0         | 0          | 0         | 0   | 0   | lives with relative | 1   | 0       | 0     | Yes     | 0     |
|           |            |           | 0   | 0   | lives with relative | 1   | 0       | 0     | Yes     | 0     |
| 1         | 0          | 0         | 0   | 0   | lives with relative | 1   | 0       | 0     | Yes     | 0     |
| 0         | 1          | 0         | 0   | 0   | lives with relative | 0   | 0       | 0     | Yes     | 0     |
|           |            |           | 0   | 0   | lives with relative | 1   | 0       | 0     | Yes     | 0     |
|           |            |           | 1   | 1   | lives with relative | 1   | 0       | 0     | Yes     | 0     |
| 0         | 0          | 0         | 0   | 0   | lives with relative | 1   | 0       | 0     | Yes     | 0     |
| 0         | 0          | 0         | 0   | 0   | lives with relative | 1   | 0       | 1     | Yes     | 0     |
| 0         | 0          | 0         | 0   | 0   | lives with relative | 0   | 0       | 0     | Yes     | 0     |
|           |            |           | 0   | 0   | lives with relative | 0   | 0       | 0     | Yes     | 0     |

|   |   |   |   |   |                     |   |   |   |         |   |
|---|---|---|---|---|---------------------|---|---|---|---------|---|
| 1 | 0 | 0 | 0 | 0 | lives with relative | 0 | 0 | 0 | Yes     | 0 |
|   |   |   | 0 | 0 | lives with relative | 1 | 0 | 0 | regular | 0 |
|   |   |   | 0 | 0 | lives with relative | 1 | 0 | 0 | Yes     | 0 |
| 1 | 0 | 0 | 0 | 0 | lives with relative | 0 | 0 | 0 | Yes     | 0 |
| 0 | 0 | 0 | 0 | 0 | lives with relative | 1 | 0 | 0 | Yes     | 0 |
|   |   |   | 0 | 1 | lives with relative | 0 | 0 | 0 | Yes     | 0 |
|   |   |   | 0 | 1 | lives with relative | 0 | 0 | 0 | Yes     | 0 |
| 0 | 0 | 1 | 0 | 0 | lives with relative | 1 | 0 | 0 | Yes     | 0 |
| 0 | 1 | 0 | 0 | 0 | lives alone         | 0 | 0 | 0 | Yes     | 0 |
| 0 | 0 | 0 | 0 | 0 | lives with relative | 0 | 0 | 0 | Yes     | 0 |
| 0 | 0 | 0 | 0 | 0 | lives with relative | 0 | 0 | 0 | Yes     | 0 |
| 0 | 0 | 0 | 0 | 0 | lives with relative | 0 | 0 | 0 | Yes     | 0 |
| 0 | 0 | 0 | 0 | 0 | lives with relative | 0 | 0 | 0 | Yes     | 0 |
| 0 | 1 | 0 | 0 | 0 | lives with relative | 1 | 0 | 0 | Yes     | 0 |
|   |   |   | 0 | 0 | lives alone         | 0 | 0 | 0 | Yes     | 0 |
| 0 | 0 | 0 | 0 | 0 | lives with relative | 0 | 0 | 0 | No      | 0 |
| 0 | 0 | 0 | 0 | 0 | lives with relative | 1 | 0 | 1 | Yes     | 0 |
| 0 | 0 | 0 | 0 | 0 | lives with relative | 1 | 0 | 1 | Yes     | 0 |
| 0 | 0 | 0 | 0 | 0 | lives with relative | 1 | 0 | 0 | Yes     | 0 |
| 0 | 0 | 0 | 0 | 0 | lives with relative | 0 | 0 | 0 | Yes     | 0 |
| 0 | 1 | 0 | 0 | 0 | lives with relative | 0 | 0 | 0 | Yes     | 0 |
| 0 | 1 | 0 | 0 | 0 | lives with relative | 1 | 0 | 0 | Yes     | 0 |
| 0 | 0 | 0 | 0 | 0 | lives with relative | 0 | 0 | 0 | Yes     | 0 |
| 0 | 0 | 0 | 0 | 0 | lives with relative | 0 | 0 | 0 | Yes     | 0 |
| 1 | 0 | 0 | 0 | 0 | lives with relative | 0 | 0 | 1 | Yes     | 0 |
| 0 | 1 | 0 | 0 | 0 | lives with relative | 1 | 0 | 0 | Yes     | 0 |
| 0 | 0 | 0 | 0 | 0 | lives with relative | 0 | 0 | 0 | Yes     | 0 |
| 0 | 0 | 0 | 0 | 0 | lives with relative | 0 | 0 | 0 | Yes     | 0 |
| 0 | 0 | 0 | 0 | 0 | lives with relative | 1 | 0 | 0 | Yes     | 0 |
| 0 | 0 | 0 | 0 | 0 | lives with relative | 0 | 0 | 0 | Yes     | 0 |



|   |   |   |   |   |                     |   |   |   |         |   |
|---|---|---|---|---|---------------------|---|---|---|---------|---|
| 0 | 0 | 0 | 0 | 0 | lives with relative | 0 | 0 | 0 | Yes     | 0 |
| 0 | 1 | 0 | 0 | 0 | lives with relative | 0 | 0 | 0 | Yes     | 0 |
| 0 | 0 | 1 | 0 | 0 | lives with relative | 1 | 0 | 0 | Yes     | 0 |
| 0 | 0 | 0 | 0 | 0 | lives with relative | 1 | 0 | 0 | Yes     | 0 |
| 0 | 0 | 0 | 0 | 0 | lives with relative | 0 | 0 | 0 | Yes     | 0 |
| 0 | 0 | 0 | 0 | 0 | lives with relative | 1 | 0 | 0 | Yes     | 0 |
|   |   |   | 0 | 0 | lives with relative | 1 | 0 | 0 | Yes     | 0 |
|   |   |   | 0 | 0 | lives with relative | 0 | 0 | 0 | Yes     | 0 |
|   |   |   | 0 | 0 | lives with relative | 0 | 0 | 0 | Yes     | 0 |
|   |   |   | 0 | 0 | lives with relative | 0 | 0 | 0 | Yes     | 0 |
|   |   |   | 0 | 0 | lives with relative | 1 | 0 | 0 |         | 0 |
|   |   |   | 0 | 0 | lives with relative | 1 | 0 | 0 | Yes     | 0 |
|   |   |   | 1 | 0 |                     | 0 | 0 | 0 | Yes     | 0 |
|   |   |   | 0 | 0 | lives with relative | 0 | 0 | 0 |         | 0 |
| 1 | 0 | 0 | 0 | 0 | lives with relative | 1 | 0 | 0 |         | 0 |
|   |   |   | 0 | 0 |                     | 0 | 0 | 0 | Yes     | 0 |
| 0 | 0 | 1 | 0 | 0 | lives with relative | 1 | 0 | 0 |         | 0 |
| 0 | 0 | 0 | 0 | 0 | lives with relative | 0 | 0 | 0 |         | 0 |
| 0 | 0 | 0 | 0 | 0 | lives with relative | 1 | 0 | 0 | Yes     | 0 |
| 0 | 0 | 0 | 0 | 1 | lives with relative | 1 | 0 | 1 | Yes     | 0 |
|   |   |   | 0 | 0 | lives with relative | 0 | 0 | 0 | Yes     | 0 |
|   |   |   | 0 | 0 | lives with relative | 0 | 0 | 0 | Yes     | 0 |
|   |   |   | 0 | 0 | lives with relative | 0 | 0 | 0 | regular | 0 |
| 1 | 0 | 0 | 0 | 0 | lives with relative | 1 | 0 | 0 | regular | 0 |
| 0 | 0 | 0 | 0 | 0 | lives with relative | 0 | 0 | 0 | Yes     | 0 |
| 0 | 0 | 0 | 0 | 0 | lives with relative | 0 | 0 | 1 | Yes     | 0 |
| 1 | 0 | 0 | 0 | 1 | lives with relative | 1 | 0 | 0 | Yes     | 0 |
| 0 | 0 | 0 | 0 | 1 | lives with relative | 1 | 0 | 0 | Yes     | 0 |
| 1 | 0 | 0 | 0 | 0 | lives with relative | 0 | 0 | 0 | Yes     | 1 |
| 0 | 0 | 0 | 0 | 0 | lives with relative | 1 | 0 | 0 | Yes     | 0 |

|   |   |   |   |   |                     |   |   |   |         |   |
|---|---|---|---|---|---------------------|---|---|---|---------|---|
| 0 | 0 | 0 | 0 | 0 | lives with relative | 1 | 0 | 0 | Yes     | 0 |
| 0 | 0 | 0 | 0 | 0 | lives with relative | 1 | 0 | 0 | Yes     | 0 |
| 0 | 0 | 0 | 0 | 0 | lives with relative | 0 | 0 | 0 | Yes     | 0 |
| 0 | 0 | 0 | 0 | 0 | lives with relative | 1 | 0 | 0 | Yes     | 0 |
| 0 | 0 | 0 | 0 | 0 | lives with relative | 0 | 0 | 0 | Yes     | 0 |
|   |   |   | 0 | 0 | lives with relative | 0 | 0 | 0 | Yes     | 0 |
|   |   |   | 0 | 0 | lives with relative | 0 | 0 | 0 | Yes     | 0 |
| 0 | 1 | 0 | 0 | 0 | lives with relative | 0 | 0 | 0 | regular | 0 |
| 0 | 0 | 0 | 0 | 0 | lives alone         | 1 | 0 | 0 | Yes     | 0 |
|   |   |   | 0 | 0 | lives with relative | 1 | 0 | 0 | Yes     | 0 |
| 1 | 0 | 0 | 0 | 0 | lives with relative | 0 | 0 | 0 | Yes     | 0 |
| 0 | 0 | 0 | 0 | 0 | lives with relative | 0 | 0 | 0 | Yes     | 0 |
| 0 | 0 | 0 | 0 | 0 | lives with relative | 0 | 0 | 0 | Yes     | 0 |
| 0 | 0 | 0 | 0 | 0 | lives with relative | 1 | 0 | 0 | Yes     | 0 |
|   |   |   | 0 | 0 | lives alone         | 1 | 0 | 0 | Yes     | 0 |
| 0 | 0 | 0 | 0 | 0 | lives with relative | 0 | 0 | 0 | Yes     | 0 |
| 1 | 0 | 0 | 0 | 0 | lives with relative | 0 | 0 | 0 | Yes     | 0 |
|   |   |   | 0 | 0 | lives with relative | 1 | 0 | 0 | Yes     | 0 |
| 1 | 0 | 0 | 0 | 0 | lives with relative | 1 | 0 | 0 | Yes     | 0 |
| 1 | 0 | 1 | 0 | 0 | lives with relative | 0 | 0 | 0 | Yes     | 0 |
| 0 | 1 | 0 | 0 | 0 | lives with relative | 0 | 0 | 0 | Yes     | 0 |
|   |   |   | 0 | 0 | lives with relative | 1 | 0 | 0 | Yes     | 0 |
| 1 | 0 | 0 | 0 | 0 | lives with relative | 1 | 0 | 0 | Yes     | 0 |
| 0 | 0 | 0 | 0 | 0 | lives with relative | 1 | 0 | 0 | regular | 0 |
| 0 | 0 | 0 | 1 | 1 | lives with relative | 1 | 0 | 0 | Yes     | 0 |
| 0 | 0 | 0 | 0 | 0 | lives with relative | 1 | 0 | 0 | Yes     | 0 |
| 1 | 0 | 0 | 0 | 0 | lives with relative | 0 | 0 | 0 | Yes     | 0 |
| 0 | 1 | 0 | 0 | 0 | lives with relative | 0 | 0 | 0 | Yes     | 0 |
| 1 | 0 | 0 | 0 | 0 | lives with relative | 0 | 0 | 0 | Yes     | 0 |
| 0 | 0 | 0 | 0 | 0 | lives with relative | 0 | 0 | 0 | Yes     | 0 |

|   |   |   |   |   |   |                     |   |   |   |         |   |
|---|---|---|---|---|---|---------------------|---|---|---|---------|---|
| 1 | 0 | 0 | 0 | 0 | 0 | lives with relative | 1 | 0 | 0 | regular | 0 |
|   |   |   |   | 0 | 0 | lives with relative | 1 | 0 | 0 | Yes     | 0 |
| 0 | 0 | 0 | 0 | 0 | 0 | lives with relative | 1 | 0 | 0 | Yes     | 0 |
|   |   |   |   | 0 | 0 | lives with relative | 1 | 0 | 0 | Yes     | 0 |
|   |   |   |   | 0 | 0 | lives with relative | 1 | 0 | 0 | Yes     | 0 |
| 0 | 0 | 0 | 0 | 0 | 1 | lives with relative | 1 | 0 | 1 | Yes     | 0 |
|   |   |   |   | 0 | 0 | lives with relative | 0 | 0 | 0 | Yes     | 0 |
|   |   |   |   | 0 | 0 | lives with relative | 1 | 0 | 0 | Yes     | 0 |
|   |   |   |   | 0 | 0 | lives alone         | 0 | 0 | 0 | Yes     | 0 |
| 0 | 1 | 0 | 0 | 0 | 0 | lives with relative | 1 | 0 | 0 | Yes     | 0 |
| 0 | 0 | 0 | 0 | 0 | 0 | lives with relative | 1 | 0 | 0 | Yes     | 0 |
| 1 | 0 | 0 | 0 | 0 | 0 | lives with relative | 0 | 0 | 0 | Yes     | 0 |
| 0 | 0 | 0 | 0 | 0 | 0 | lives with relative | 0 | 0 | 0 | Yes     | 0 |
| 0 | 1 | 0 | 0 | 0 | 0 | lives with relative | 0 | 0 | 0 |         | 0 |
|   |   |   |   | 0 | 0 | lives alone         | 0 | 0 | 0 | Yes     | 0 |
| 0 | 1 | 0 | 0 | 0 | 0 | lives with relative | 0 | 1 | 1 | Yes     | 0 |
| 0 | 1 | 0 | 0 | 0 | 0 | lives with relative | 0 | 0 | 0 |         | 0 |
| 1 | 0 | 0 | 0 | 0 | 0 | lives with relative | 1 | 0 | 0 | Yes     | 0 |
| 0 | 0 | 0 | 0 | 0 | 0 | lives alone         | 1 | 0 | 0 | Yes     | 0 |
| 0 | 0 | 0 | 0 | 0 | 0 | lives with relative | 0 | 0 | 0 | Yes     | 0 |
| 0 | 0 | 0 | 0 | 0 | 0 | lives with relative | 1 | 0 | 0 | Yes     | 0 |
| 0 | 0 | 0 | 0 | 0 | 1 | lives with relative | 1 | 1 | 0 | Yes     | 0 |
| 0 | 0 | 0 | 0 | 0 | 0 | lives with relative | 0 | 0 | 0 | Yes     | 0 |
| 0 | 0 | 0 | 0 | 0 | 0 | lives with relative | 1 | 0 | 0 | Yes     | 0 |
|   |   |   |   | 0 | 0 | lives with relative | 0 | 0 | 0 | Yes     | 0 |
| 0 | 0 | 0 | 0 | 0 | 0 | lives with relative | 1 | 0 | 0 | Yes     | 0 |
| 1 | 0 | 0 | 0 | 0 | 0 | lives with relative | 0 | 0 | 0 | Yes     | 0 |
|   |   |   |   | 0 | 0 | lives with relative | 0 | 0 | 0 | Yes     | 0 |
| 0 | 0 | 0 | 0 | 0 | 0 | lives with relative | 1 | 0 | 1 | Yes     | 0 |
|   |   |   |   | 0 | 0 | lives with relative | 1 | 0 | 0 | Yes     | 0 |

|   |   |   |   |   |                     |   |   |   |         |   |
|---|---|---|---|---|---------------------|---|---|---|---------|---|
|   |   |   | 0 | 0 | lives with relative | 0 | 0 | 0 | Yes     | 0 |
| 1 | 0 | 0 | 0 | 0 | lives with relative | 0 | 0 | 0 | Yes     | 0 |
| 0 | 0 | 0 | 0 | 0 | lives with relative | 1 | 0 | 1 | Yes     | 0 |
| 0 | 0 | 0 | 0 | 0 | lives with relative | 0 | 0 | 0 | Yes     | 0 |
|   |   |   | 0 | 0 | lives with relative | 1 | 0 | 0 | Yes     | 0 |
| 0 | 0 | 0 | 0 | 0 | lives with relative | 0 | 0 | 0 | Yes     | 1 |
| 0 | 0 | 0 | 0 | 0 | lives with relative | 0 | 0 | 0 | Yes     | 0 |
|   |   |   | 0 | 0 | lives with relative | 0 | 0 | 0 | Yes     | 0 |
|   |   |   | 0 | 0 | lives with relative | 1 | 0 | 0 | Yes     | 0 |
| 1 | 0 | 0 | 1 | 0 | lives with relative | 1 | 0 | 0 | Yes     | 0 |
| 0 | 0 | 0 | 0 | 0 | lives with relative | 1 | 0 | 1 | regular | 0 |
| 0 | 0 | 1 | 0 | 0 | lives with relative | 0 | 0 | 0 | Yes     | 0 |
| 0 | 0 | 0 | 0 | 0 | lives with relative | 0 | 0 | 0 | Yes     | 0 |
| 0 | 0 | 0 | 0 | 0 | lives with relative | 1 | 0 | 0 | Yes     | 0 |
|   |   |   | 0 | 0 | lives with relative | 1 | 0 | 0 | No      | 0 |
| 0 | 0 | 0 | 0 | 0 | lives alone         | 0 | 0 | 0 | Yes     | 0 |
| 1 | 0 | 0 | 0 | 0 | lives with relative | 0 | 0 | 0 | Yes     | 0 |
| 1 | 0 | 0 | 0 | 0 | lives with relative | 1 | 0 | 0 | Yes     | 0 |
| 0 | 0 | 0 | 0 | 0 | lives with relative | 1 | 0 | 0 | Yes     | 0 |
| 1 | 0 | 0 | 0 | 0 | lives with relative | 1 | 0 | 0 | Yes     | 0 |
| 1 | 0 | 0 | 0 | 1 | lives with relative | 1 | 0 | 0 | regular | 0 |
|   |   |   | 0 | 0 | lives with relative | 1 | 0 | 0 | Yes     | 0 |
|   |   |   | 0 | 0 | lives with relative | 1 | 0 | 0 | Yes     | 0 |
| 1 | 0 | 0 | 0 | 0 | lives with relative | 1 | 0 | 0 | Yes     | 0 |
| 1 | 0 | 0 | 0 | 0 | lives with relative | 0 | 0 | 0 | Yes     | 0 |
|   |   |   | 0 | 1 | lives with relative | 0 | 0 | 0 | Yes     | 0 |
| 0 | 0 | 0 | 0 | 1 | lives with relative | 0 | 0 | 0 | Yes     | 0 |
| 0 | 0 | 0 | 0 | 0 | lives with relative | 1 | 0 | 0 | Yes     | 0 |
|   |   |   | 0 | 0 | lives with relative | 1 | 0 | 0 | Yes     | 0 |
|   |   |   | 0 | 0 | lives with relative | 0 | 0 | 0 | Yes     | 0 |

|   |   |   |   |   |                     |   |   |   |     |   |
|---|---|---|---|---|---------------------|---|---|---|-----|---|
|   |   |   | 0 | 1 | lives with relative | 0 | 0 | 0 | Yes | 0 |
| 0 | 0 | 0 | 0 | 0 | lives with relative | 1 | 0 | 0 | Yes | 0 |
| 0 | 0 | 0 | 0 | 0 | lives with relative | 1 | 0 | 0 | Yes | 1 |
| 1 | 0 | 0 | 0 | 0 | lives with relative | 0 | 0 | 0 | Yes | 0 |
| 0 | 1 | 0 | 0 | 0 | lives with relative | 1 | 0 | 0 | Yes | 0 |
| 0 | 1 | 0 | 0 | 0 | lives with relative | 1 | 0 | 0 | Yes | 0 |
|   |   |   | 0 | 0 | lives with relative | 1 | 0 | 0 | Yes | 0 |
|   |   |   | 0 | 0 | lives with relative | 0 | 0 | 0 | Yes | 0 |
| 0 | 0 | 0 | 0 | 0 | lives with relative | 1 | 0 | 0 | Yes | 0 |
| 0 | 0 | 0 | 0 | 0 | lives with relative | 1 | 0 | 0 | Yes | 0 |
| 0 | 1 | 0 | 0 | 0 | lives with relative | 1 | 0 | 0 | Yes | 0 |
|   |   |   | 0 | 0 | lives alone         | 1 | 0 | 0 | Yes | 0 |
|   |   |   | 0 | 0 | lives with relative | 1 | 0 | 0 | Yes | 0 |
|   |   |   | 0 | 1 | lives with relative | 0 | 0 | 0 | Yes | 0 |
|   |   |   | 0 | 0 | lives with relative | 1 | 0 | 0 | Yes | 0 |
| 0 | 0 | 0 | 0 | 0 | lives with relative | 0 | 0 | 0 | Yes | 0 |
| 1 | 0 | 0 | 0 | 0 | lives with relative | 1 | 0 | 0 | Yes | 0 |
|   |   |   | 0 | 0 | lives with relative | 1 | 0 | 0 | Yes | 0 |
| 1 | 0 | 0 | 0 | 0 | lives with relative | 1 | 0 | 0 | Yes | 0 |
| 1 | 0 | 0 | 0 | 0 | lives with relative | 1 | 0 | 0 | Yes | 0 |
|   |   |   | 0 | 0 | lives with relative | 1 | 0 | 0 | Yes | 0 |
|   |   |   | 1 | 0 | lives with relative | 1 | 0 | 0 | Yes | 1 |
|   |   |   | 0 | 0 | lives with relative | 1 | 0 | 0 | Yes | 0 |
| 0 | 0 | 0 | 0 | 0 | lives with relative | 1 | 0 | 0 | Yes | 0 |
| 0 | 1 | 0 | 0 | 0 | lives with relative | 1 | 0 | 0 | Yes | 0 |
| 0 | 1 | 0 | 0 | 0 | lives with relative | 0 | 0 | 0 | Yes | 0 |
| 0 | 0 | 0 | 0 | 0 | lives with relative | 1 | 0 | 0 | Yes | 0 |
| 0 | 0 | 0 | 0 | 0 | lives alone         | 0 | 0 | 0 | Yes | 0 |
| 0 | 0 | 0 | 0 | 0 | lives with relative | 1 | 0 | 0 | Yes | 0 |
| 0 | 0 | 0 | 0 | 0 | lives with relative | 1 | 0 | 0 | Yes | 0 |

|   |   |   |   |   |                     |   |   |   |         |   |
|---|---|---|---|---|---------------------|---|---|---|---------|---|
|   |   |   | 0 | 0 | lives alone         | 1 | 0 | 0 | regular | 1 |
|   |   |   | 0 | 0 | lives with relative | 0 | 0 | 0 | regular | 0 |
| 1 | 0 | 0 | 0 | 0 | lives with relative | 0 | 0 | 0 | Yes     | 0 |
| 1 | 0 | 0 | 0 | 0 | lives with relative | 1 | 0 | 0 | Yes     | 0 |
| 1 | 0 | 0 | 1 | 1 | lives with relative | 0 | 0 | 0 | Yes     | 0 |
| 0 | 0 | 1 | 0 | 0 | lives with relative | 0 | 0 | 0 | No      | 0 |
| 0 | 0 | 1 | 0 | 0 | lives with relative | 1 | 0 | 0 | Yes     | 0 |
| 0 | 0 | 0 | 0 | 0 | lives with relative | 1 | 0 | 0 | Yes     | 0 |
| 1 | 0 | 0 | 0 | 1 | lives with relative | 1 | 0 | 0 | regular | 0 |
| 1 | 0 | 0 | 0 | 1 | lives with relative | 1 | 0 | 0 | Yes     | 0 |
| 0 | 0 | 1 | 0 | 0 | lives with relative | 1 | 0 | 0 | Yes     | 0 |
| 1 | 0 | 0 | 0 | 0 | lives with relative | 0 | 0 | 0 | Yes     | 0 |
| 0 | 0 | 1 | 0 | 0 | lives with relative | 1 | 0 | 0 | Yes     | 0 |
| 0 | 0 | 0 | 0 | 0 | lives with relative | 0 | 0 | 1 | Yes     | 0 |
| 1 | 0 | 0 | 0 | 0 | lives with relative | 1 | 0 | 0 | Yes     | 0 |
| 0 | 1 | 0 | 0 | 0 | lives with relative | 1 | 0 | 0 | Yes     | 0 |
| 1 | 0 | 0 | 0 | 1 | lives with relative | 1 | 0 | 1 | Yes     | 0 |
| 1 | 0 | 0 | 0 | 0 | lives with relative | 1 | 0 | 0 | Yes     | 1 |
| 0 | 0 | 0 | 1 | 1 | lives with relative | 1 | 0 | 0 | Yes     | 0 |
| 0 | 0 | 0 | 0 | 0 | lives with relative | 1 | 0 | 0 | Yes     | 0 |
| 1 | 0 | 0 | 0 | 1 | lives with relative | 1 | 0 | 0 |         | 0 |
| 0 | 0 | 1 | 1 | 0 | lives alone         | 1 | 0 | 0 | Yes     | 0 |
| 1 | 0 | 0 | 0 | 0 | lives with relative | 0 | 0 | 0 | Yes     | 0 |
| 0 | 1 | 0 | 0 | 0 | lives with relative | 1 | 0 | 0 | Yes     | 0 |
|   |   |   | 0 | 0 | lives with relative | 0 | 0 | 0 | Yes     | 0 |
| 0 | 0 | 0 | 0 | 0 | lives with relative | 1 | 0 | 0 | Yes     | 0 |
| 1 | 0 | 0 | 0 | 0 | lives alone         | 1 | 0 | 0 | No      | 1 |
| 1 | 0 | 0 | 0 | 0 | lives with relative | 1 | 0 | 0 | regular | 0 |
|   |   |   | 0 | 0 | lives with relative | 0 | 0 | 1 | Yes     | 0 |
| 0 | 1 | 0 | 0 | 1 | lives alone         | 1 | 0 | 1 | Yes     | 0 |

|   |   |   |   |   |                     |   |   |   |         |   |
|---|---|---|---|---|---------------------|---|---|---|---------|---|
| 0 | 0 | 0 | 0 | 0 | lives with relative | 1 | 0 | 0 | Yes     | 0 |
|   |   |   | 0 | 0 | lives with relative | 1 | 0 | 0 | Yes     | 0 |
| 0 | 0 | 0 | 0 | 0 | lives with relative | 0 | 0 | 0 | Yes     | 0 |
| 0 | 0 | 0 | 0 | 0 | lives with relative | 0 | 0 | 0 | regular | 0 |
| 0 | 1 | 0 | 0 | 0 | lives alone         | 1 | 0 | 0 | No      | 0 |
| 0 | 1 | 0 | 0 | 0 | lives with relative | 0 | 0 | 0 | Yes     | 0 |
| 1 | 0 | 0 | 0 | 1 | lives with relative | 1 | 0 | 0 | Yes     | 0 |
| 0 | 1 | 0 | 0 | 1 | lives with relative | 1 | 0 | 0 | regular | 0 |
| 1 | 0 | 0 | 0 | 0 | lives with relative | 0 | 0 | 1 | Yes     | 0 |
| 0 | 0 | 0 | 0 | 0 | lives with relative | 1 | 0 | 0 | Yes     | 0 |
| 0 | 0 | 0 | 0 | 0 | lives with relative | 0 | 0 | 0 | Yes     | 0 |
| 0 | 1 | 0 | 0 | 0 | lives alone         | 1 | 0 | 0 | Yes     | 0 |
| 0 | 0 | 0 | 0 | 0 | lives with relative | 1 | 0 | 0 | Yes     | 0 |
| 0 | 1 | 0 | 0 | 0 | lives with relative | 0 | 0 | 0 | regular | 0 |
| 0 | 0 | 0 | 0 | 0 | lives with relative | 1 | 0 | 0 | Yes     | 0 |
| 0 | 0 | 1 | 0 | 0 | lives with relative | 1 | 0 | 0 | Yes     | 0 |
| 1 | 0 | 0 | 1 | 0 | lives with relative | 1 | 1 | 0 | Yes     | 0 |
|   |   |   | 0 | 0 | lives with relative | 0 | 0 | 0 | Yes     | 0 |
| 0 | 0 | 0 | 0 | 0 | lives with relative | 1 | 0 | 0 | Yes     | 0 |
| 0 | 1 | 0 | 0 | 0 | lives with relative | 1 | 0 | 0 | Yes     | 0 |
| 0 | 0 | 0 | 0 | 0 | lives with relative | 1 | 0 | 0 | Yes     | 0 |
| 1 | 0 | 0 | 0 | 1 | lives with relative | 1 | 0 | 0 | Yes     | 0 |
|   |   |   | 0 | 0 | lives alone         | 1 | 0 | 0 | Yes     | 0 |
| 0 | 0 | 0 | 0 | 0 | lives alone         | 1 | 0 | 0 | Yes     | 1 |
| 1 | 0 | 0 | 0 | 1 | lives with relative | 1 | 0 | 0 | Yes     | 0 |
| 0 | 0 | 0 | 1 | 0 | lives with relative | 1 | 0 | 0 | Yes     | 0 |
| 0 | 1 | 0 | 0 | 0 | lives with relative | 1 | 0 | 0 | Yes     | 0 |
| 0 | 1 | 0 | 0 | 0 | lives with relative | 1 | 0 | 0 | Yes     | 0 |
| 0 | 0 | 0 | 0 | 0 | lives with relative | 0 | 0 | 0 | Yes     | 0 |
| 0 | 0 | 0 | 0 | 0 | lives with relative | 1 | 0 | 0 | Yes     | 1 |

|   |   |   |   |   |                     |   |   |   |         |   |
|---|---|---|---|---|---------------------|---|---|---|---------|---|
| 0 | 0 | 0 | 0 | 0 | lives with relative | 1 | 0 | 0 | Yes     | 0 |
| 0 | 0 | 0 | 0 | 0 | lives with relative | 0 | 0 | 0 | regular | 0 |
| 0 | 1 | 0 | 0 | 0 | lives with relative | 1 | 0 | 0 | regular | 0 |
| 0 | 0 | 0 | 0 | 0 | lives with relative | 0 | 0 | 0 | Yes     | 0 |
| 1 | 0 | 0 | 0 | 0 | lives with relative | 1 | 0 | 0 | Yes     | 0 |
| 0 | 0 | 0 | 0 | 0 | lives with relative | 1 | 0 | 0 | Yes     | 0 |
| 0 | 1 | 0 | 1 | 0 | lives with relative | 1 | 0 | 0 | Yes     | 0 |
| 0 | 1 | 0 | 0 | 0 | lives with relative | 1 | 0 | 0 | Yes     | 0 |
| 0 | 0 | 0 | 0 | 0 | lives with relative | 1 | 0 | 0 | Yes     | 0 |
|   |   |   | 0 | 0 | lives with relative | 0 | 0 | 0 | Yes     | 0 |
| 0 | 0 | 0 | 0 | 0 | lives with relative | 1 | 0 | 0 | No      | 0 |
| 0 | 1 | 0 | 0 | 0 | lives with relative | 1 | 0 | 0 | Yes     | 0 |
| 0 | 1 | 0 | 0 | 0 | lives with relative | 1 | 0 | 0 | Yes     | 0 |
| 0 | 0 | 0 | 1 | 0 | lives with relative | 1 | 0 | 0 | Yes     | 0 |
| 0 | 1 | 0 | 0 | 0 | lives with relative | 1 | 0 | 0 | Yes     | 0 |
| 0 | 1 | 0 | 0 | 0 | lives with relative | 1 | 0 | 0 | regular | 0 |
| 0 | 1 | 0 | 0 | 0 | lives with relative | 0 | 0 | 0 | Yes     | 0 |
| 0 | 1 | 0 | 0 | 0 | lives with relative | 1 | 0 | 0 | Yes     | 0 |
| 0 | 0 | 0 | 1 | 1 | lives with relative | 1 | 0 | 0 | Yes     | 0 |
| 0 | 0 | 0 | 0 | 0 | lives with relative | 1 | 0 | 0 | regular | 0 |
| 0 | 0 | 0 | 0 | 0 | lives with relative | 1 | 0 | 0 | Yes     | 0 |
| 0 | 1 | 0 | 0 | 0 | lives with relative | 1 | 0 | 0 | Yes     | 0 |
| 0 | 1 | 0 | 1 | 0 | lives with relative | 1 | 0 | 0 | Yes     | 0 |
| 0 | 1 | 0 | 0 | 0 | lives with relative | 1 | 0 | 0 | Yes     | 1 |
| 0 | 0 | 0 | 0 | 0 | lives with relative | 0 | 0 | 0 | Yes     | 0 |
| 0 | 0 | 0 | 0 | 0 | lives with relative | 1 | 0 | 0 | Yes     | 0 |
| 0 | 0 | 0 | 0 | 0 | lives with relative | 1 | 0 | 0 | Yes     | 0 |
| 0 | 0 | 0 | 0 | 0 | lives with relative | 1 | 0 | 0 | Yes     | 0 |
| 0 | 1 | 0 | 0 | 0 | lives with relative | 1 | 0 | 0 | Yes     | 0 |
| 0 | 0 | 0 | 0 | 0 | lives with relative | 0 | 0 | 0 | Yes     | 0 |



|   |   |   |   |   |                     |   |   |   |         |   |
|---|---|---|---|---|---------------------|---|---|---|---------|---|
| 0 | 0 | 0 | 1 | 0 | lives alone         | 1 | 0 | 0 | Yes     | 0 |
| 0 | 0 | 0 | 0 | 0 | lives with relative | 1 | 0 | 0 | Yes     | 0 |
| 1 | 0 | 0 | 0 | 0 | lives with relative | 1 | 0 | 0 | Yes     | 0 |
| 1 | 0 | 0 | 0 | 0 | lives with relative | 1 | 0 | 0 | Yes     | 0 |
| 1 | 0 | 0 | 0 | 0 | lives with relative | 0 | 0 | 0 | regular | 0 |
| 1 | 0 | 0 | 0 | 0 | lives with relative | 0 | 0 | 0 | Yes     | 1 |
| 0 | 0 | 0 | 0 | 0 | lives alone         | 1 | 0 | 0 | Yes     | 0 |
| 0 | 1 | 0 | 0 | 0 | lives with relative | 1 | 0 | 0 | Yes     | 0 |
| 0 | 1 | 0 | 0 | 0 | lives with relative | 0 | 0 | 0 | Yes     | 0 |
| 0 | 0 | 0 | 0 | 0 | lives with relative | 1 | 0 | 0 | Yes     | 0 |
| 0 | 0 | 0 | 1 | 1 | lives with relative | 1 | 0 | 0 | Yes     | 0 |
| 0 | 1 | 0 | 0 | 0 | lives with relative | 1 | 0 | 0 | Yes     | 0 |
| 0 | 0 | 0 | 0 | 1 | lives with relative | 0 | 0 | 0 | Yes     | 0 |
| 0 | 0 | 0 | 0 | 1 | lives alone         | 1 | 0 | 0 | Yes     | 0 |
| 0 | 0 | 0 | 1 | 1 | lives with relative | 1 | 0 | 0 | Yes     | 0 |
| 0 | 0 | 0 | 0 | 0 | lives with relative | 1 | 0 | 0 | Yes     | 0 |
| 0 | 0 | 0 | 0 | 1 | lives with relative | 1 | 0 | 0 | Yes     | 0 |
| 1 | 0 | 0 | 1 | 0 | lives with relative | 1 | 0 | 0 | regular | 0 |
| 1 | 0 | 0 | 0 | 0 | lives with relative | 1 | 0 | 0 | Yes     | 0 |
| 0 | 1 | 0 | 0 | 0 | lives with relative | 1 | 0 | 0 | Yes     | 0 |
|   |   |   | 0 | 0 | lives with relative | 1 | 0 | 0 | Yes     | 0 |
| 0 | 0 | 0 | 0 | 0 | lives with relative | 1 | 0 | 0 | Yes     | 0 |
| 0 | 1 | 0 | 0 | 0 | lives with relative | 1 | 0 | 0 | Yes     | 0 |
| 0 | 0 | 1 | 0 | 0 | lives with relative | 1 | 0 | 0 | Yes     | 0 |
|   |   |   | 0 | 0 | lives with relative | 1 | 0 | 0 | Yes     | 0 |
|   |   |   | 0 | 0 | lives with relative | 1 | 0 | 0 | Yes     | 0 |
|   |   |   | 0 | 0 | lives with relative | 1 | 0 | 0 | Yes     | 0 |
| 0 | 0 | 0 | 0 | 0 | lives with relative | 1 | 0 | 0 | Yes     | 0 |
| 1 | 0 | 0 | 0 | 0 | lives with relative | 1 | 0 | 0 | Yes     | 0 |
| 1 | 0 | 0 | 0 | 0 | lives with relative | 1 | 0 | 0 | Yes     | 0 |

|   |   |   |   |   |                     |   |   |   |         |   |
|---|---|---|---|---|---------------------|---|---|---|---------|---|
| 1 | 0 | 0 | 0 | 0 | lives with relative | 1 | 0 | 0 | Yes     | 1 |
| 0 | 0 | 0 | 0 | 1 | lives alone         | 1 | 0 | 0 | Yes     | 0 |
| 1 | 0 | 0 | 0 | 0 | lives with relative | 1 | 0 | 0 | regular | 0 |
| 0 | 0 | 0 | 0 | 0 | lives with relative | 1 | 0 | 0 | Yes     | 0 |
| 0 | 0 | 0 | 0 | 0 | lives with relative | 1 | 0 | 0 | Yes     | 0 |
| 0 | 0 | 0 | 1 | 0 | lives with relative | 1 | 1 | 0 | Yes     | 0 |
| 0 | 1 | 0 | 0 | 0 | lives with relative | 1 | 0 | 0 | Yes     | 0 |
| 0 | 0 | 1 | 1 | 0 | lives with relative | 1 | 0 | 0 | Yes     | 0 |
| 0 | 1 | 0 | 0 | 0 | lives with relative | 1 | 0 | 0 | Yes     | 0 |
|   |   |   | 0 | 0 | lives with relative | 0 | 0 | 0 | Yes     | 0 |
|   |   |   | 0 | 0 |                     | 0 | 0 | 0 |         | 0 |
| 0 | 0 | 0 | 1 | 0 | lives with relative | 1 | 0 | 0 | Yes     | 0 |
| 1 | 0 | 0 | 0 | 0 | lives with relative | 1 | 0 | 0 | Yes     | 0 |
| 0 | 0 | 0 | 0 | 0 | lives with relative | 1 | 0 | 0 | Yes     | 0 |
|   |   |   | 0 | 0 | lives alone         | 1 | 0 | 0 | Yes     | 0 |
| 1 | 0 | 0 | 0 | 0 | lives with relative | 1 | 0 | 0 | Yes     | 0 |
| 0 | 1 | 0 | 0 | 0 | lives alone         | 1 | 0 | 0 | Yes     | 0 |
| 0 | 0 | 0 | 0 | 0 | lives with relative | 1 | 0 | 0 | Yes     | 0 |
| 0 | 0 | 0 | 0 | 0 | lives with relative | 0 | 0 | 0 | Yes     | 0 |
| 0 | 0 | 0 | 0 | 0 | lives with relative | 1 | 0 | 0 | Yes     | 0 |
| 0 | 0 | 0 | 1 | 0 | lives with relative | 1 | 0 | 0 | Yes     | 0 |
| 0 | 1 | 0 | 1 | 0 | lives with relative | 1 | 0 | 0 | Yes     | 0 |
| 0 | 1 | 0 | 0 | 0 | lives with relative | 1 | 0 | 0 | Yes     | 0 |
| 0 | 1 | 0 | 0 | 0 | lives with relative | 1 | 1 | 0 | Yes     | 0 |
| 0 | 0 | 0 | 0 | 0 | lives with relative | 0 | 0 | 0 | Yes     | 0 |
| 0 | 1 | 0 | 0 | 0 | lives with relative | 1 | 0 | 0 | Yes     | 0 |
| 0 | 0 | 0 | 0 | 0 | lives with relative | 1 | 0 | 0 | Yes     | 0 |
|   |   |   | 0 | 0 | lives with relative | 1 | 0 | 0 | Yes     | 0 |
|   |   |   | 0 | 0 | lives with relative | 1 | 0 | 0 | Yes     | 0 |
| 0 | 0 | 0 | 0 | 0 | lives with relative | 0 | 0 | 0 | Yes     | 0 |

|   |   |   |   |   |                     |   |   |   |         |   |
|---|---|---|---|---|---------------------|---|---|---|---------|---|
| 0 | 0 | 0 | 0 | 0 | lives with relative | 1 | 0 | 0 | Yes     | 0 |
| 0 | 0 | 0 | 0 | 0 | lives with relative | 1 | 0 | 0 | Yes     | 0 |
| 0 | 0 | 0 | 0 | 0 | lives with relative | 1 | 0 | 0 | Yes     | 0 |
|   |   |   | 0 | 0 | lives with relative | 1 | 0 | 0 | regular | 0 |
| 0 | 0 | 0 | 0 | 0 | lives with relative | 1 | 0 | 0 | Yes     | 0 |
| 1 | 0 | 0 | 1 | 0 | lives with relative | 1 | 0 | 0 | Yes     | 0 |
|   |   |   | 0 | 0 | lives with relative | 1 | 1 | 0 | Yes     | 0 |
| 0 | 1 | 0 | 0 | 0 | lives with relative | 1 | 0 | 0 | Yes     | 0 |
| 0 | 0 | 0 | 0 | 0 | lives alone         | 1 | 0 | 0 | Yes     | 0 |
| 1 | 0 | 0 | 0 | 0 | lives with relative | 1 | 0 | 0 | Yes     | 0 |
|   |   |   | 0 | 0 | lives with relative | 0 | 0 | 0 | Yes     | 0 |
|   |   |   | 0 | 0 | lives alone         | 1 | 0 | 0 | Yes     | 0 |
| 1 | 0 | 0 | 0 | 0 | lives with relative | 1 | 0 | 0 | Yes     | 0 |
| 0 | 0 | 0 | 0 | 0 | lives with relative | 1 | 0 | 0 | Yes     | 0 |
| 1 | 0 | 0 | 0 | 0 | lives with relative | 1 | 0 | 0 | Yes     | 0 |
| 0 | 1 | 0 | 0 | 0 | lives with relative | 1 | 0 | 0 | regular | 0 |
| 0 | 0 | 0 | 0 | 0 | lives with relative | 0 | 0 | 0 | Yes     | 0 |
| 0 | 1 | 0 | 0 | 0 | lives with relative | 1 | 0 | 0 | Yes     | 0 |
| 0 | 0 | 0 | 0 | 0 | lives with relative | 0 | 0 | 0 | Yes     | 0 |
| 0 | 0 | 0 | 0 | 0 | lives with relative | 1 | 0 | 0 | Yes     | 0 |
| 0 | 1 | 0 | 1 | 1 | lives with relative | 1 | 0 | 0 | Yes     | 0 |
| 1 | 0 | 0 | 0 | 0 | lives with relative | 1 | 0 | 0 | Yes     | 0 |
| 0 | 0 | 0 | 0 | 0 | lives with relative | 1 | 0 | 0 | No      | 0 |
| 1 | 0 | 0 | 0 | 0 | lives with relative | 1 | 0 | 0 | Yes     | 0 |
| 0 | 0 | 0 | 0 | 0 | lives with relative | 0 | 0 | 0 | Yes     | 0 |
|   |   |   | 0 | 0 | lives with relative | 1 | 0 | 0 | Yes     | 0 |
| 1 | 0 | 0 | 0 | 0 | lives with relative | 1 | 0 | 0 | Yes     | 0 |
|   |   |   | 0 | 0 | lives with relative | 0 | 0 | 0 | Yes     | 0 |
| 0 | 0 | 0 | 0 | 0 | lives alone         | 1 | 1 | 0 | Yes     | 0 |
| 0 | 1 | 0 | 0 | 0 | lives with relative | 1 | 0 | 0 | Yes     | 0 |

|   |   |   |   |   |                     |   |   |   |         |   |
|---|---|---|---|---|---------------------|---|---|---|---------|---|
|   |   |   | 0 | 0 | lives with relative | 1 | 0 | 0 | Yes     | 0 |
| 0 | 1 | 0 | 0 | 0 | lives with relative | 1 | 0 | 0 | Yes     | 0 |
| 0 | 0 | 0 | 0 | 0 | lives with relative | 0 | 0 | 0 | regular | 0 |
| 0 | 0 | 0 | 0 | 0 | lives with relative | 1 | 0 | 0 | Yes     | 0 |
| 1 | 0 | 0 | 0 | 0 | lives with relative | 1 | 0 | 0 | Yes     | 0 |
| 0 | 0 | 0 | 0 | 0 | lives with relative | 1 | 0 | 0 | Yes     | 0 |
| 0 | 0 | 0 | 0 | 0 | lives alone         | 1 | 0 | 0 | Yes     | 0 |
| 0 | 1 | 0 | 0 | 0 | lives with relative | 1 | 0 | 0 | Yes     | 0 |
| 0 | 0 | 0 | 0 | 0 | lives alone         | 1 | 0 | 0 | regular | 0 |
| 1 | 0 | 0 | 0 | 0 | lives with relative | 1 | 0 | 0 | Yes     | 0 |
| 0 | 1 | 0 | 0 | 0 | lives with relative | 1 | 0 | 0 | Yes     | 0 |
|   |   |   | 0 | 1 | lives alone         | 1 | 0 | 0 | Yes     | 0 |
| 0 | 1 | 0 | 0 | 0 | lives with relative | 1 | 0 | 0 | regular | 0 |
| 0 | 0 | 0 | 0 | 0 | lives with relative | 1 | 0 | 0 | Yes     | 0 |
| 0 | 0 | 0 | 0 | 0 | lives with relative | 1 | 0 | 0 | Yes     | 0 |
|   |   |   | 0 | 0 | lives alone         | 1 | 0 | 0 | regular | 0 |
| 0 | 0 | 0 | 0 | 0 | lives with relative | 1 | 0 | 0 | No      | 0 |
| 1 | 0 | 0 | 0 | 0 | lives with relative | 1 | 0 | 0 | Yes     | 0 |
| 0 | 0 | 0 | 0 | 0 | lives with relative | 1 | 0 | 0 | Yes     | 0 |
| 0 | 0 | 0 | 0 | 0 | lives with relative | 1 | 0 | 0 | Yes     | 0 |
| 1 | 0 | 0 | 0 | 0 | lives with relative | 1 | 0 | 0 | Yes     | 0 |
| 1 | 0 | 0 | 0 | 0 | lives with relative | 1 | 0 | 0 | Yes     | 0 |
| 0 | 1 | 0 | 0 | 0 | lives with relative | 1 | 0 | 0 | Yes     | 0 |
| 1 | 0 | 0 | 0 | 0 | lives with relative | 1 | 0 | 0 | Yes     | 0 |
|   |   |   | 0 | 0 | lives with relative | 0 | 0 | 0 | Yes     | 0 |
| 0 | 0 | 0 | 0 | 0 | lives with relative | 1 | 0 | 0 | Yes     | 0 |
|   |   |   | 0 | 0 | lives with relative | 1 | 0 | 0 | No      | 0 |
| 1 | 0 | 0 | 0 | 0 | lives with relative | 1 | 0 | 0 | Yes     | 0 |
| 1 | 0 | 0 | 0 | 0 | lives with relative | 1 | 0 | 0 | Yes     | 0 |
| 0 | 1 | 0 | 0 | 1 | lives alone         | 1 | 0 | 0 | Yes     | 0 |

|   |   |   |   |   |                     |   |   |   |         |   |
|---|---|---|---|---|---------------------|---|---|---|---------|---|
| 1 | 0 | 0 | 0 | 0 | lives with relative | 1 | 0 | 0 | Yes     | 0 |
| 0 | 0 | 0 | 0 | 0 | lives with relative | 1 | 0 | 0 | Yes     | 0 |
| 1 | 0 | 0 | 0 | 0 | lives with relative | 1 | 0 | 0 | Yes     | 0 |
| 0 | 0 | 0 | 0 | 0 | lives with relative | 1 | 0 | 0 | Yes     | 0 |
| 0 | 0 | 0 | 0 | 0 | lives with relative | 1 | 0 | 1 | Yes     | 0 |
| 0 | 0 | 0 | 0 | 0 | lives with relative | 1 | 0 | 0 | Yes     | 0 |
| 1 | 0 | 0 | 0 | 0 | lives with relative | 1 | 0 | 0 | Yes     | 0 |
| 0 | 0 | 0 | 0 | 0 | lives with relative | 1 | 0 | 0 | Yes     | 0 |
| 0 | 1 | 0 | 0 | 0 | lives with relative | 1 | 0 | 1 | Yes     | 0 |
|   |   |   | 0 | 0 | lives alone         | 1 | 0 | 0 | Yes     | 0 |
|   |   |   | 0 | 0 | lives alone         | 0 | 0 | 0 | Yes     | 0 |
| 0 | 0 | 0 | 0 | 0 | lives with relative | 0 | 0 | 0 | Yes     | 0 |
| 1 | 0 | 0 | 0 | 0 | lives with relative | 0 | 0 | 0 | regular | 0 |
| 0 | 0 | 0 | 1 | 0 | lives with relative | 0 | 0 | 0 | Yes     | 1 |
| 1 | 0 | 0 | 0 | 0 | lives with relative | 1 | 0 | 0 | Yes     | 0 |
| 0 | 0 | 0 | 0 | 0 | lives with relative | 1 | 0 | 0 | Yes     | 0 |
| 0 | 0 | 0 | 0 | 0 | lives with relative | 0 | 0 | 0 | Yes     | 0 |
| 0 | 0 | 0 | 0 | 0 | lives with relative | 1 | 0 | 0 | Yes     | 0 |
| 1 | 0 | 0 | 0 | 0 | lives with relative | 0 | 0 | 0 | Yes     | 0 |
| 0 | 0 | 0 | 0 | 0 | lives with relative | 1 | 0 | 0 | Yes     | 0 |
| 0 | 0 | 0 | 0 | 0 | lives with relative | 1 | 0 | 0 | Yes     | 0 |
| 0 | 0 | 0 | 0 | 0 | lives with relative | 1 | 0 | 0 | Yes     | 0 |
| 0 | 0 | 0 | 0 | 0 | lives with relative | 1 | 0 | 0 | Yes     | 0 |
| 1 | 0 | 0 | 0 | 0 | lives with relative | 1 | 0 | 0 | Yes     | 0 |
| 0 | 0 | 0 | 0 | 0 | lives with relative | 1 | 0 | 0 | regular | 0 |
| 0 | 0 | 0 | 0 | 0 | lives with relative | 1 | 0 | 0 | Yes     | 0 |
| 0 | 0 | 0 | 0 | 0 | lives with relative | 1 | 0 | 0 | Yes     | 0 |
| 0 | 1 | 0 | 0 | 0 | lives with relative | 1 | 0 | 0 | Yes     | 0 |
| 0 | 1 | 0 | 0 | 0 | lives with relative | 0 | 0 | 1 | Yes     | 0 |
| 0 | 0 | 0 | 0 | 0 | lives with relative | 1 | 0 | 1 | Yes     | 0 |
| 0 | 0 | 0 | 0 | 0 | lives with relative | 1 | 0 | 0 | Yes     | 0 |

|   |   |   |   |   |                     |   |   |   |     |   |
|---|---|---|---|---|---------------------|---|---|---|-----|---|
| 0 | 0 | 0 | 0 | 0 | lives with relative | 1 | 0 | 0 | Yes | 0 |
| 0 | 0 | 0 | 0 | 0 | lives with relative | 1 | 0 | 0 | Yes | 0 |
|   |   |   | 0 | 0 | lives with relative | 1 | 0 | 0 | Yes | 0 |
| 0 | 0 | 0 | 0 | 0 | lives with relative | 1 | 0 | 0 | Yes | 0 |
| 0 | 0 | 0 | 0 | 0 | lives with relative | 1 | 0 | 0 | Yes | 0 |
| 1 | 0 | 0 | 1 | 0 | lives with relative | 0 | 0 | 0 | Yes | 0 |
| 0 | 0 | 0 | 0 | 0 | lives with relative | 1 | 0 | 1 | Yes | 0 |
| 1 | 0 | 0 | 0 | 0 | lives with relative | 1 | 0 | 0 | Yes | 0 |
| 0 | 0 | 0 | 0 | 0 | lives with relative | 1 | 0 | 0 | Yes | 0 |
| 1 | 0 | 0 | 0 | 0 | lives with relative | 1 | 0 | 0 | Yes | 0 |
| 0 | 1 | 0 | 0 | 0 | lives with relative | 1 | 0 | 1 | Yes | 0 |
| 1 | 0 | 0 | 0 | 0 | lives with relative | 1 | 0 | 0 | Yes | 0 |
| 0 | 0 | 0 | 0 | 0 | lives with relative | 1 | 0 | 0 | Yes | 0 |
|   |   |   | 0 | 0 |                     | 0 | 0 | 0 |     | 0 |
| 0 | 1 | 0 | 0 | 0 | lives with relative | 1 | 0 | 0 | Yes | 0 |
| 1 | 0 | 0 | 0 | 0 | lives with relative | 1 | 0 | 0 | Yes | 0 |
| 0 | 1 | 0 | 0 | 0 | lives with relative | 1 | 0 | 0 | Yes | 0 |
|   |   |   | 0 | 0 | lives with relative | 0 | 0 | 0 | Yes | 0 |
| 0 | 0 | 0 | 0 | 0 | lives with relative | 1 | 0 | 0 | Yes | 0 |
| 0 | 1 | 0 | 0 | 0 | lives with relative | 1 | 0 | 1 | Yes | 0 |
| 0 | 0 | 0 | 0 | 0 | lives with relative | 1 | 1 | 1 | Yes | 0 |
| 0 | 1 | 0 | 0 | 0 | lives with relative | 0 | 0 | 1 | Yes | 0 |
| 0 | 0 | 0 | 0 | 0 | lives with relative | 0 | 0 | 0 | Yes | 0 |
| 0 | 0 | 0 | 0 | 0 | lives with relative | 1 | 0 | 0 | Yes | 0 |
| 0 | 1 | 0 | 0 | 0 | lives with relative | 0 | 0 | 0 | Yes | 0 |
|   |   |   | 0 | 0 | lives with relative | 1 | 0 | 0 | Yes | 0 |
| 0 | 0 | 0 | 0 | 0 | lives with relative | 1 | 0 | 0 | Yes | 0 |
| 0 | 0 | 0 | 0 | 0 | lives with relative | 1 | 0 | 0 | Yes | 0 |
| 0 | 0 | 0 | 0 | 0 | lives alone         | 1 | 0 | 0 | Yes | 0 |
| 0 | 0 | 0 | 0 | 0 | lives alone         | 1 | 0 | 0 | Yes | 0 |

|   |   |   |   |   |                     |   |   |   |         |   |
|---|---|---|---|---|---------------------|---|---|---|---------|---|
|   |   |   | 0 | 1 | lives alone         | 0 | 0 | 0 | Yes     | 0 |
| 0 | 1 | 0 | 0 | 0 | lives with relative | 1 | 0 | 0 | Yes     | 0 |
| 1 | 0 | 0 | 0 | 0 | lives alone         | 0 | 0 | 0 | Yes     | 0 |
| 0 | 0 | 0 | 0 | 0 | lives with relative | 1 | 0 | 1 | Yes     | 0 |
|   |   |   | 0 | 0 | lives with relative | 1 | 0 | 0 | Yes     | 0 |
| 1 | 0 | 0 | 0 | 0 | lives with relative | 1 | 0 | 1 | Yes     | 0 |
| 0 | 0 | 0 | 0 | 0 | lives alone         | 1 | 0 | 0 | Yes     | 0 |
|   |   |   | 0 | 0 | lives with relative | 1 | 0 | 1 | Yes     | 0 |
| 1 | 0 | 0 | 0 | 1 | lives with relative | 1 | 0 | 0 | regular | 0 |
| 0 | 0 | 0 | 0 | 0 | lives alone         | 1 | 0 | 0 | Yes     | 0 |
| 1 | 0 | 0 | 0 | 0 | lives with relative | 1 | 0 | 0 | Yes     | 0 |
| 0 | 0 | 0 | 0 | 0 | lives with relative | 0 | 0 | 0 | Yes     | 0 |
| 0 | 1 | 0 | 0 | 0 | lives with relative | 1 | 0 | 0 | regular | 0 |
| 0 | 0 | 0 | 0 | 0 | lives with relative | 0 | 0 | 0 | Yes     | 0 |
| 0 | 0 | 0 | 0 | 0 | lives with relative | 0 | 0 | 0 | Yes     | 0 |
| 1 | 0 | 0 | 0 | 0 | lives with relative | 1 | 0 | 0 | Yes     | 0 |
| 0 | 0 | 0 | 0 | 1 | lives with relative | 0 | 0 | 0 | Yes     | 0 |
| 0 | 1 | 0 | 0 | 0 | lives with relative | 1 | 0 | 1 | Yes     | 0 |
| 0 | 1 | 0 | 0 | 0 | lives with relative | 1 | 0 | 1 | Yes     | 0 |
| 0 | 1 | 0 | 0 | 1 | lives with relative | 1 | 0 | 0 | regular | 0 |
| 0 | 1 | 0 | 0 | 0 | lives with relative | 1 | 0 | 0 | Yes     | 0 |
| 0 | 0 | 0 | 0 | 0 | lives with relative | 1 | 0 | 0 | Yes     | 0 |
| 0 | 0 | 0 | 0 | 1 | lives with relative | 1 | 0 | 1 | Yes     | 0 |
|   |   |   | 0 | 0 | lives with relative | 0 | 0 | 1 | Yes     | 0 |
| 0 | 0 | 0 | 0 | 1 | lives with relative | 1 | 0 | 0 | Yes     | 0 |
| 1 | 0 | 0 | 0 | 0 | lives alone         | 1 | 1 | 0 | Yes     | 0 |
|   |   |   | 0 | 0 | lives alone         | 1 | 0 | 0 | Yes     | 0 |
| 0 | 0 | 0 | 1 | 1 | lives with relative | 0 | 0 | 0 | Yes     | 0 |
| 0 | 0 | 0 | 0 | 0 | lives with relative | 1 | 0 | 0 | Yes     | 0 |
| 0 | 1 | 0 | 0 | 0 | lives with relative | 0 | 0 | 0 | regular | 0 |

|   |   |   |   |   |                     |   |   |   |         |   |
|---|---|---|---|---|---------------------|---|---|---|---------|---|
| 0 | 0 | 0 | 0 | 0 | lives with relative | 1 | 0 | 1 | Yes     | 0 |
| 1 | 0 | 0 | 0 | 1 | lives with relative | 1 | 0 | 0 | Yes     | 0 |
| 0 | 0 | 0 | 0 | 0 | lives with relative | 1 | 0 | 0 | Yes     | 0 |
| 1 | 0 | 0 | 0 | 0 | lives with relative | 1 | 0 | 0 | Yes     | 0 |
| 1 | 0 | 0 | 0 | 0 | lives with relative | 1 | 0 | 0 | Yes     | 0 |
| 1 | 0 | 0 | 0 | 0 | lives with relative | 1 | 0 | 0 | Yes     | 0 |
| 0 | 1 | 0 | 1 | 1 | lives with relative | 1 | 0 | 0 | regular | 0 |
|   |   |   | 0 | 0 | lives with relative | 1 | 0 | 0 | Yes     | 0 |
| 0 | 0 | 0 | 0 | 0 | lives with relative | 1 | 0 | 0 | Yes     | 0 |
| 0 | 1 | 0 | 0 | 0 | lives with relative | 1 | 0 | 1 | Yes     | 0 |
| 0 | 0 | 0 | 0 | 0 | lives with relative | 1 | 1 | 1 | Yes     | 0 |
|   |   |   | 0 | 0 | lives with relative | 1 | 0 | 0 | Yes     | 0 |
| 0 | 1 | 0 | 0 | 0 | lives with relative | 1 | 0 | 1 | regular | 0 |
| 0 | 0 | 0 | 0 | 0 | lives with relative | 1 | 0 | 0 | regular | 0 |
| 0 | 0 | 0 | 0 | 0 | lives with relative | 1 | 0 | 0 | Yes     | 0 |
| 0 | 1 | 0 | 0 | 0 | lives with relative | 0 | 0 | 0 | Yes     | 0 |
| 0 | 1 | 0 | 0 | 0 | lives with relative | 1 | 0 | 0 | Yes     | 0 |
|   |   |   | 0 | 0 | lives with relative | 0 | 0 | 0 | Yes     | 0 |
| 1 | 0 | 0 | 0 | 1 | lives with relative | 1 | 0 | 0 | Yes     | 0 |
| 1 | 0 | 0 | 0 | 0 | lives with relative | 0 | 0 | 1 | Yes     | 0 |
| 1 | 0 | 0 | 0 | 0 | lives with relative | 1 | 0 | 1 | Yes     | 0 |
| 0 | 0 | 0 | 0 | 0 | lives with relative | 1 | 1 | 0 | Yes     | 0 |
| 1 | 0 | 0 | 0 | 0 | lives with relative | 1 | 0 | 1 | Yes     | 0 |
| 0 | 0 | 1 | 0 | 0 | lives with relative | 1 | 0 | 0 | Yes     | 0 |
| 0 | 1 | 0 | 0 | 0 | lives with relative | 1 | 0 | 1 | Yes     | 0 |
| 1 | 0 | 0 | 0 | 0 | lives with relative | 1 | 0 | 0 | Yes     | 0 |
| 1 | 0 | 0 | 0 | 0 | lives with relative | 1 | 0 | 0 | Yes     | 0 |
| 1 | 0 | 0 | 0 | 0 | lives with relative | 0 | 0 | 0 |         | 0 |
| 0 | 0 | 0 | 0 | 0 | lives with relative | 0 | 0 | 0 | Yes     | 0 |
|   |   |   | 0 | 0 | lives with relative | 0 | 0 | 0 | Yes     | 0 |



|   |   |   |   |   |                     |   |   |   |         |   |
|---|---|---|---|---|---------------------|---|---|---|---------|---|
| 0 | 0 | 0 | 0 | 0 | lives with relative | 1 | 0 | 0 | Yes     | 0 |
| 0 | 0 | 0 | 0 | 0 | lives with relative | 1 | 0 | 0 | Yes     | 0 |
| 0 | 0 | 0 | 0 | 1 | lives with relative | 1 | 0 | 0 | Yes     | 0 |
| 0 | 1 | 0 | 0 | 0 | lives with relative | 1 | 0 | 0 | Yes     | 0 |
| 1 | 0 | 0 | 0 | 0 | lives with relative | 1 | 0 | 0 | Yes     | 0 |
| 0 | 0 | 0 | 0 | 0 | lives with relative | 0 | 0 | 0 | Yes     | 0 |
| 1 | 0 | 0 | 0 | 0 | lives with relative | 1 | 0 | 0 | Yes     | 0 |
| 1 | 0 | 0 | 0 | 0 | lives with relative | 1 | 0 | 0 | Yes     | 0 |
| 1 | 0 | 0 | 0 | 0 | lives with relative | 1 | 0 | 0 | Yes     | 0 |
| 1 | 0 | 0 | 0 | 0 | lives with relative | 1 | 0 | 0 | regular | 0 |
|   |   |   | 0 | 0 | lives alone         | 1 | 0 | 0 | Yes     | 0 |
| 1 | 0 | 0 | 0 | 0 | lives with relative | 1 | 0 | 0 | Yes     | 0 |
| 0 | 0 | 0 | 0 | 0 | lives with relative | 0 | 0 | 0 | Yes     | 0 |
| 0 | 1 | 0 | 0 | 0 | lives with relative | 1 | 0 | 1 | Yes     | 0 |
